1 ***Most cancers carry a substantial deleterious load due to Hill-Robertson***  
2 ***interference***

3 Susanne Tilk<sup>1</sup>, Christina Curtis<sup>2,3,4</sup>, Dmitri A Petrov<sup>1,\*</sup>, Christopher D McFarland<sup>1,†</sup>

4 <sup>1</sup>Department of Biology, Stanford University, Stanford CA 94305

5 <sup>2</sup>Department of Medicine, Division of Oncology, Stanford University School of Medicine,  
6 Stanford, CA, USA

7 <sup>3</sup>Department of Genetics, Stanford University School of Medicine, Stanford, CA, USA.

8 <sup>4</sup>Stanford Cancer Institute, Stanford University School of Medicine, Stanford, CA, USA.

9 \*dpetrov@stanford.edu

10 †cmcfar12@stanford.edu  
11

12  
13

14

15

16

17

18

19

20

21

22

23

24

25

26

27

28

29

30

31

## 1 **Abstract**

2 *Cancer genomes exhibit surprisingly weak signatures of negative selection<sup>1,2</sup>. This may*  
3 *be because tumors evolve under weak selective pressures ('weak selection') or*  
4 *because genome-wide linkage in cancer prevents most deleterious mutations from*  
5 *being removed due to Hill-Robertson interference<sup>3</sup> ('inefficient selection'). The weak*  
6 *selection model argues that most genes are only important for multicellular function and*  
7 *that selection acts only on a subset of essential genes. In contrast, the inefficient*  
8 *selection model predicts that only cancers with low mutational burdens, where linkage*  
9 *effects are minimal, will exhibit strong signals of negative selection against deleterious*  
10 *passengers and positive selection for beneficial drivers. We leverage the 10,000-fold*  
11 *variation in mutational burden across cancer subtypes to stratify tumors by their*  
12 *genome-wide mutational burden and used a normalized ratio of nonsynonymous to*  
13 *synonymous substitutions (dN/dS) to quantify the extent that selection varies with*  
14 *mutation rate. We find that appreciable negative selection (dN/dS ~ 0.4) is present in*  
15 *tumors with a low mutational burden, while the remaining cancers (96%) exhibit dN/dS*  
16 *ratios approaching 1, suggesting that the majority of tumors do not remove deleterious*  
17 *passengers. A parallel pattern is seen in drivers, where positive selection attenuates as*  
18 *the mutational burden of cancers increases. Both trends persist across tumor-types, are*  
19 *not exclusive to essential or housekeeping genes, are present in clonal and subclonal*  
20 *mutations, and persist in Copy Number Alterations. A consequence of this inability to*  
21 *remove deleterious passengers is that tumors with elevated mutational burdens, which*  
22 *are expected to harbor substantial protein folding stress, upregulate heat shock*  
23 *pathways. Finally, using evolutionary modeling, we find that Hill-Robertson interference*  
24 *alone can reproduce the patterns of attenuated selection observed in both drivers and*  
25 *passengers if the average fitness cost of passengers is 1.0% and the average fitness*  
26 *benefit of drivers is 19%. As a result, despite the weak individual fitness effects of*  
27 *passengers, most cancers harbor a large mutational load (median ~40% total fitness*  
28 *cost). Collectively, our findings suggest that the lack of observed negative selection in*  
29 *most tumors is not due to relaxed selective pressures, but rather the inability of*  
30 *selection to remove individual deleterious mutations in the presence of genome-wide*  
31 *linkage.*

32

## 1 Introduction

2 Tumor progression is an evolutionary process acting on somatic cells within the  
3 body. These cells acquire mutations over time that can alter cellular fitness by either  
4 increasing or decreasing the rates of cell division and/or cell death. Mutations which  
5 increase cellular fitness (drivers) are observed in cancer genomes more frequently  
6 because natural selection enriches their prevalence within the tumor population<sup>1,2</sup>. This  
7 increased prevalence of mutations across patients within specific genes is used to  
8 identify driver genes. Conversely, mutations that decrease cellular fitness (deleterious  
9 passengers) are expected to be observed less frequently. This enrichment or depletion  
10 is often measured by comparing the expected number of nonsynonymous mutations  
11 (dN) within a region of the genome to the expected number of synonymous mutations  
12 (dS), which are presumed to be neutral. This ratio, dN/dS, is expected to be below 1  
13 when the majority of nonsynonymous mutations are deleterious and removed by natural  
14 selection, be approximately 1 when all nonsynonymous mutations are neutral, and can  
15 be greater than 1 when a substantial proportion of nonsynonymous mutations are  
16 advantageous.

17 Two recent analyses of dN/dS patterns in cancer genomes found that for most  
18 non-driver genes dN/dS is ~1 and that only 0.1 - 0.4% of genes exhibit detectable  
19 negative selection (dN/dS < 1)<sup>1,2</sup>. This differs substantially from patterns in human  
20 germline evolution where most genes show signatures of negative selection (dN/dS ~  
21 0.4)<sup>1</sup>. Two explanations for this difference have been posited. First, the vast majority of  
22 nonsynonymous mutations may not be deleterious in somatic cellular evolution despite  
23 their deleterious effects on the organism. While most genes may be critical for proper  
24 organismal development and multicellular functioning, they may not be essential for  
25 clonal tumor growth. In this hypothesis, negative selection (dN/dS < 1) should be  
26 observed only within essential genes and absent elsewhere (dN/dS ~ 1). While  
27 appealing in principle, most germline selection against nonsynonymous variants  
28 appears to be driven by protein misfolding toxicity<sup>4,5</sup>, in addition to gene essentiality.  
29 These damaging folding effects ought to persist in somatic evolution.

30 A second hypothesis is that even though many nonsynonymous mutations are  
31 deleterious in somatic cells, natural selection fails to remove them. One possible reason  
32 for this inefficiency is the unique challenge of evolving without recombination. Unlike  
33 sexually-recombining germline evolution, tumors must evolve under genome-wide  
34 linkage that creates interference between mutations, known as Hill-Robertson  
35 interference, which reduces the efficiency of natural selection<sup>3</sup>. Without recombination  
36 to link and unlink combinations of mutations, natural selection must act on entire  
37 genomes — not individual mutations — and select for clones with combinations of  
38 mutations of better aggregate fitness. Thus, advantageous drivers may not fix in the  
39 population, if they arise on an unfit background, and conversely, deleterious passengers  
40 can fix, if they arise on particularly fit backgrounds.

41 The inability of asexuals to eliminate deleterious passengers is driven by two Hill-  
42 Robertson interference processes: *hitchhiking* and *Muller's ratchet* (Fig. 1A). Hitchhiking  
43 occurs when a strong driver arises within a clone already harboring several passengers.  
44 Because these passengers cannot be unlinked from the driver under selection, they are

1 carried with the driver to a greater frequency in the population. Muller's ratchet is a  
 2 process where deleterious mutations continually accrue within different clones in the  
 3 population until natural selection is overwhelmed. Whenever the fittest clone in an  
 4 asexual population is lost through genetic drift, the maximum fitness of the population  
 5 declines to the next most fit clone (Fig. 1A). The rate of hitchhiking and Muller's ratchet  
 6 both increase with the genome-wide mutation rate<sup>6,7</sup>. Therefore, the second hypothesis  
 7 predicts that selection against deleterious passengers should be more efficient ( $dN/dS <$   
 8  $1$ ) in tumors with lower mutational burdens.

9 Here, we leverage the 10,000-fold variation in tumor mutational burden across 50  
 10 cancer types to quantify the extent that selection attenuates, and thus becomes more  
 11 inefficient, as the mutational burden increases. Using  $dN/dS$ , we find that selection  
 12 against deleterious passengers and in favor of advantageous drivers is most efficient in  
 13 low mutational burden cancers. Furthermore, low mutational burden cancers exhibit  
 14 efficient selection across cancer subtypes, as well as within subclonal mutations,  
 15 homozygous mutations, somatic copy-number alterations, and essential genes.  
 16 Additionally, high-mutational burden tumors appear to mitigate this deleterious load by  
 17 upregulating protein folding and degradation machinery. Finally, using evolutionary  
 18 modeling, we find that Hill-Robertson interference alone can explain these observed  
 19 patterns of selection. Modeling predicts that most cancers carry a substantial  
 20 deleterious burden (~40%) that necessitates the acquisition of multiple strong drivers  
 21 (~5) in malignancies that together provide a benefit of ~130%. Collectively, these results  
 22 explain why signatures of selection are largely absent in cancers with elevated  
 23 mutational burdens and indicate that the vast majority of tumors harbor a large  
 24 mutational load.  
 25

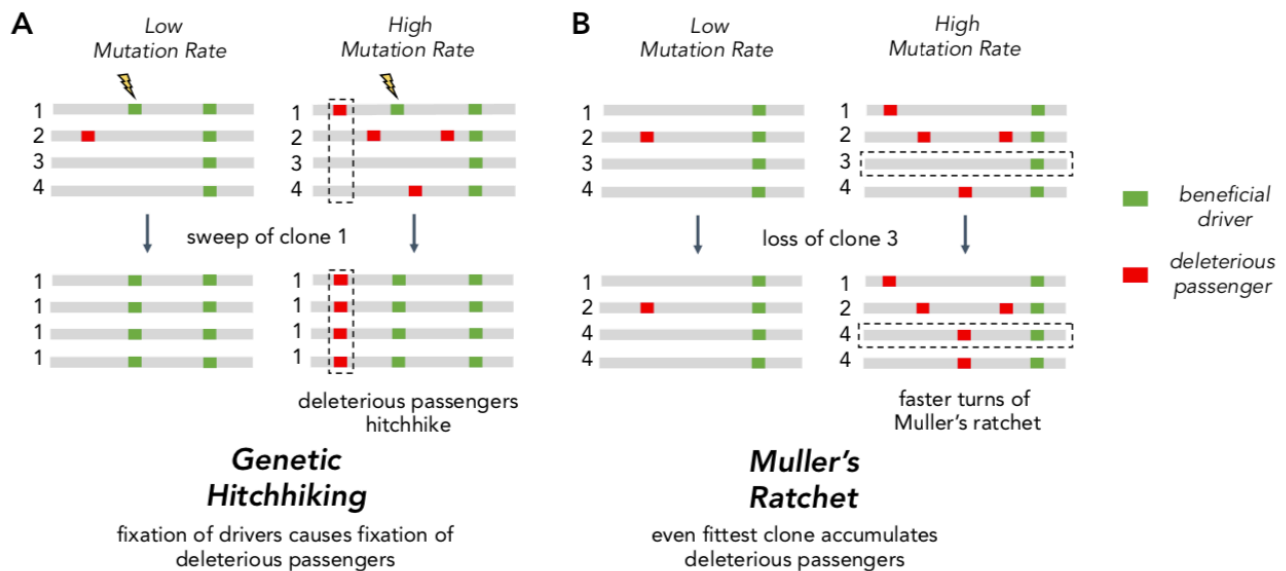

26

27

28 **Figure 1. Two Hill-Robertson interference processes that accumulate deleterious**  
 29 **mutations at high mutation rates. (A) Genetic hitchhiking.** Each number identifies a  
 30 different segment of a clone genome within a tumor. *De novo* beneficial driver mutations

1 that arise in a clone can drive other mutations (passengers) in the clone to high  
2 frequencies (black dotted column). If the passenger is deleterious, both beneficial  
3 drivers and deleterious passengers can accumulate. **(B) Muller's ratchet.** As the  
4 mutation rate within a tumor increases, deleterious passengers accumulate on more  
5 clones. If the fittest clone within the tumor is lost through genetic drift (black dotted row),  
6 the overall fitness of the population will decline.

7

## 8 **Results**

9 **A nonparametric null model of mutagenesis in cancer.** Mutational processes in  
10 cancers are heterogeneous, which can bias  $dN/dS$  estimates of selective pressures. To  
11 overcome this issue, it is essential to design a bias-corrected version of  $dN/dS$  in which  
12 observed counts are compared to what is expected under neutral evolution. It is also  
13 important to consider that mutational biases are often specific to cancer type and  
14 genomic region. Such corrections are generally accomplished using parametric  
15 mutation models, which can become very complex in cancer (exceeding 5,000  
16 parameters in some cases<sup>1,8</sup>).

17 To circumvent these issues, we use a permutation-based, nonparametric  
18 (parameter-free) estimation of  $dN/dS$ . In this approach, every observed mutation is  
19 permuted while preserving the gene, patient samples, specific base change (e.g. A>T)  
20 and its tri-nucleotide context. Note that permutations do not preserve the codon position  
21 of a mutation and thus can change its protein coding effect (nonsynonymous vs  
22 synonymous). The permutations are then tallied for both nonsynonymous  $d_N^{(\text{permuted})}$  and  
23 synonymous  $d_S^{(\text{permuted})}$  substitutions (Fig. S1) and used as expected proportional values  
24 for the observed number of nonsynonymous  $d_N^{(\text{observed})}$  (or simply  $d_N$ ) and synonymous  
25  $d_S^{(\text{observed})}$  ( $d_S$ ) mutations in the absence of selection. The unbiased effects of selection  
26 on a gene,  $dN/dS$ , is then:

$$27 \quad \frac{dN}{dS} = \frac{d_N^{(\text{observed})} / d_N^{(\text{permuted})}}{d_S^{(\text{observed})} / d_S^{(\text{permuted})}}$$

28 For all cancer types and patient samples,  $P$ -values and confidence intervals are  
29 determined by bootstrapping patient samples. Note that this permutation procedure will  
30 account for gene and tumor-level mutational biases (e.g. neighboring bases<sup>9</sup>,  
31 transcription-coupled repair, S phase timing<sup>10</sup>, mutator phenotypes) and their  
32 covariation. We confirmed that this approach accurately measures selection in the  
33 presence of simulated mutational biases (Methods, Fig. S2) and variation in gene length  
34 (Fig. S3), and demonstrate that this approach identifies similar patterns of selection as  
35 parametric models (Fig. S3)<sup>1</sup>.

36 **Attenuation of selection in drivers and passengers for elevated mutational burden**  
37 **tumors.** We estimated  $dN/dS$  patterns in both driver and passenger gene sets across  
38 11,855 tumors from TCGA (whole-exome) and ICGC (whole-genome) aggregated over  
39 50 cancer types (Methods). We used the following four mutational tallies as a proxy for  
40 the genome-wide mutation rate: (1) the total number of mutations or tumor mutational

1 burden (TMB) (2) the total number of observed substitutions in both synonymous and  
2 nonsynonymous sites ( $d_N + d_S$ ) (Fig. 1), and (3) the total number of mutations in  
3 intergenic, and (4) intronic regions. All estimates are strongly correlated ( $R^2 > 0.97$ , Fig.  
4 S4).

5 In principle, only the last two tallies — the number of substitutions in intergenic or  
6 intronic regions — are orthogonal to  $dN/dS$ , and least likely to be biased by selection.  
7 However, these measures can only be applied to whole-genome datasets, which  
8 constitute only 15% of sequenced samples. Therefore, for most of the analyses, we  
9 used the second measure ( $d_N + d_S$ ) to define mutational burden, while being cognizant  
10 that the analysis could be complicated by the fact that the same mutation tallies are  
11 used for both the x-axis ( $d_N + d_S$ ) and y-axis ( $dN/dS$ ). We note that this interdependence  
12 leads to a slight underestimation of the degree of purifying selection, rendering our  
13 analysis conservative (Fig. S5, Methods).

14 Consistent with the inefficient selection model, whereby selection fails to  
15 eliminate deleterious mutations in high mutational burden tumors, we observe pervasive  
16 selection against passengers exclusively in cancers with low mutational burdens ( $dN/dS$   
17  $\sim 0.4$  in tumors with mutational burden  $\leq 3$ , while  $dN/dS \sim 0.9$  in tumors with mutational  
18 burden  $> 10$ , Fig. 2A). We observed little negative selection in passengers when  
19 aggregating tumors across all mutational burdens ( $dN/dS = 0.88$ ), which is broadly  
20 similar to previous estimates<sup>1,2,8,11</sup>. Also consistent with the inefficient selection model,  
21 drivers exhibit a similar but opposing trend of attenuated selection at elevated  
22 mutational burdens ( $dN/dS \sim 3.5$  when mutational burden  $\leq 3$  and gradually declines to  
23  $\sim 1.38$  when mutational burden  $> 100$ ). This pattern is not specific to oncogenes or  
24 tumor suppressors (Fig. S6). While the attenuation of selection against passengers in  
25 higher mutational burden tumors is a novel discovery, this pattern among drivers has  
26 been reported previously<sup>1</sup>. We confirmed that these patterns are robust to the choices  
27 that we made in our analysis pipeline, including the: (1) somatic mutation calling  
28 algorithm (Mutect2 and MC3 SNP calls<sup>12</sup>, Fig. S3B), (2) dataset (TCGA<sup>13</sup>, ICGC<sup>14</sup>,  
29 COSMIC<sup>15</sup> and an additional independent validation cohort; Fig. S3B and Fig. S3D), (3)  
30 effects of germline SNP contamination (Fig. S7), (4) choice of driver gene set (Bailey et  
31 al<sup>16</sup>, IntOGen<sup>17</sup>, and COSMIC<sup>15</sup>, Fig. S3B and Fig. S8), (5) mutational burden metric  
32 (Fig. S3A), (6) differences in tumor purity and thresholding (Fig. S9), and (7) null model  
33 of mutagenesis (dNdScv, Fig. S3C & S10)<sup>1</sup> (Methods).

34 If negative selection is more pronounced in low mutational burden tumors, then  
35 the nonsynonymous mutations observed should also be less functionally consequential.  
36 By annotating the functional effect of all missense mutations using PolyPhen2<sup>18</sup> (Fig  
37 2B), we indeed find that observed nonsynonymous passengers are less damaging in  
38 low mutational burden cancers. Similarly, driver mutations become less functionally  
39 consequential as mutational burden increases, as expected for mutations experiencing  
40 inefficient positive selection (Fig 2B). Together these two trends provide additional and  
41 orthogonal evidence that selective forces on nonsynonymous mutations are more  
42 efficient in low mutational burden cancers.

43 Since all mutational types experience Hill-Robertson interference, attenuated  
44 selection should also persist in Copy Number Alterations (CNAs). Since CNAs cannot

1 be partitioned into synonymous and nonsynonymous events, but can still disrupt protein  
2 function and dosage, we quantified selection in CNAs using two alternative measures:  
3 Breakpoint Frequency<sup>19</sup> and Fractional Overlap<sup>20</sup>. For both measures, we compare the  
4 number of CNAs that either terminate (Breakpoint Frequency) within or partially overlap  
5 (Fractional Overlap) Exonic regions of the genome relative to non-coding (Intergenic  
6 and Intronic) regions ( $dE/dI$ , See Methods). Like  $dN/dS$ ,  $dE/dI$  is expected to be  $<1$  in  
7 genomic regions experiencing negative selection,  $>1$  in regions experiencing positive  
8 selection (e.g. driver genes), and approximately 1 when selection is absent or inefficient  
9 (Fig. S23). Using  $dE/dI$ , we observe attenuating selection in both driver and passenger  
10 CNAs as the total number of CNAs increases for both Breakpoint Frequency (Fig. 2C)  
11 and Fractional Overlap (Fig. S11). While CNAs of all lengths experience attenuated  
12 selection, CNAs longer than the average gene length ( $>100$  KB) experience greater  
13 selective pressures in drivers ( $p < 10^{-4}$ ).

14 Collectively, these results suggest that tumors with elevated mutational burdens  
15 carry a substantial deleterious load. Since nonsynonymous mutations are thought to be  
16 primarily deleterious by inducing protein misfolding<sup>4,5</sup>, we tested whether an increase in  
17 the number of passenger mutations in tumors would lead to elevated protein folding  
18 stress, and, in turn, drive the upregulation of heat shock and protein degradation<sup>21</sup>  
19 pathways in cancer<sup>22</sup>. Indeed, gene expression of HSP90, Chaperonins, and the  
20 Proteasome does increase across the whole range of SNV (weighted  $R^2$  of 0.83, 0.77,  
21 and 0.75 respectively) and CNA burdens (weighted  $R^2$  of 0.78, 0.87 and 0.84,  
22 respectively) (Fig. 2G and S22). This trend persists across cancer types for SNVs and  
23 CNAs (Fig. S22). Importantly, expression of these gene sets increases across the whole  
24 range of mutational burdens, even after  $dN/dS$  approach 1. This result presents  
25 additional evidence that passengers continue to impart a substantial cost to cancer  
26 cells, even in high mutational burden tumors, which must be overcome for tumors to  
27 progress.

1

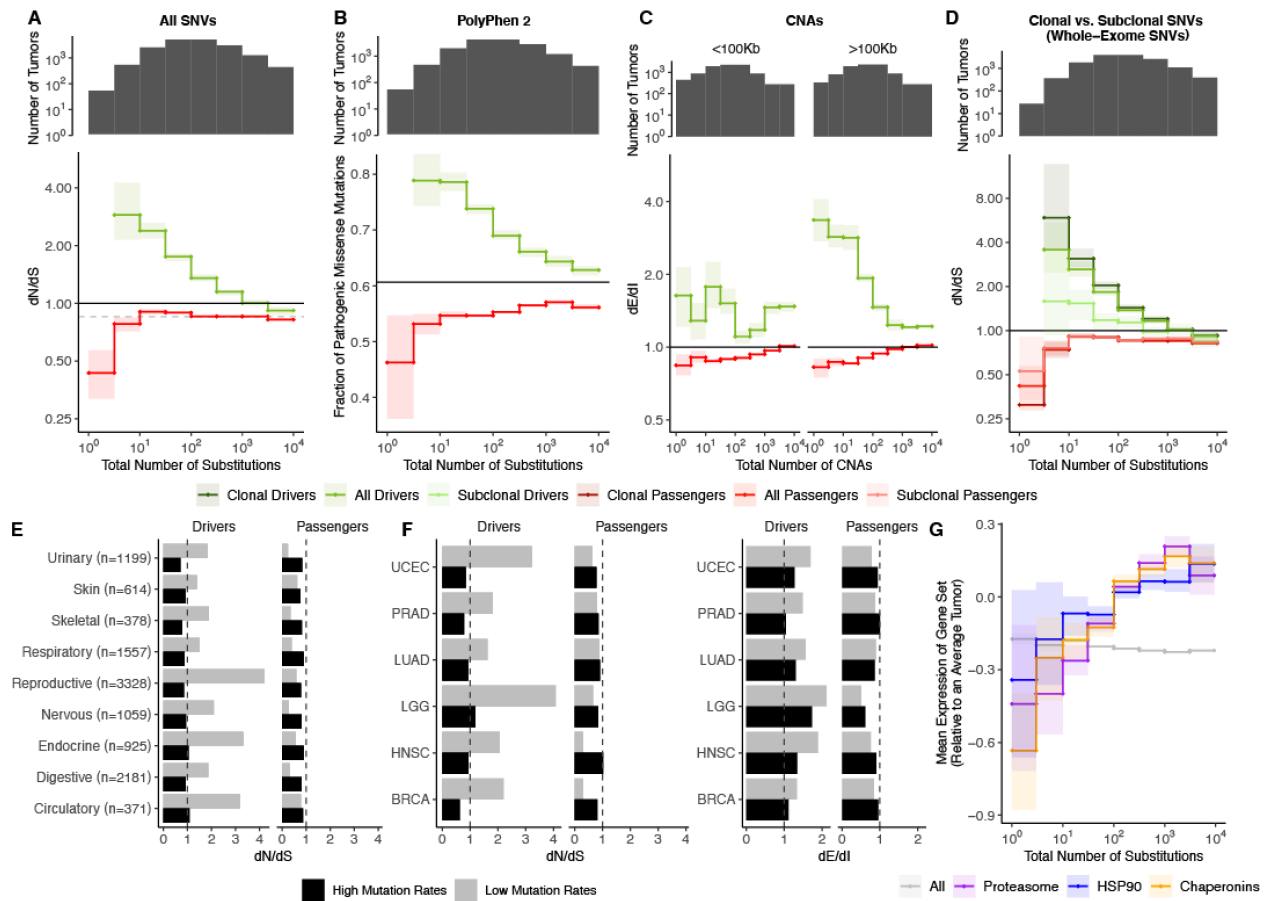

2

3 **Figure 2. Attenuation of selection and increased protein folding stress in high**  
4 **mutation load tumors. (A)** *dN/dS* of passenger (red) and driver (green) gene sets  
5 within 11,855 tumors (ICGC and TCGA) stratified by total number of substitutions  
6 present in the tumor ( $d_N^{(observed)} + d_S^{(observed)}$ ). A *dN/dS* of 1 (solid black line) is expected  
7 under neutrality. Dashed gray line denotes pan-cancer genome-wide *dN/dS*. **(B)**  
8 Fraction of pathogenic missense mutations, annotated by PolyPhen2, in the same driver and  
9 passenger gene sets also stratified by total number of substitutions. Black line  
10 denotes the pathogenic fraction of missense mutations across the entire human  
11 genome. **(C)** Breakpoint frequency of CNAs that reside within exonic (dE) to intergenic  
12 (dI) regions within putative driver and passenger gene sets (identified by GISTIC 2.0,  
13 Methods) in tumors stratified by the total number of CNAs present in each tumor and  
14 separated by CNA length. Solid black line of 1 denotes values expected under  
15 neutrality. **(D)** *dN/dS* of clonal (VAF > 0.2; darker colors) and subclonal (VAF < 0.2;  
16 lighter colors) passenger and driver gene sets in tumors stratified by the total number of  
17 substitutions. A *dN/dS* of 1 (solid black line) is expected under neutrality. **(A-D)**  
18 Histogram counts of tumors within mutational burden bins are shown in the top panels.  
19 **(E)** Driver and passenger *dN/dS* values of the highest and lowest defined mutational  
20 burden bin in broad anatomical sub-categories. **(F)** Same as **(E)**, except for all specific  
21 cancer subtypes with  $\geq 500$  samples. **(G)** Z-scores of median gene expression within all  
22 genes, HSP90, Chaperonin and Proteasome gene sets averaged across patients



1 (relative to an average tumor) stratified by the total number of substitutions. All shaded  
2 error bars are 95% confidence intervals determined by bootstrap sampling.

3 **Strong selection in low mutational burden tumors cannot be explained by**  
4 **mutational timing, gene function, nor tumor type.** We next tested alternative  
5 hypotheses to the inefficient selection model. We considered the possibility that  
6 selection is strong only during normal tissue development, but absent after cells have  
7 transformed to malignancy. This would disproportionately affect low mutational burden  
8 tumors, as a greater proportion of their mutations arise prior to tumor transformation. If  
9 true, then attenuated selection should be absent in sub-clonal mutations, which must  
10 arise during tumor growth. However, selection clearly attenuates for the subset of likely  
11 subclonal mutations with Variant Allele Frequency (VAF) below 20% (Fig. 2D & S12).  
12 Although selection attenuates in drivers and passengers in both sub-clonal and clonal  
13 mutations, selection is weaker in both drivers and passengers with lower VAFs. Weaker  
14 efficiency of selection among less frequent polymorphisms is expected under a range of  
15 population genetic models<sup>23</sup> and especially so in rapidly-expanding, spatially-  
16 constrained cancers<sup>24</sup>. In addition, heterozygous mutations, which are only partially-  
17 dominant<sup>25</sup>, are also expected to exhibit lower VAFs.

18 Next, we considered and rejected the possibility that attenuated selection is  
19 limited to particular types of genes. We first annotated our observed mutations by  
20 different functional categories and Gene Ontology (GO) terms<sup>26</sup> and find that negative  
21 selection is not specific to any particular gene functional category, and specifically not  
22 limited to essential or housekeeping genes — a key prediction of the ‘weak selection’  
23 model<sup>1</sup> (Fig. S13,  $p < 0.05$ , Wilcoxon signed-rank test).

24 Finally, we found that these patterns of attenuated selection persist across  
25 cancer subtypes for both SNVs and CNAs. We calculated  $dN/dS$  in tumors grouped by  
26 nine broad anatomical sub-categories (e.g. neuronal) and 50 subtype classifications  
27 <sup>27</sup>(Fig. 2E-F). We find that patterns of attenuated selection in SNVs persists in the broad  
28 and specific (drivers  $p = 1.4 \times 10^{-5}$ , passengers  $p = 1.3 \times 10^{-2}$ , Wilcoxon signed-rank  
29 test; Fig. S14) classification schemes. Furthermore,  $dE/dI$  measurements of CNAs  
30 exhibit these same patterns of selection in broad (Fig. S15) and specific subtypes (Fig.  
31 2F; drivers  $p < 10^{-6}$  and passengers  $p = 7.3 \times 10^{-4}$ ). Collectively, these results strongly  
32 support the inefficient selection model and argue that the observed patterns must be  
33 due to a universal force in tumor evolution.

34 **Evolutionary modeling estimates the fitness effects of drivers and passengers,**  
35 **and rate of Hill-Robertson interference processes.** Our findings indicate that  
36 selection consistently attenuates in both drivers and passengers across all cancers as  
37 mutational burden increases. To determine whether Hill-Robertson interference alone  
38 can explain these findings, we modeled tumor progression as a simple evolutionary  
39 process with advantageous drivers and deleterious passengers. We then used  
40 Approximate Bayesian Computation (ABC) to compare these simulations to observed  
41 data and infer the mean fitness effects of drivers and passengers.

42 Our evolutionary simulations model a well-mixed population of tumor cells that  
43 can randomly acquire advantageous drivers and deleterious passengers during cell

1 division<sup>28</sup>. The product of the individual fitness effects of these mutations determines the  
2 relative birth and death rate of each cell, which in turn dictates the population size  $N$  of  
3 the tumor. If the population size of a tumor progresses to malignancy ( $N > 1,000,000$ )  
4 within a human lifetime ( $\leq 100$  years), the accrued mutations and patient age are  
5 recorded. The mutation rate of each simulated tumor is randomly-sampled from a broad  
6 range ( $10^{-12}$  to  $10^{-7}$  mutations  $\cdot$  nucleotide<sup>-1</sup>  $\cdot$  generation<sup>-1</sup>, Methods).

7 Figure 3A illustrates the ABC procedure. To compare our model to observed  
8 data, we simulated an exponential distribution of fitness effects with mean fitness values  
9 that spanned a broad range ( $10^{-2}$  -  $10^0$  for driver and  $10^{-4}$  -  $10^{-2}$  for passengers,  
10 Methods). We summarized observed and simulated data using statistics that capture  
11 three relationships: (i) the dependence of driver and passenger  $dN/dS$  rates with  
12 mutational burden, (ii) the rate of cancer age-incidence (SEERs database<sup>29</sup>), and (iii)  
13 the distribution of mutational burdens (summary statistics of (ii) and (iii) were based on  
14 theoretical parametric models<sup>30</sup>, Methods, Fig. S16 & S17). We then inferred the  
15 posterior probability distribution of mean driver fitness benefit and mean passenger  
16 fitness cost using a rejection algorithm that we validated using leave-one-out Cross  
17 Validation (Methods, Fig. S18).

18 Using this approach, the Maximum Likelihood Estimate (MLE) of mean driver  
19 fitness benefit is 18.8% (Fig. 3B), while the MLE of passenger mean fitness cost is  
20 0.96% (Fig. 3C). Simulations with these MLE values agree well with all observed data  
21 (Fig. 3D-F, Pearson's  $R = 0.95, 0.80, 0.99, 0.97$  for driver  $dN/dS$ , passenger  $dN/dS$ ,  
22 Age-Incidence, and Mutational Burden respectively).

23 While Hill-Robertson interference alone explains  $dN/dS$  rates in the passengers  
24 well, the simulations most consistent with observed data still exhibited consistently  
25 higher  $dN/dS$  rates in drivers (Fig. 3D). We tested whether positive selection on  
26 synonymous mutations within driver genes could explain this discrepancy. Indeed, we  
27 find that a model incorporating synonymous drivers agrees modestly better with  
28 observed statistics ( $p = 0.043$ , ABC posterior probability). The best-fitting model predicts  
29 that  $\sim 10\%$  of synonymous mutations within driver genes experience positive selection,  
30 which is consistent with previous estimates for human oncogenes<sup>31</sup> (Methods, Fig. 3D,  
31 S19). Furthermore, we observe additional evidence of selection and codon bias in  
32 synonymous drivers exclusive to low mutational burdens (TCGA samples, Methods, Fig.  
33 S19). Lastly, we considered and rejected the possibility that the attenuation of selection  
34 in drivers could be due to a diminishing benefit of additional drivers (akin to a 5-hit  
35 multistage model<sup>30</sup>, Methods,  $p > 0.5$ , ABC posterior probability).

36 Our results indicate that rapid adaptation through natural selection – acting on  
37 entire genomes, rather than individual mutations – is pervasive in all tumors, including  
38 those with elevated mutational burdens. Given the quantity of drivers and passengers  
39 observed in a typical cancer (TCGA), we estimate that cancer cells are in total  $\sim 90\%$   
40 fitter than normal tissues (130% total benefit of drivers, 40% total cost of passengers).  
41 These values are larger than estimates from evolutionary models that assume that  
42 passengers are neutral ( $\sim 0.001\%$ )<sup>32</sup>, but of the same order of magnitude as estimates  
43 from models that assumed passengers were deleterious ( $\sim 10\%$ )<sup>33</sup>. Furthermore, direct  
44 experimental measurements in Cre-inducible mouse models of tumorigenesis also find

1 similarly strong driver benefits at 1-27%<sup>34–36</sup>. A median of five drivers accumulate per  
 2 tumor in these simulations – also consistent with estimates from age-incidence curves  
 3 and known hallmarks of cancer<sup>37</sup>. Lastly, the mutation rates of tumors that could  
 4 progress to cancer in our model also recapitulate observed mutation rates in human  
 5 cancer<sup>38</sup> (median  $3.7 \times 10^{-9}$ , 95% Interval  $1.1 \times 10^{-10}$  -  $8.2 \times 10^{-8}$ , Fig. S20).  
 6

7 Most notably, aggregate passenger load confers a fitness cost of ~40%. While  
 8 this collective burden is large, the individual fitness effects of accumulated passengers  
 9 in these simulations (mean 0.8%) are similar to observed fitness costs in cancer cell  
 10 lines (1 - 3%)<sup>39</sup> and the human germline (0.5%)<sup>40</sup>. These passengers accumulated  
 11 primarily via Muller’s Ratchet, while only ~14% accumulated via hitchhiking (inferred  
 12 using population genetics theory<sup>28</sup> and MLE fitness effects, Methods, Fig. S21).  
 13

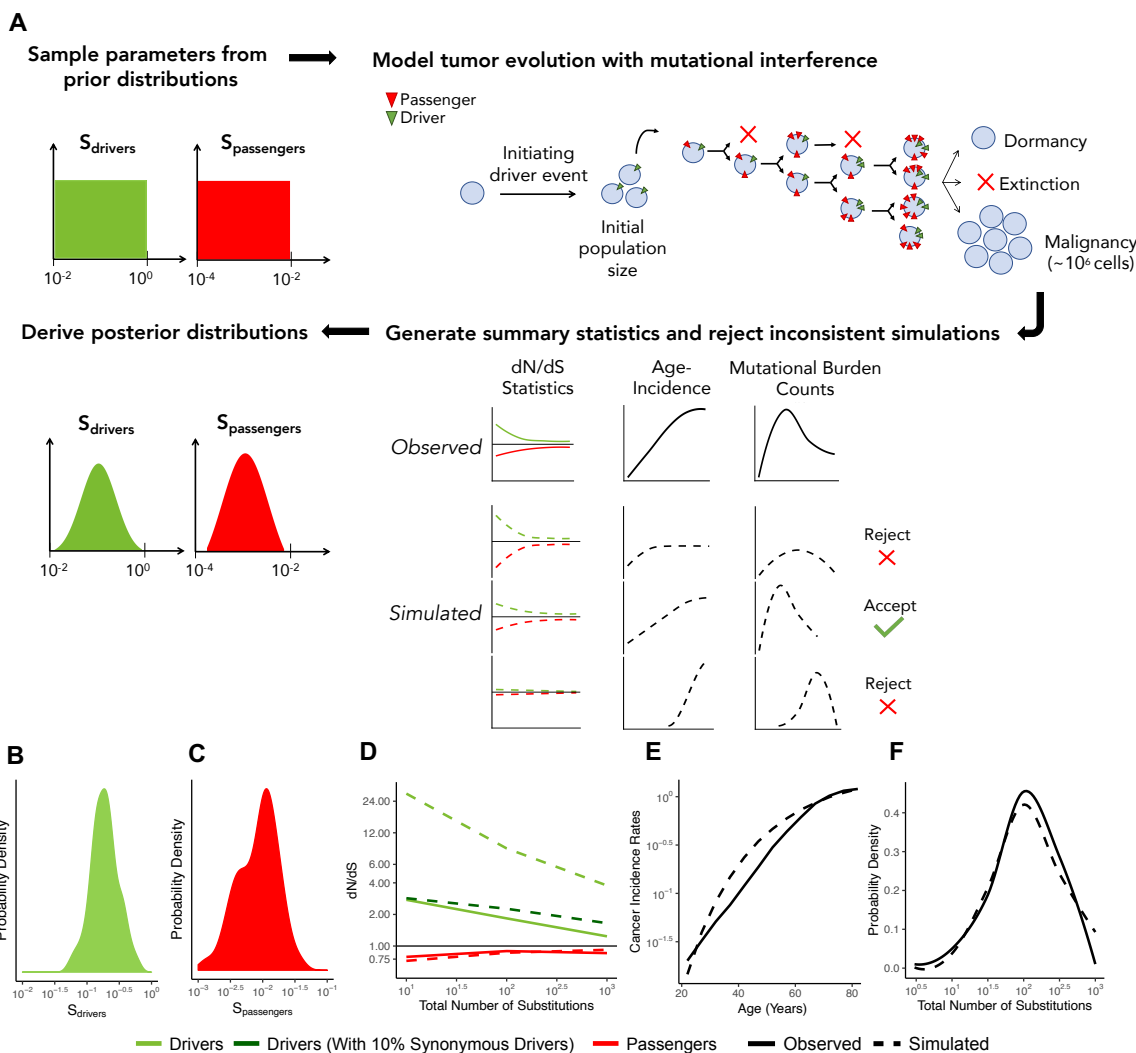

14

15 **Figure 3. ABC procedure estimates the strength of selection in passengers and**  
 16 **drivers. (A)** Schematic overview of the ABC procedure used. A model of tumor  
 17 evolution with genome-wide linkage contains two parameters —  $S_{\text{drivers}}$  (mean fitness

1 benefit of drivers) and  $s_{\text{passengers}}$  (mean fitness cost of passengers) — sampled over  
2 broad prior distributions of values. Simulations begin with an initiating driver event that  
3 establishes the initial population size of the tumor. The birth rate of each individual cell  
4 within the tumor is determined by the total accumulated fitness effects of drivers and  
5 passengers. If the final population size of the tumor exceeds one million cells within a  
6 human lifetime (100 years), patient age and accrued mutations are recorded. Summary  
7 statistics of four relationships are used to compare simulations to observed data: (i)  
8  $dN/dS$  rates of drivers and (ii) passengers across mutational burden, (iii) rates of cancer  
9 incidence versus age, and (iv) the distribution of mutational burdens. Simulations that  
10 excessively deviate from observed data are rejected (Methods). **(B-C)** Inferred posterior  
11 probability distributions of  $s_{\text{drivers}}$  and  $s_{\text{passengers}}$ . The Maximum Likelihood Estimate  
12 (MLE) of  $s_{\text{drivers}}$  is 18.8% (green, 95% CI [13.3, 32.7]), and the MLE of  $s_{\text{passengers}}$  is  
13 0.96% (green, 95% CI [0.28, 3.6%]). **(D-F)** Comparison of best-fitting simulations (MLE  
14 parameters, dashed lines) to observed data (solid lines). **(D)**  $dN/dS$  rates of passengers  
15 (red) and drivers (light green) for simulated and observed data versus mutational  
16 burden. A model where 10% of synonymous mutations within drivers experience  
17 positive selection (dark green) was also considered. **(E)** Cancer incidence rates for  
18 patients above 20 years of age. **(F)** Distribution of the mutational burdens of tumors.

19

## 20 Discussion

21

22 Here we argue that signals of selection are largely absent in cancer because of  
23 the inefficiency of selection and not because of weakened selective pressures. In low  
24 mutational burden tumors ( $\leq 10$  total substitutions per tumor), increased selection for  
25 drivers and against passengers is observed and ubiquitous: in SNVs and CNAs; in  
26 heterozygous, homozygous, clonal, and subclonal mutations; and in mutations  
27 predicted to be functionally consequential. These trends are not specific to essential or  
28 housekeeping genes. Importantly, these patterns persist across broad and specific  
29 tumor subtypes. Collectively, these results suggest that inefficient selection is generic to  
30 tumor evolution and that deleterious load is a nearly-universal hallmark of cancer.

31 Importantly, these patterns of selection are missed when  $dN/dS$  rates are not  
32 stratified by mutational burden. Since only 0.1% of mutations in TCGA and ICGC reside  
33 within low mutational burden tumors (4% of all tumors,  $N=563$ ), the  $dN/dS$  of  
34 passengers at low mutational burdens ( $\sim 0.4 - 0.8$ ) do not appreciably alter the pan-  
35 cancer  $dN/dS$  of passengers (0.88 in our study, 0.82 — 0.98 in <sup>1,2,8,11</sup>). Thus, these  
36 patterns can only be detected now given the vast amounts of available cancer  
37 sequencing data. While only 4% of tumors exhibit substantial negative selection,  
38 selection in drivers, selection on CNAs, and expression patterns of chaperones and  
39 proteasome components all show a continuous response to deleterious passenger load  
40 across a broad range of mutational burdens. Collectively, this suggests that passengers  
41 continue to be deleterious even in high mutational burden tumors. Nevertheless, we  
42 believe that low mutational burden tumors are uniquely valuable for identifying genes  
43 and pathways under positive and negative selection.

1           Using a simple evolutionary model, we show that Hill-Robertson Interference  
2 alone can explain this ubiquitous trend of attenuated selection in both drivers and  
3 passengers.  $dN/dS$  rates attenuate in drivers because the background fitness of a clone  
4 becomes more important than the fitness effects of an additional driver at elevated  
5 mutation rates. Furthermore, these simulations indicate that, despite  $dN/dS$  patterns  
6 approaching 1 in tumors with elevated mutational burdens, passengers are not  
7 effectively neutral ( $Ns > 1$ ). Instead, passengers confer an individually-weak, but  
8 collectively-substantial fitness cost of ~40% that measurably impacts tumor progression.  
9 While this simple evolutionary model does not explicitly incorporate many known  
10 aspects of tumor biology (e.g. haploinsufficiency, see Table S2), we note that  
11 selection's efficiency in cancer is further reduced when spatial constraints are  
12 considered<sup>24</sup>.

13           The functional explanation for why passengers in cancer are deleterious is  
14 unknown. In germline evolution, mutations are believed to be primarily deleterious  
15 because of protein misfolding<sup>4,5</sup>. Deleterious passengers in somatic cells should confer  
16 similar effects. Indeed, we find that elevated mutational burden tumors may buffer the  
17 cost of deleterious mutations by upregulating multiple heat-shock pathways. However,  
18 deleterious passengers may carry additional costs to cancers (e.g. immunoediting<sup>41</sup>) or  
19 be buffered by additional mechanisms. Understanding and identifying how tumors  
20 manage this deleterious burden should identify new cancer vulnerabilities that enable  
21 new therapies and better target existing ones<sup>41-43</sup>.

22

## 23 **Acknowledgements**

24 We thank Judith Frydman for her contribution on the heat shock response analysis,  
25 Monte Winslow for his contribution on cancer subtype analysis, Donate Weghorn for her  
26 contribution on the interdependence of  $dN/dS$  and mutational burden, Leonid Mirny,  
27 Grant Kinsler, Gabor Boross, Chuan Li, Alison Feder, Eliot Cowan and other members  
28 of the Petrov and Curtis labs for helpful comments and discussions. This work is  
29 supported by NIH grants T32-HG000044-21, E25-CA180993; the Director's Pioneer  
30 Award DP1-CA238296 to C.C.; R01-CA207133, R35-GM118165, and R01-CA231253  
31 to D.A.P.; and K99-CA226506 to C.D.M.

32

33

## 1 References

## 2 Methods & Supplementary Materials

3

4 **Data Availability.** Exonic, open-access SNV calls (WES) of 10,486 cancer patients in (The  
5 Cancer Genome Atlas) TCGA were downloaded from the Multi-Center Mutation Calling in  
6 Multiple Cancers (MC3) project<sup>12</sup>. This repository uses a consensus of seven mutation-calling  
7 algorithms. Whole-Genome Sequencing SNV calls (WGS) of 1,830 patients were downloaded  
8 from the ICGC data portal in November 2018<sup>44</sup>. Supplemental analyses on the effect of variant  
9 callers, SNVs from exome and whole genome wide screens were downloaded on October 2016  
10 from the Catalog of Somatic Mutations in Cancer's (COSMIC) Mutant Export Census<sup>15</sup>.  
11 Expression data of SNVs were downloaded from the Genotype-Tissue Expression (GTEx)  
12 project (v7 release)<sup>45</sup>. All CNAs were downloaded from the COSMIC database on June 2015<sup>15</sup>.  
13 Gene expression data compared to CNAs was downloaded from the COSMIC database on  
14 September 2019. To validate our findings, additional WES and WGS SNV calls were  
15 downloaded from cBioPortal from 1,786 treatment-naive, tumor-normal sample pairs across 17  
16 studies of varying cancer types in February 2019. Formalin-Fixed Paraffin Embedded (FFPE)  
17 samples were removed.<sup>46,47,56–62,48–55</sup>

18 **Code Availability.** All code for the simulations, associated theoretical analysis, and generation  
19 of summary statistics will be made publicly available under the open-source MIT License upon  
20 publication. Code for simulations of tumor growth with advantageous drivers and deleterious  
21 passengers is currently available at <https://github.com/mirnylab/pdSim>.

22

23 **Mutation calling and quality controls.** Mutations were downloaded from online repositories  
24 that have already invested heavily in quality control. Multiple data repositories were used to  
25 ensure reproducibility. Post-processing was minimal to avoid engendering a particular result, and  
26 only excluded sequencing samples obtained from cell lines, or studies that did not report  
27 synonymous variants, or (on occasion) mutations within pseudogenes. These exclusions are  
28 described in greater detail below.

29 **Somatic Nucleotide Variants (SNVs).** Only consensus mutation calls from the PCAWG  
30 Consensus SNV-MNV caller were considered. Both missense and nonsense mutations are  
31 defined as nonsynonymous mutations. Frameshift, indels, and splice-site variants were not  
32 included in analyses. Samples without any synonymous or nonsynonymous mutations and  
33 unexpressed genes in either dataset were excluded. Note that there is no evidence of germline  
34 contamination by common SNPs (MAF > 5%) from 1,000 Genomes Project<sup>63</sup> (v 2015 Aug)  
35 using ANNOVAR<sup>64</sup> to annotate mutations in either datasets (Fig. S7). A final of 1,703 whole-  
36 genome and 10,152 whole-exome sequencing samples were used for the analyses in this paper.  
37 In SNV data collected from COSMIC, studies before 2010 that didn't report silent mutations,  
38 and cell lines were removed from analysis. Whole-exome SNVs in TCGA were also called using  
39 Mutect2<sup>65</sup> (Fig. S3B).

40 **Defining tumor burden.** We tested four different mutation burden metrics as a proxy for the  
41 genome-wide mutation rate: (1) the total number of observed mutations, (2) total number of  
42 substitutions in both synonymous and nonsynonymous sites ( $d_N^{(\text{observed})} + d_S^{(\text{observed})}$ ), (3) the total  
43 number of mutations in intergenic, and (4) intronic regions. Although only the last two  
44 definitions of mutational burden are completely independent to  $dN/dS$ , the vast majority of

1 samples (10,152 vs 1,703) are derived from whole-exome data. We note that all mutation rates  
 2 are strongly correlated to each other ( $R^2 > 0.97$ ). Because only  $d_N + d_S$  could be applied to WES  
 3 data — the majority of samples — and all metrics worked equally-well, we primarily used  $d_N +$   
 4  $d_S$  to measure mutational burden. Lastly, because  $dN/dS$  is undefined for tumors with no  
 5 synonymous mutations, we necessarily excluded these samples. We also excluded samples with  
 6 no nonsynonymous mutations so as to apply a symmetric filter on the data and because data  
 7 quality may be compromised in these samples. Inclusion of samples with zero synonymous  
 8 mutations or zero nonsynonymous mutations did not appreciably alter observed trends in the  
 9 TCGA and ICGC datasets (Fig. S5D).

10 **A Nonparametric Null Model of Mutagenesis to calculate  $dN/dS$ .** We assume that for any  
 11 particular tumor, mutation rates are constant across a gene for a particular tri-nucleotide context  
 12 and base change (e.g. C > G). Our procedure is inspired by Constrained Marginal Models (or  
 13 ‘edge switching’ in network analysis), whereby the marginal distributions of observations  
 14 aggregated over known confounding variables are preserved under permutation to create a null  
 15 distribution. In our application of this strategy, the marginal distributions of mutations (across  
 16 tri-nucleotide context, base change, gene, and tumor) remain preserved – as they would be in a  
 17 Constrained Marginal Model; however, we exhaustively consider every acceptable permutation  
 18 of the data. Because our approach is highly-constrained, these permutations are exhaustively  
 19 computable (median 36 alternatives per mutation). Thus, resampling is unnecessary.

20 Our null model presumes that all mutations of type  $i$ , defined by a tri-nucleotide context  
 21 and base change, arise with probability  $M_{igt}$  within each gene  $g$  and tumor  $t$ . For each gene, we  
 22 tally the total quantity of nonsynonymous mutations  $N_{ig}$  and synonymous mutations  $S_{ig}$ . Suppose  
 23 selection enriches or depletes nonsynonymous mutations within a gene and tumor by a rate  $\omega_{gt}$ .  
 24 The expected number of nonsynonymous and synonymous mutations within a particular tumor  
 25 and gene are  $E[d_N] = \omega_{gt} \sum_i M_{igt} N_{ig}$  and  $E[d_S] = \sum_i M_{igt} S_{ig}$  in the absence of selective  
 26 pressures on synonymous mutations. As with the main text,  $d_N$  and  $d_N^{(observed)}$  are used  
 27 interchangeably. Although  $M_{igt}$  is unknown,  $dN/dS$  statistics attempt to infer selection  
 28 nonetheless by noting that:

$$29 \quad \frac{E[d_N]}{E[d_S]} = \frac{\omega_{gt} \sum_i M_{igt} N_{ig}}{\sum_i M_{igt} S_{ig}} = \omega_{gt} \frac{\langle M_{igt}, N_{igt} \rangle}{\langle M_{igt}, S_{igt} \rangle} = \omega_{gt} \frac{\rho_{MN} \|M_{gt}\| \|N_{gt}\|}{\rho_{MS} \|M_{gt}\| \|S_{gt}\|} = \omega_{gt} \frac{\rho_{MN} \|N_{gt}\|}{\rho_{MS} \|S_{gt}\|}$$

30 Note that  $\rho_{AB} = \langle A, B \rangle / (\|A\| \|B\|)$  where  $\|A\| = \sqrt{\langle A, A \rangle}$  is the Pearson product-moment  
 31 correlation coefficient. When  $\rho_{MN} \approx \rho_{MS}$ ,

$$32 \quad \frac{E[d_N] / \|N\|_i}{E[d_S] / \|S\|_i} \approx \omega_{gt}$$

33 I.e.  $dN/dS$  is approximately equal to the selective pressures on nonsynonymous mutations when  
 34 the accessible nonsynonymous and synonymous loci are properly accounted and when the  
 35 correlation between mutational processes and nonsynonymous loci are roughly equivalent to the  
 36 correlation between mutational processes and synonymous loci. Traditionally, this assumption  
 37 was used to calculate  $dN/dS$ . To improve resolution of  $dN/dS$ , researchers have attempted to  
 38 account for these correlations using sophisticated parametric models of  $M_{igt}$ . An alternative  
 39 statistical approach, however, is to treat these correlations as nuisance parameters.

1 Constrained Marginal Models permute observed data in all possible manners that  
 2 preserve the underlying covariance structure of the data (e.g.  $\rho_{MN}$ ,  $\rho_{MS}$ ). In our particular case  
 3 of this method, we note that by definition,  $d_N^{permuted} = \sum_i (d_N^{observed}_i N_i + d_S^{observed}_i N_i)$ . Thus:

$$\begin{aligned}
 4 \quad \frac{E[d_N^{permuted}]}{E[d_S^{permuted}]} &= \frac{\sum_i (\omega_{gt} M_{igt} N_{igt}^2 + M_{igt} N_{igt} S_{igt})}{\sum_i (\omega_{gt} M_{igt} N_{igt} S_{igt} + M_{igt} S_{igt}^2)} \\
 5 &= \frac{\omega_{gt} \rho_{MN} \|M_{gt}\| \|N_{gt}\|^2 + \rho_{MN} \|M_{gt}\| \|N_{gt}\| \|S_{gt}\|}{\omega_{gt} \rho_{MS} \|M_{gt}\| \|S_{gt}\| \|N_{gt}\| + \rho_{MS} \|M_{gt}\| \|S_{gt}\|^2} \\
 6 &= \frac{\rho_{MN} \|N_{gt}\|}{\rho_{MS} \|S_{gt}\|}
 \end{aligned}$$

7 Hence, by dividing the observed mutations by all permutations, we eliminate the covariance of  
 8 mutational processes with available loci and, thus, measure  $\omega_{gt}$  directly for any particular gene-  
 9 tumor combination without mutational bias.

10 Unfortunately, because of the log-sum inequality, mutational bias can arise once cohorts  
 11 of genes and cohorts of tumor samples are binned. This problem is common to all  $dN/dS$   
 12 measures and is a consequence of the correlation of mutational biases with *selection* (i.e.  $\langle$   
 13  $M_{igt}, \omega_{gt} \rangle$ ) – not the correlation of mutational biases with one another, as these covariances are  
 14 already accounted-for in a Constrained Marginal Model. For example, if tri-nucleotide biases  
 15 covary linearly with gene-level biases, and are independent of tumor-level biases, then a  
 16 parametric estimate of  $M_{igt}$  may deconstruct  $M_{igt} = f(i, g, t, \rho_{ig})$ , where  $\rho_{ig}$  is the  
 17 covariation of tri-nucleotide mutational biases with gene-level biases. Nonetheless,  $\langle$   
 18  $M_{igt}, \omega_{gt} \rangle \propto \langle \rho_{ig}, \omega_{gt} \rangle$  will still be ignored. Indeed, this covariation of mutational processes  
 19 with selective forces is the focus of our current study: selection and genome-wide mutation rate  
 20 are correlated (i.e.  $\sum_t M_{igt} \omega_{gt} \neq 0$ ) because of Hill-Robertson Interference. Hence, the level at  
 21 which observed  $d_N$  values  $d_S$  are binned necessarily ignores covariation between mutational  
 22 processes and selection (in addition to any variation of  $\omega_{gt}$  within the bin). Another example of  
 23 this binning challenge arises when positive and negative selection act on different regions of the  
 24 same gene, which gene-level  $dN/dS$  binning can misinterpret as neutral evolution.

25 **Validation of nonparametric null model.** To confirm that our null model can accurately  
 26 estimate  $dN/dS$  even in the presence of extreme tri-nucleotide mutational biases, we simulated  
 27 artificial data where different COSMIC signatures<sup>15</sup> (SBS Signatures 1-9, v3) contribute to all of  
 28 the mutations. Permuted  $d_N$  and  $d_S$  tallies for each mutational context were simulated by  
 29 randomly sampling 1,000 genes with the same mutational context. The fraction of permuted  $d_N$   
 30 and  $d_S$  tallies for each mutational context was used as weighted probabilities to derive observed  
 31  $d_N$  and  $d_S$  tallies. To simulate negative selection,  $d_N$  counts were randomly removed from each  
 32 context at a rate  $1 - \omega_{gt}$  (e.g. a simulated ‘true’  $dN/dS$  of 0.8 in a cohort of samples indicates a  
 33 20% chance of nonsynonymous mutations being removed in the samples). These simulated (true)  
 34 rates were then compared to observed and permuted  $d_N$  and  $d_S$  tallies according to the  $dN/dS$   
 35 metric that we used throughout this study:



$$\frac{dN}{dS} = \frac{d_N^{(\text{observed})} / d_N^{(\text{permuted})}}{d_S^{(\text{observed})} / d_S^{(\text{permuted})}}$$

2 We confirmed that this approach accurately measures selection in the presence of simulated  
3 mutational biases (Fig. S2)

4 The number of permutations available for each gene/tri-nucleotide combination declines  
5 with gene length. Ultra-short genes may be too constrained for our permutation approach and  
6 underestimate selective pressures. While 12% of genes in our study harbored fewer than 10  
7 permutations per mutation, these genes contained only ~ 3% of all mutations, as these genes are  
8 exceptionally short. Exclusion of these genes did not appreciably alter observed  $dN/dS$  patterns  
9 (Fig. S3E).

10 Mutations can be permuted across every identical tri-nucleotide context within a  
11 particular gene or every identical tri-nucleotide context within a particular transcript. For  
12 differentially-spliced genes, transcript and gene annotations differ: transcripts are comprised of a  
13 subset of exons that define the whole gene. Hence, WES data directly sequences transcripts,  
14 which can be overlaid along the genome to infer genes. Because transcript annotations directly  
15 match WES data, which comprises 85% of available samples, we chose to constrain  
16 permutations at the transcript level (ENST) rather than the gene level (ENSG or Hugo  
17 Symbols)<sup>66</sup>. This choice does not appreciably affect  $dN/dS$  patterns (Fig. S25), however there is  
18 a slight universal shift towards a  $dN/dS$  rate of 1 (in both drivers and passengers) when  
19 permuting at the gene level. Presumably, this is because exons exclusive to rare splicing variants  
20 experience weaker selective pressures (and/or less transcription-coupled DNA repair.) The subtle  
21 differences between gene-level and transcript-level null models may explain the subtle difference  
22 in genome-wide  $dN/dS$  levels between our approach and the dNdScv model<sup>1</sup> (Fig. S3C).

23 Lastly, we note that binning nonsynonymous and synonymous mutations at the genome-  
24 wide level (e.g. drivers and passengers) provided the most robust estimates of  $dN/dS$  when  
25 bootstrapping observed tumor samples. Statistical power is insufficient when binning at the  
26 individual gene level. Bootstrapping also demonstrated that log transformation of  $dN/dS$  values  
27 increases statistical power, and thus was generally applied to  $dN/dS$  analyses in this study.

28 **A Parametric Null Model of Mutagenesis.** For comparison, we also calculated  $dN/dS$  using  
29 dNdScv<sup>67</sup> – a previously-published parametric null model of mutagenesis in cancer<sup>1</sup>. To compare  
30 both methods, dNdScv was ran globally and separately on samples stratified by the total number  
31 of substitutions using the following parameters:

32 `max_coding_muts_per_sample = Inf`  
33 `max_muts_per_gene_per_sample = Inf`

34 Global  $dN/dS$  values of all nonsynonymous mutations ( $w_{\text{all}}$ , reported by dNdScv) were used. This  
35 model reproduced our nonparametric  $dN/dS$  trends (Fig. S3) and was used to infer patterns of  
36 selection in synonymous mutations (Fig. S19). We note that stratifying tumors in TCGA into 20  
37 bins of equal sample-size (as was done in <sup>1</sup>), rather than evenly-spaced bins, averages-out a  
38 significant proportion of the negative selection observed in passengers, since low mutation  
39 burden tumors reside within the tail-end of the distribution (Fig. S10).

1 **Orthogonality of  $dN/dS$  with Mutational Burden and effects of excluding samples with no**  
2 **synonymous mutations.** Mutational burden is generally calculated as the total number of  
3 substitutions within a sample (i.e.  $d_N + d_S$ ), however these tallies are also used in our  
4 measurement of  $dN/dS$ . Hence, any interdependence of mutational burden with  $dN/dS$  could bias  
5 our understanding of the relationship between selection and genome-wide mutation rate. We  
6 consider the interdependence of these two measures by assuming that both  $d_N$  and  $d_S$  are  
7 Poisson-distributed with rate parameters  $\lambda_N$  and  $\lambda_S$ . The joint probability mass density of any  
8 combination of these two quantities is then:

9 
$$f(d_N, d_S) = \frac{\lambda_S^{d_N+d_S} r^{d_N} e^{-\lambda_S(r+1)}}{d_N! d_S! (1 - e^{-\lambda_S})}$$

10 Here,  $r = \lambda_N / \lambda_S$ . The expectation value of  $dN/dS$ , for any degree of selection versus any  
11 combination of nonsynonymous and synonymous mutation tallies can then be calculated simply  
12 by exhaustively summing over all combinations that arise with probability above machine  
13 precision. In Figure S5, we compare the variation in  $dN/dS$  for a typical genome under neutral  
14 selection or equally-balanced positive and negative selection ( $r = 2.8$ ) using the  $d_N + d_S$  and  $d_S$   
15 mutational burden metrics. We observe less deviation from expectation using  $d_N + d_S$  primarily  
16 because  $d_S$  alone is a poor proxy for the mutation rate — i.e. there are far fewer synonymous  
17 mutations to use to estimate the mutation rate.  $d_N + d_S$  did exhibit slightly greater bias in  
18 observed  $dN/dS$  relative to expectation, however this bias was small compared to the variation in  
19 estimates (<5% for mutational burdens greater than 2) and biased observed estimates towards  
20 increased values of  $dN/dS$ , which will only understate the degree of negative selection. Lastly,  
21 we note that because the genome-wide  $dN/dS$  is approximately 1, deviations from these  
22 theoretical calculations should be minimal.

23 We also tested the effects of this non-orthogonality of our approach in three additional  
24 ways. First, we investigated the correlation of mutational burden metrics mutation rate in our  
25 simulated tumors (see below) and found that  $d_N + d_S$  correlated most strongly with mutation rate  
26 (Fig. S5C). Next, we randomly-partitioned all protein-coding mutations into two necessarily-  
27 orthogonal halves: a half that defined the mutational burden and a half that was used for  
28 calculating  $dN/dS$ . This partitioning found that selection patterns persisted (Fig. S5B). Finally  
29 using WGS data, we compared  $dN/dS$  to measures of mutational burden that excluded data from  
30 protein-coding regions (all intergenic and all intronic mutations), which once again represents a  
31 completely-orthogonal comparison of  $dN/dS$  with mutational burden (Fig. S3).

32 **Identification of driver genes in cancer.** For all analysis using SNVs, unless explicitly stated, a  
33 comprehensive list of 299 pan-cancer driver genes derived from 26 computational tools was used  
34 to catalog driver genes<sup>16</sup>. Other pan-cancer driver gene sets tested were derived from COSMIC's  
35 Driver Gene Census<sup>15</sup> (downloaded on October 2016) and IntOGen's Cancer Drivers Database<sup>17</sup>  
36 (v2014.12) which contained 602 and 459 number of driver genes, respectively.

37 Many driver genes are associated with only particular tumor subtypes. To compare  
38 patterns of selection across cancer subtypes without increasing or decreasing the size of the list  
39 for each subtype, we chose to use a single set of driver genes for most analyses. This may  
40 understate the degree of positive selection in driver genes as mutations in these genes may be  
41 passengers in some tumor subtypes. In Fig. S8, we investigate patterns of selection using the top

1 100 driver genes identified for each tumor type and observe decreased signatures of positive  
2 selection overall in driver genes. Nevertheless, the patterns of attenuated selection in drivers and  
3 passengers remains. While tissue-type specific driver genes certainly exist, our results suggest  
4 that our statistical power to detect drivers still remains too limited to justify subdividing analyses  
5 by tumor type in many cases.

6 For all CNA analysis, GISTIC 2.0<sup>68</sup> was used to identify a set of genomic regions  
7 enriched for copy number gains and copy number losses using recommended settings with a  
8 confidence threshold of 0.9. CNAs used to identify these peaks were downloaded from the NIH  
9 Genomic Data Commons (GDC)<sup>27</sup> in the TCGA cohort. For each amplification peak, the closest  
10 gene was annotated as a putative Oncogene, and similarly the closest gene to each deletion peak  
11 was annotated as a putative Tumor Suppressor. The top 100 amplification peaks (oncogenes) and  
12 deletion peaks (Tumor Suppressors) were classified as drivers for each of the 32 tumor types.  
13 34% of identified driver genes appear in more than one tumor type, while 2.6% of identified  
14 driver genes appear in more than five tumor types.

15  
16 For both SNV and CNA analysis, passengers were defined as mutations that did not  
17 reside within driver genes. The vast majority of mutations are passengers, and their relative totals  
18 for both SNVs and CNAs are depicted in Fig. S24.

19 **Annotation of clonal and subclonal mutations.** Since TCGA contains SNVs with high  
20 coverage and available purity estimates, only MC3 SNVs (exclusive to TCGA) were used in this  
21 analysis (WGS read-depth is generally lower than WES read-depth). Variant allele frequencies  
22 (VAFs) were calculated per site as the number of mutant read counts divided by the total number  
23 of read counts. VAFs were adjusted for purity using calls made by ABSOLUTE<sup>27,69</sup>, collected  
24 from GDC. A VAF threshold of 0.2 was used to define ‘subclonal’ (< 0.2) vs ‘clonal’ (> 0.2)  
25 SNVs. Different VAF thresholds were considered (Fig. S12) and the choice of ‘clonal’  
26 thresholding did not impact the conclusions of this study.

27 **Polyphen2 analysis.** PolyPhen2 annotations in the MC3 SNP calls were used<sup>18</sup>. Only missense  
28 mutations that were categorized as either ‘benign’, ‘probably damaging’ or ‘possibly damaging’  
29 were used. The fraction of pathogenic missense mutations was calculated as the number of  
30 pathogenic mutations categorized as either “probably damaging” or “possibly damaging” divided  
31 by the total number of categorized mutations.

32 **Classification of genes by functional category.** To test for patterns of selection in functionally  
33 related genes, we annotated all mutations by different functional categories and Gene Ontology  
34 (GO) terms<sup>26</sup>. Oncogenes and tumor suppressors were annotated from a curated set of 99 high  
35 confidence cancer genes<sup>70</sup>. Essential genes were collected from a genome-wide CRISPR screen  
36 that identified genes required for proliferation and survival in a human cancer cell line<sup>71</sup>.  
37 Housekeeping genes were defined as genes with an exon that is expressed in all tissues at any  
38 nonzero level, and exhibits a uniform expression level across tissues<sup>72</sup>. Interacting proteins were  
39 downloaded from the mentha database in April 2019<sup>73</sup>.

40 To identify highly expressed genes, median transcripts per million (TPM) in 54 tissue  
41 types (v7 release) were downloaded from the Genotype-Tissue Expression (GTEx) project<sup>45</sup>.  
42 Tissues that contained high expression in most genes, specifically testes, were removed. Only  
43 genes that had TPM counts above zero in any of the 53 remaining tissues were used. TPM counts

1 were averaged across all tissues. Highly expressed genes were defined as the top 1000 genes  
2 expressed across all tissues.

3 To test for signals of negative selection in other functional groups, we annotated  
4 mutations by candidate GO terms according to Biological Processes: Transcription Regulation  
5 (GO Term ID: 0140110), Translation Regulation (GO Term ID: 0045182), and Chromosome  
6 Segregation (GO Term ID: 0007059).

7 **Somatic Copy Number Alteration (CNAs).** All CNAs were downloaded from the COSMIC  
8 database on June 2015<sup>15</sup>. Mitochondrial CNAs were discarded from analysis, as copy number  
9 changes are difficult to infer. Gene annotations and the locations of telomeres and centromeres  
10 were downloaded from the UCSC Genome Browser (hg19). Telomeric and centromeric regions  
11 were masked from all measurements of  $dE/dI$ . Because the selection patterns of non-focal CNAs  
12 — alterations with at least one terminus in a telomere or centromeric region — were not  
13 noticeably different from long (>100kb) focal CNAs, these two alteration classes were  
14 aggregated for analysis. Notably, we observed positive selection for both amplifications and  
15 deletions within oncogenes, and for both deletions and amplifications within Tumor Suppressors.  
16 For this reason, we did not distinguish between gains and losses, nor oncogenes and Tumor  
17 Suppressors in published analyses: any CNA that overlapped an oncogene or tumor suppressor in  
18 any region (for any fraction of the CNA) was classified as a driver. Mutational burden was  
19 defined simply as the total number of CNAs within a sample. Pan-cancer CNAs from cBioPortal  
20 (August 2018) were also analyzed, however consistent purity and ploidy estimates could not be  
21 obtained by using either ABSOLUTE<sup>69</sup> or TITAN<sup>74</sup>, so this data was not used for published  
22 analyses of CNAs.

23 **Measurements of selection on CNAs.**  $dE/dI$  was calculated using a ‘Breakpoint Frequency’  
24 metric and a ‘Fractional Overlap’ metric. For both metrics, the  $dE/dI$  of a particular gene set  $i$   
25 (e.g. driver or passenger genes) is defined by a genomic track  $T_{i,g}$ , which is one for every  
26 annotated region  $g$  of the track and zero elsewhere. Only non-centromeric and non-telomeric  
27 regions are considered in the mappable human genome  $G$ . Each CNA  $C_{g,m}$  is defined by its  
28 position on the genome  $g$  and the mutational burden  $m$  of the tumor harboring the mutation. For  
29 ‘Breakpoint Frequency’  $C_{m,i}$  is one at the position of both termini of the CNA and zero  
30 elsewhere. For ‘Fractional Overlap’  $C_{m,i}$  is  $1/L$ , where  $L$  is the length of the CNA, for every  
31 region of the genome spanned by the CNA and zero elsewhere. For a particular range of  
32 mutational burdens  $M$ ,  $dE/dI$  was defined as:

33 
$$\frac{dE}{dI}_{i,M} = \frac{\sum_m^M \sum_g^G T_{i,g} C_{m,g}}{\sum_g^G T_{i,g}}$$

34 We note that calculation is accelerated by >100x by commuting  $T_{i,g}$  with the outer summation  
35 ( $\sum_m^M$ ). Lastly, we randomly permuted the start and stop positions of each CNA, while preserving  
36 its length, to derive a set of neutral CNAs not experiencing selection. This permutation analysis  
37 finds that  $dE/dI$  for both breakpoint frequency and fractional overlap is ~1 in the absence of  
38 selection (Fig. S23).

39 **Tumor purity analysis in TCGA samples.** Tumor purity estimates from the ABSOLUTE  
40 algorithm<sup>69</sup> were downloaded from the GDC on May 2020. For all tumors and for tumors with  
41  $\leq 10$  substitutions, correlation coefficients between the total number of substitutions and tumor

1 purity were calculated. To evaluate the effects of tumor purity on patterns of selection, tumors  
2 below increasing thresholds of tumor purity were removed from the analysis, and  $dN/dS$  was  
3 calculated on tumors stratified by mutational burden bins (as described above.)

4 **Expression analysis.** Gene expression data was downloaded from the COSMIC database on  
5 September 2019. Genes used to identify different protein folding pathways were downloaded  
6 from <sup>75</sup>, genes involved in protein degradation pathways were identified from <sup>76</sup>. The median  
7 gene expression of all genes in each protein folding pathway was used. Patients were binned by  
8 the total number of substitutions (using MC3 SNP calls from TCGA) and CNAs, and the average  
9 gene expression of each bin was calculated.

10 **Cancer subtype analysis.** All tumor subtypes in TCGA and ICGC were grouped into 9 sub-  
11 categories, based on broad, predominantly anatomical features. Anatomical features (i.e. organ  
12 and systems of organs), rather than histological features or inferred cell-of-origin, were used as  
13 groupings because we believe that the fitness effects of mutations should be predominantly  
14 defined by the environment of the tumor. Nevertheless, we observed attenuated selection in both  
15 drivers and passengers in many broad histologically defined classifications (e.g.  
16 adenocarcinomas & sarcomas). For all cancer grouping analysis (broad and subtype), tumors  
17 were stratified into bins by the total number of substitutions ( $d_N + d_S$ ) on a log scale. Since tumor  
18 subtypes vary in their range of mutational burdens, (e.g. KIRC cancer subtypes only have tumors  
19 with <100 substitutions),  $dN/dS$  values in the lowest and highest mutational burden bin for each  
20 cancer-subtype are shown.

21 Specific cancer subtype categories were taken directly from the NCI Genomic Data  
22 Commons (GDC)<sup>27</sup>. Because CNAs were downloaded from COSMIC, CNA datasets were not  
23 classified with this same ontology. Table S1 details how CNA classifications were mapped on  
24 GDC categories (and sometimes more broadly-defined groups). All subtypes with >200 samples  
25 were used in our CNA subtype analyses (Fig. S15).

26 **An evolutionary model with Hill-Robertson Interference.** Somatic cells in our populations are  
27 modeled as individual cells that can stochastically divide and die in a first-order (memoryless)  
28 Gillespie Algorithm. This model was developed and described previously<sup>33</sup>. During division,  
29 cells can acquire advantageous drivers with rate  $\mu T_{\text{drivers}}$  and deleterious passengers with rate  
30  $\mu T_{\text{passengers}}$  – these values specify the mean of Poisson-distributed pseudo-random number (PRN)  
31 generators that prescribe the number of drivers and passengers conferred during division (e.g. the  
32 number of drivers per division  $n_d = \text{Poisson}[n_d = k; \lambda = \mu T_{\text{drivers}}] = \lambda^k e^{-\lambda} / k!$ ). The Distribution of  
33 Fitness Effects (DFE) conferred by each driver and each passenger are Exponentially-distributed  
34 PRNs with probability densities  $P(s_i = x; s_{\text{drivers}}) = \text{Exp}[-x/s_{\text{drivers}}]/s_{\text{drivers}}$  and  $P(s_i = x; s_{\text{passengers}}) = -$   
35  $\text{Exp}[-x/s_{\text{passengers}}]/s_{\text{passengers}}$  respectively. Simulations with other exponential-family DFEs do not  
36 qualitatively differ from these exponential distributions<sup>28</sup>. The aggregate absolute cellular fitness  
37 is  $f = \prod_i^{\text{all mutations}} (1 + s_i)$  in our Multiplicative Epistasis model and  $\Delta f = s_i / (1 + \nu f)$  with  $\nu$   
38  $= 1$  in our Diminishing>Returns Epistasis Model where  $\Delta f$  is the change in cellular fitness with  
39 each mutation<sup>77</sup>. The rate of cell birth is inversely proportional to cellular fitness, while the rate  
40 of cell death  $D(N; N^0) = \text{Log}[1 + \frac{N}{(e-1)N^0}]$  increases with the population size of the tumor  $N$ .  
41 With these birth and death processes, mean population size abides by a Gompertzian growth law  
42 in the absence of additional mutations, which is scaled by the mean cellular fitness  $E[N(\langle f \rangle)] =$   
43  $\text{Log}[1 + \langle f \rangle / N^0]$  (derived from Master Equation<sup>28</sup>). While, programmatically, mutations

1 exclusively affect the birth rate and the constraints on growth exclusively affect the death rate,  
2 we previously demonstrated that birth and death rates are generally nearly-balanced such that  
3 dynamics are not affected by this design choice.

4 Because somatic cells do not recombine during cell division, dominance coefficients  
5 were not explicitly modeled. Thus in diploid cancers, our selection coefficients estimate the  
6 mean heterozygous effect of drivers and passenger (i.e.  $h_s$ ). Similarly, Loss of Heterozygosity  
7 (LOH) events (gene losses, gene conversions, mitotic recombination, etc) are not explicitly  
8 modeled either; however, these events can be viewed as additional mutations that may be either  
9 adaptive drivers or deleterious passengers in the model. As sequencing data improves, we  
10 believe that it will be informative to explicitly model dominance coefficients, tumor ploidy, and  
11 LOH events.

12 Simulations progressed until tumor extinction ( $N = 0$  cells), malignant transformation ( $N$   
13  $= 10^6$  cells), or until approximately 100 years had passed (18,500 generations). Only fixed  
14 mutations (present in the Most Recent Common Ancestor) within clinically-detectable growths  
15 were analyzed in our ABC pipeline. The behavior of this model has been described  
16 previously<sup>28,33</sup> and the most relevant assumptions of this model and their effects on the  
17 conclusions of this study are described in Table S2.

18 Cells in our populations are fully described by their accrued mutations, and birth and  
19 death times. Birth and death events were modeled using an implementation of the Next  
20 Reaction<sup>78</sup>, a Gillespie Algorithm that orders events using a Heap Queue. Generation time in our  
21 model was defined as the inverse of the mean birth rate of the population:  $1 / \langle B(d, p) \rangle$ . While all  
22 mutation events occurred during cell division, if mutations were to occur per unit of time (rather  
23 than per generation), rapidly growing tumors would acquire drivers at a slightly slower rate as  
24 generation times decline over time. This effect, however, is negligible compared to the variation  
25 in waiting times conferred by the variation in mutation rates (division times merely double, while  
26 mutation rates vary by 100,000-fold).

27 This simple evolutionary model is defined by five parameters  $\mu T_{\text{drivers}}$ ,  $\mu T_{\text{passengers}}$ ,  $S_{\text{drivers}}$ ,  
28  $S_{\text{passengers}}$ , and  $N^0$ . The target size of drivers is defined as the approximate number of  
29 nonsynonymous mutations in the Bailey Driver Screen  $T_{\text{drivers}} = (\# \text{ of driver genes}) \cdot (\text{mean driver}$   
30  $\text{length}) \cdot (\text{fraction of SNVs that are nonsynonymous}) = 300 \text{ genes} \cdot 1298 \text{ loci/gene} \cdot 0.737$   
31  $\text{nonsynonymous loci} / \text{loci} = 286,886 \text{ nonsynonymous loci}$ . The target size of passengers was  
32 simply the remaining loci in the protein coding genome,  $T_{\text{passengers}} = 20,451,136 \text{ nonsynonymous}$   
33  $\text{loci}$ . The mutation rate was constant throughout each tumor simulation and randomly-sampled  
34 from a uniform distribution in log-space that ranged from  $10^{-12}$  to  $10^{-7}$  mutations $\cdot$ loci $\cdot$   
35  $1 \cdot \text{generation}^{-1}$ . While tumors were initiated from this broad range, malignancies ( $N > 10^6$  cells)  
36 were almost always restricted to mutation rates between  $10^{-10}$  and  $10^{-8}$  (Fig. S20), as tumors with  
37 mutation rates drawn below this range almost never progressed to cancer within 100 years and  
38 tumors with mutation rates drawn above this range went extinct through natural selection.

39 The likelihood that tumors progress to cancer in the presence of deleterious passengers  
40 depends heavily on the initial population size  $N^0$  of the tumor. This dependence was studied  
41 previously<sup>33</sup>, where it was demonstrated that reasonable evolutionary simulations (those that  
42 progress to cancer  $>10\%$  of the time, but less than  $90\%$  of the time) are restricted to a four-  
43 dimensional manifold  $N^*$  within the five-dimensional phase space of parameters. For this reason,

1  $N^0 = N^*(s_{\text{drivers}}, s_{\text{passengers}}, \mu T_{\text{drivers}}, \mu T_{\text{passengers}})$  was determined by the other four parameters. To  
2 first-order, this manifold is  $T_{\text{passengers}} s_{\text{passengers}} / (T_{\text{drivers}} s_{\text{drivers}}^2)$ , however a more precise estimate  
3 (Eq. S8 of <sup>33</sup>) incorporating more precise estimates of Muller's Ratchet and the effects of  
4 hitchhiking on both driver and passenger accumulation rates, which does not exist in closed form  
5 was used. Additionally, at very low values of  $s_{\text{drivers}}$ , progression to cancer is limited by time, not  
6 by the accumulation of deleterious passengers. Hence, we assigned  $N^0$  such that:

$$7 \quad N^0 = \text{Max}_{N^0} [P_{\text{cancer}}(N^0/N^*) = 0.5, \overline{t_{\text{cancer}}}(N^0/N^*) = 18,500 \text{ generations}]$$

8 Here,  $P_{\text{cancer}}$  and  $t_{\text{cancer}}$  – the likelihood and waiting-time to cancer – are defined by equations S8  
9 and S12 respectively in <sup>33</sup>.  $N^0$  was determined from these equations using Brent's Method.  
10 Supplementary Figure 17 depicts the values of  $N^0$ , which ranged from 1 to 100 for all  
11 simulations.

12 In tumors that progress to malignancy ( $N = 10^6$ ), only fixed nonsynonymous mutations  
13 (present in all simulated cells) were recorded. We also recorded (i) the fitness effect of these  
14 mutations, (ii) the mean population fitness, (iii) the number of generations until malignancy, and  
15 (iv) the mutation rate. These two values were used to generate the number of synonymous  
16 drivers and passengers, where  $P(d_s = k) = \text{Poisson}[k; \lambda = \mu T_{\text{drivers/passengers}} / r t_{\text{MRCA}}]$  defines the  
17 number of synonymous drivers/passengers conferred,  $t_{\text{MRCA}}$  represents the number of division  
18 until the Most Recent Common Ancestor arose in the simulation,  $r = 2.795$  represents the ratio of  
19 nonsynonymous to synonymous loci within the genome, weighted by the genome-wide  
20 trinucleotide somatic mutation rate, and the Poisson PRN generator was defined above. In  
21 simulations where synonymous drivers could arise, a fraction of the recorded nonsynonymous  
22 mutations (ranging from 0 – 20%) were simply re-labeled as synonymous drivers (as opposed to  
23 nonsynonymous drivers). This was done, again, by Poisson-sampling in proportion to the desired  
24 fraction for each cancer simulation.

25 20 x 20 combinations of  $s_{\text{drivers}}$  and  $s_{\text{passengers}}$  parameters were simulated (Fig. S16 & S17).  
26 Simulations were repeated until 10,000 cancers at each parameter combination were obtained or  
27 until 10 million tumor populations were simulated. While we attempted to initiate tumors at a  
28 population size where the probability of progression to cancer was 50%, some parameter  
29 combinations still did not yield 10,000 cancers after 10 million attempts (i.e.  $P_{\text{cancer}} < 0.1\%$ ).  
30 These combinations were predominately at low values of  $s_{\text{drivers}}$ , which were far from the MLE  
31 estimate of  $s_{\text{drivers}}$  and represent unrealistic evolutionary scenarios: drivers cannot be weakly  
32 beneficial, relegated to only 300 genes, and still overcome deleterious passengers within 100  
33 years. These simulations are annotated as "Progression Impossible." Simulation parameter  
34 sweeps were performed for both the Multiplicative and Diminishing Returns Epistasis models.  
35 Twenty fractions of synonymous drivers were also generated (ranging from 0% to 20%). These  
36 fractions were generated by simply re-labeling the driver mutations which conferred fitness  
37 (generated during the simulation) as synonymous, instead of nonsynonymous.

38 **Summary statistics of simulated and observed tumors.** For both simulated and observed data,  
39 we summarized  $dN/dS$  rates versus mutational burden for drivers and for passengers by decade-  
40 sized bins: (0, 10], (10, 100], (100, 1,000]. Mutational burden for simulations was defined as the  
41 total number of substitutions ( $d_N + d_S$ ) – exactly as it was defined for observed data. For  
42 simulated data,  $dN/dS = d_N/(d_S \cdot r)$ . Like observed data,  $dN/dS$  rates attenuated towards 1 for both  
43 drivers and passengers for all values of  $s_{\text{drivers}}$  and  $s_{\text{passengers}}$ .

1 Mutational Burdens (MB) for simulated and observed data were summarized with the  
2 parameters of a Negative Binomial distribution, where  $P(\text{MB} = k; n, p) = \binom{k+n-1}{n-1} p^n (1-p)^k$ . This distribution has been used previously to summarize the mutational burdens of human  
3 tumors<sup>79</sup> and exactly defines the expected number of mutations at transformation in a Multi-  
4 Stage Model of Tumorigenesis<sup>30</sup> when  $n$  drivers are needed for transformation and the  
5 probability that any mutation be a driver is  $1-p$ <sup>80</sup>. Both  $n$  and  $p$  were used to summarize MB.  
6 These quantities were determined by Maximum Likelihood optimization of the probability mass  
7 function above over the support of mutational burdens of  $[1, 1,000]$  substitutions. The Han-  
8 Powell quasi-Newton Least-squares method was used for optimization.

10 Age-dependent Cancer Incidence rates (CI) were summarized with the parameters of a  
11 Gamma distribution, where  $P(\text{CI} \leq t; k, \theta) = \frac{1}{\Gamma(k)} \gamma\left(k, \frac{t}{\theta}\right)$ . Here,  $\gamma(s, x) = \int_0^x t^{s-1} e^{-t} dt$  is  
12 the lower incomplete gamma function and  $\Gamma(k) = \gamma(k, \infty)$  is the regular gamma function. Similar  
13 to our summarization of mutational burdens, this distribution is a generalization of the exact  
14 waiting time to transformation expected from a Multi-Stage Model of Tumorigenesis when  
15 tumors arise at a uniform rate over time, require  $k$  drivers for transformation, and wait an average  
16 time of  $\theta$  between drivers<sup>80</sup>. This Cumulative Distribution Function was fit to observed  
17 incidence rates for all patients above 20 years of age using the least squares numerical  
18 optimization defined above (All cancer sites combined, both sexes, all races, 2012 – 2016<sup>81</sup>).  
19 Patients under 20 years of age were excluded because cancers in these patients generally arise  
20 from germline predispositions to cancer, which are (i) not directly modeled by our simulations,  
21 (ii) not detected as somatic mutations, and (iii) result in age-incidence curves that do not agree  
22 with a Gamma distribution<sup>30</sup>. Because all cancer simulations are initiated at  $t = 0$  (instead of  
23 uniformly in time, as is presumed in the Multi-Stage Model), the simulated data was fit using the  
24 probability density function of this distribution (instantaneous derivative) using Maximum  
25 Likelihood and the optimization algorithm described above. The cumulative distribution, then,  
26 represents the expected age-incidence cancer incidence rate when simulations begin at  
27 uniformly-distributed moments in time and, thus, was used to generate Figure 3D. Only the  
28 shape parameter  $k$  was used in ABC (and  $\theta$  was ignored), as this parameter only specifies the  
29 dimensionality of time (simulation time was measured in cellular generations, not years) and all  
30 values of  $\theta$  in our simulations are equivalent under a Gauge transformation. Additionally, we do  
31 not expect the exact times of incidence to be particularly informative as the time of  
32 transformation is generally somewhat earlier than the time of detection.

33 **Use of Approximate Bayesian Criterion (ABC) for model selection and parameter**  
34 **inference.** Like many Bayesian analyses, the main steps of an ABC analysis scheme are: (1)  
35 formulate a model, (2) fit the model to data (parameter estimation), and (3) improve the model  
36 by checking its fit (posterior-predictive checks) and (4) comparing this model to other models  
37<sup>82,83</sup>.

38 The nine summary statistics described above were used to compare simulations to  
39 observed data. Agreement was summarized with a Log-Euclidian distance, as all summary  
40 statistics resided on the domain  $[0, \infty)$  and log-transformation of the summary statistics  
41 minimized heteroscedasticity of the simulated data relative to a square-root or no transformation.  
42 Variance of the summary statistics was not normalized. ABC was performed using the 'abc' R  
43 package<sup>82</sup>.



1           The rejection method (Feedforward Neural Net) and tolerance (0.5) were chosen based  
2 on their capacity to minimize prediction error of the simulated data using Leave-one-out Cross  
3 Validation (CV, Fig. S18A). 10,000 instances of the neural network, which was restricted to a  
4 single layer, were initiated and the median prediction of these networks were used. These  
5 parameters were used for both model comparison and parameter inference. The posterior model  
6 probability (postpr) was used to compare the two epistatic models (Diminishing Returns versus  
7 Multiplicative). The likelihood of the data under the Diminishing Returns model (14%) was less  
8 than the likelihood under the Multiplicative Epistasis Model (86%). For parameter inferencing,  
9 the  $s_{\text{drivers}}$  and  $s_{\text{passengers}}$  prior values were log-transformed.

10           For the synonymous driver model, the base model (without synonymous drivers) was  
11 simply the lowest quantity of synonymous drivers (0%) in the parameter sweep of synonymous  
12 driver quantities (Fig. S18B). The posterior probability mass of this value 0.043 was used as the  
13 one-sided  $p$ -value for the null hypothesis that these two models are equally predictive. Although  
14 the synonymous driver model agreed with the observed data slightly-better,  $s_{\text{drivers}}$  and  $s_{\text{passengers}}$   
15 parameters could not be inferred from the data because the potential for synonymous drivers  
16 destroys the utility of a  $dN/dS$  statistics, which is predicated on the notion that synonymous  
17 mutations are neutral. Virtually any value of  $dN/dS$  is attainable when the right combinations of  
18 selective pressures on nonsynonymous and synonymous are paired (Fig. S18C).

19

1 **Supplementary Figures**

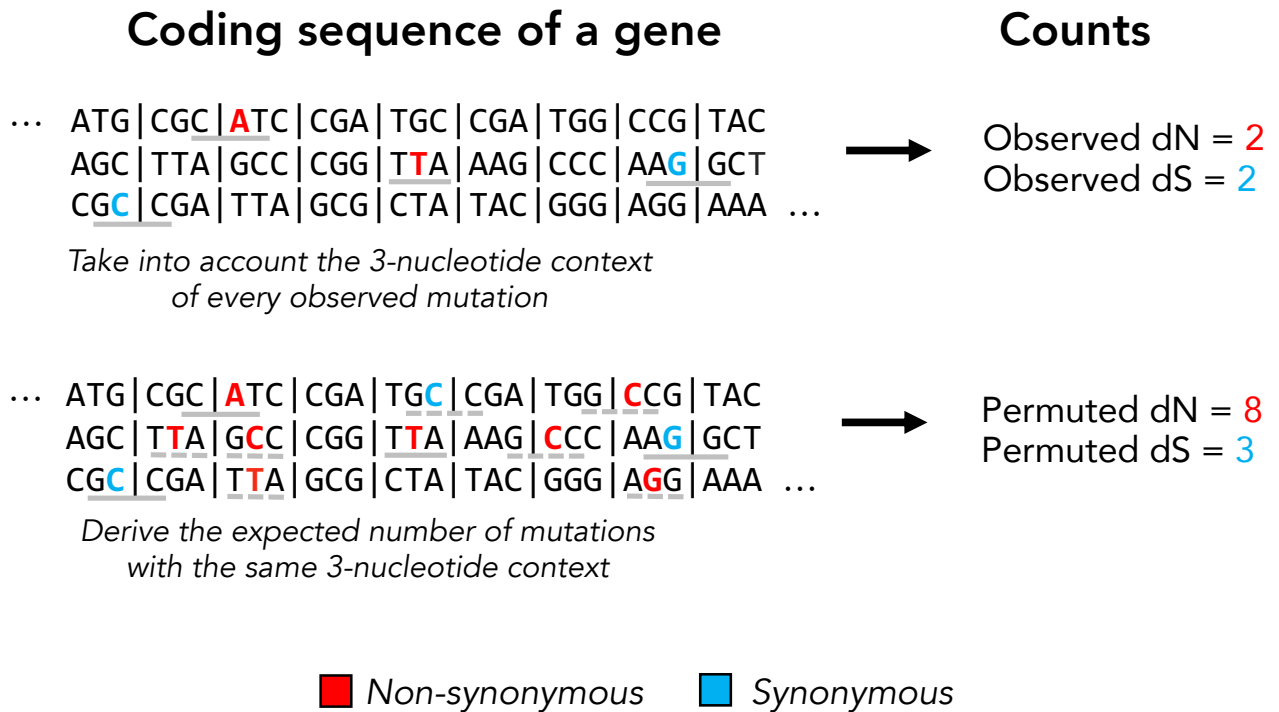

2

3 **Supplemental Figure 1. Schematic of our permuted dN and dS calculation.**

4 Permuted synonymous and nonsynonymous counts are used to account for mutational  
 5 biases in dN/dS calculations. Observed mutations and their 3-nucleotide context is  
 6 shown in a solid gray bar. Permuted mutations with the same 3-nucleotide context are  
 7 shown in dashed gray lines. Note that permutations do not preserve the codon position  
 8 of a mutation and can alter protein coding effect (nonsynonymous vs. synonymous).

9

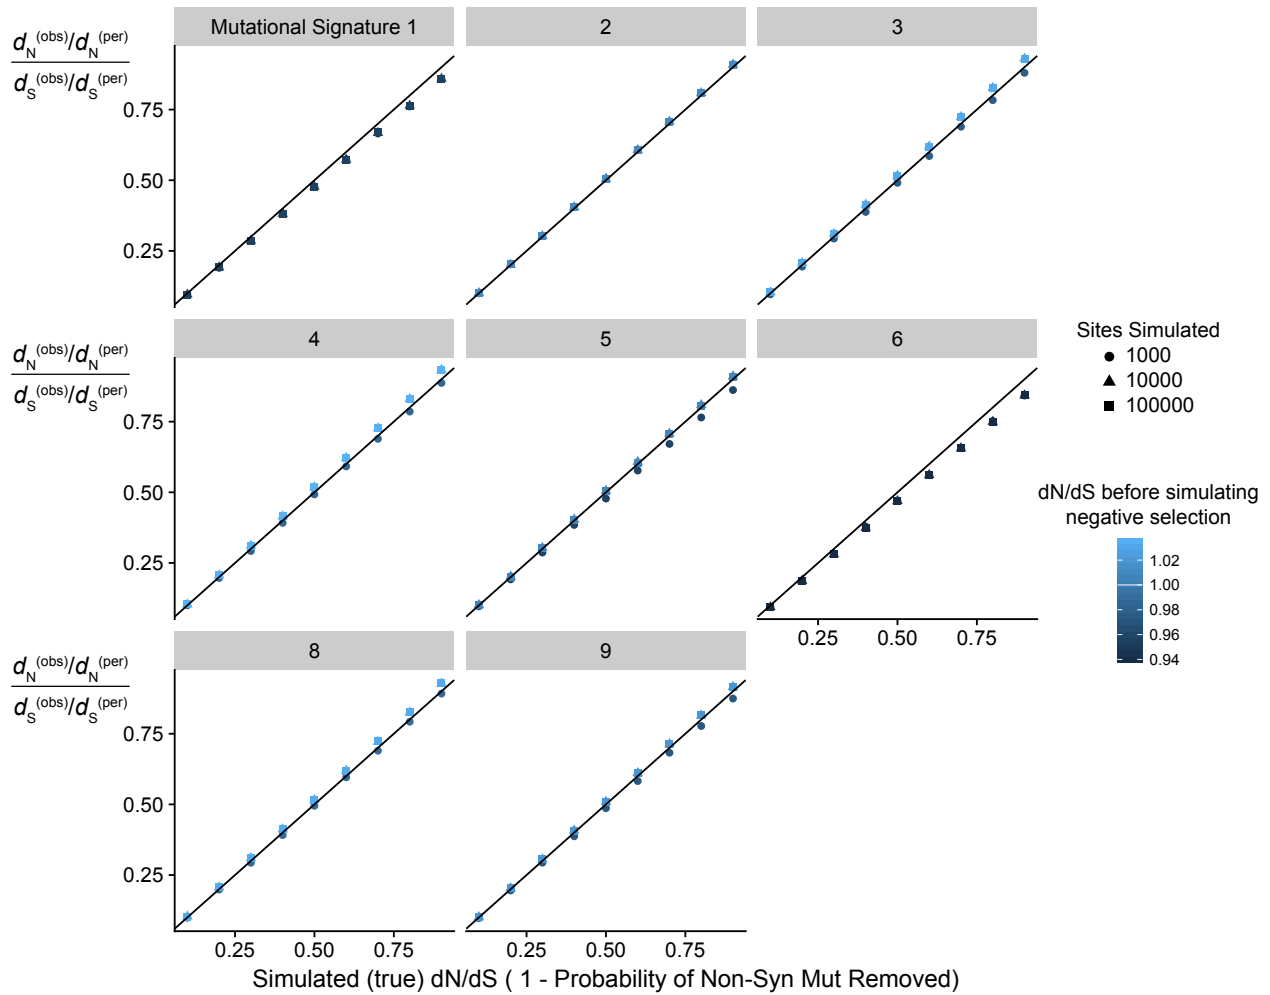

1

2 **Supplemental Figure 2. Permutation-based null model of mutagenesis corrects**  
 3 **for mutational biases in dN/dS calculations.** Simulations ( $N = 100$ ) of negative  
 4 selection under extreme mutational bias scenarios where all mutations are generated  
 5 from a single Mutational Signature (e.g. APOBEC or smoking, COSMIC Signatures 1-9,  
 6 grey titles). Bias-corrected dN/dS values calculated from these simulations are  
 7 compared to simulated levels of negative selection. Colors denote bias-corrected dN/dS  
 8 before negative selection was simulated, which is expected to be neutral ( $\sim 1$ ). Negative  
 9 selection is simulated as the probability of randomly removing nonsynonymous  
 10 mutations, (e.g. a simulated 'true' dN/dS of 0.1 defines simulations where each  
 11 nonsynonymous mutation had a 90% probability of removal). Shapes correspond to  
 12 different numbers of sites simulated. Black line identifies perfect correspondence  
 13 between bias-correct dN/dS and simulated (true) dN/dS.

14

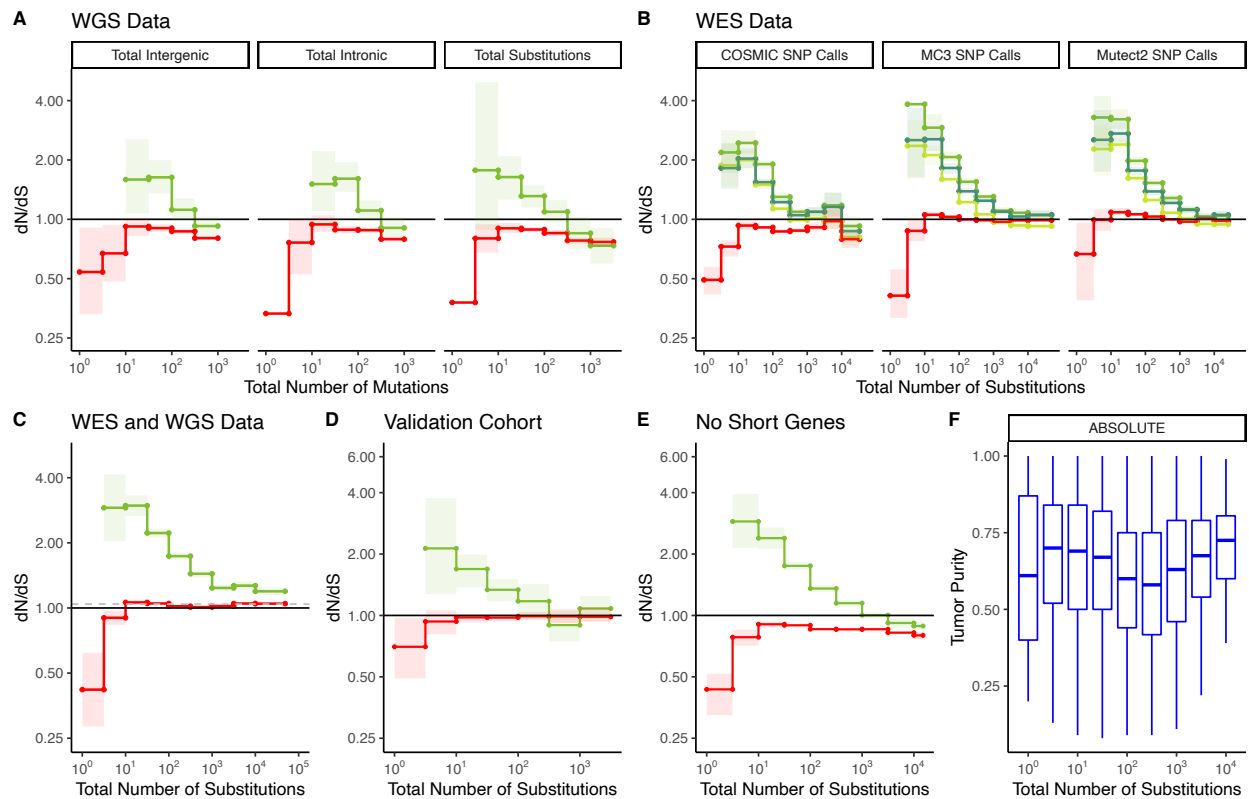

1  
2 **Supplemental Figure 3. Patterns of attenuated selection persist across mutation**  
3 **burden metrics, sequencing platforms, mutation calling algorithms, data**  
4 **repositories, and choice of driver gene set. (A-C)** dN/dS calculations within  
5 passenger and driver gene sets for various burden metrics, sequencing platforms,  
6 mutation calling algorithm, choice of driver gene set, and data repository. The solid  
7 black line ( $dN/dS = 1$ ) annotates expected dN/dS under neutrality in all panels. Error  
8 bars are 95% confidence intervals determined by bootstrap sampling. **(A)** Tumors in  
9 ICGC stratified by either the total number of intergenic mutations, intronic mutations or  
10 substitutions. **(B)** dN/dS calculations for various pan-cancer driver gene sets stratified  
11 by the total number of substitutions. Shown are tumors within TCGA called by different  
12 mutation callers (Mutect2 vs consensus, MC3 SNP calls), and SNV calls from COSMIC.  
13 **(C)** dN/dS calculations within passenger and driver gene sets within tumors in ICGC  
14 and TCGA stratified by the total number of substitutions. Instead of using our  
15 nonparametric null model, we calculate dN/dS using dNdScv<sup>1</sup> as a null model of  
16 mutagenesis (with default parameters and unrestricted quantities of coding mutations  
17 per gene). Grey dashed line represents global dN/dS values of all tumors without  
18 stratifying by mutational burden. **(D)** Validation of dN/dS calculations within passenger  
19 and driver gene sets in primary untreated tumors, distinct from ICGC and TCGA,  
20 stratified by the total number of substitutions. **(E)** dN/dS of tumors in TCGA and ICGC  
21 stratified by the total number of substitutions after removing short genes, i.e. genes with  
22 fewer than 10 permutations. **(F)**. ABSOLUTE purity estimates in TCGA from the GDC in  
23 tumors stratified by the total number of substitutions.

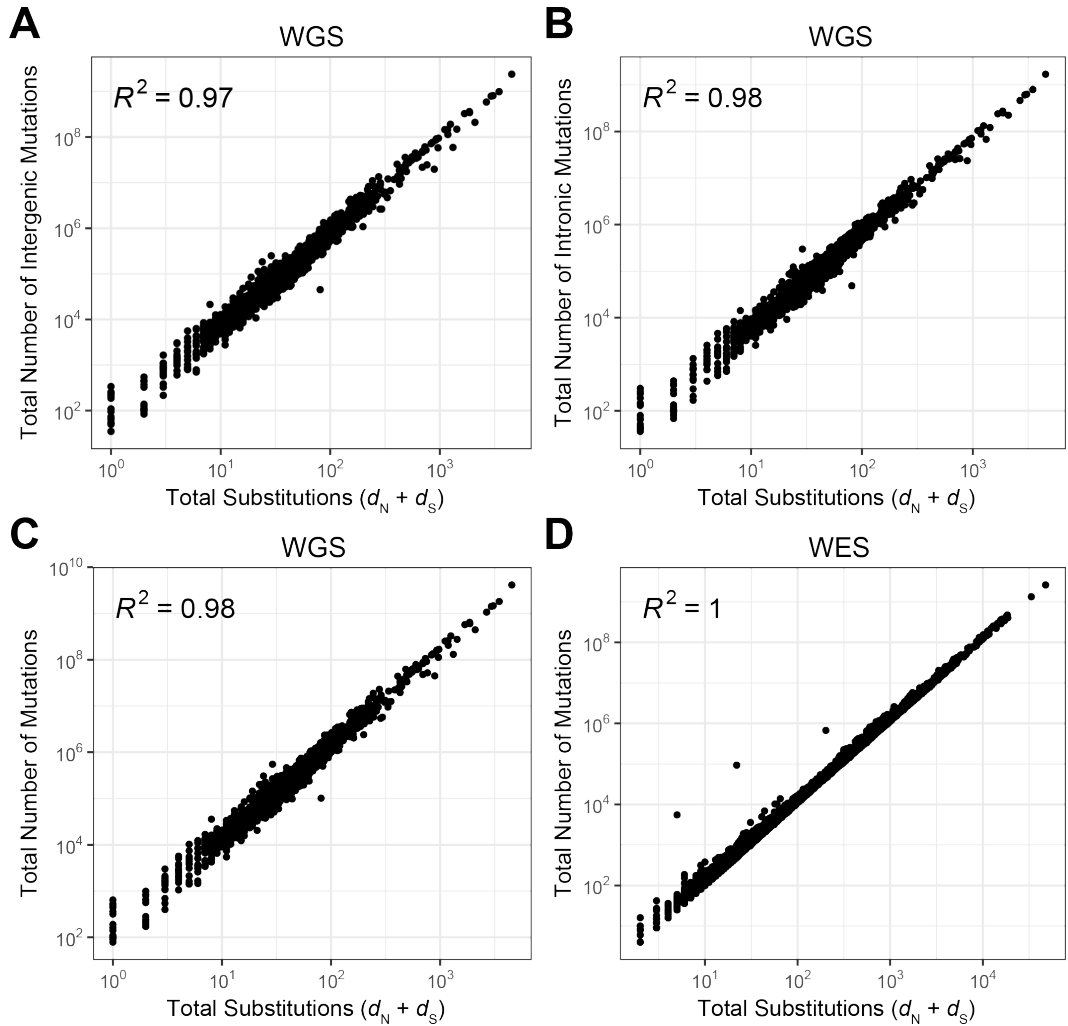

1

2 **Supplemental Figure 4. Mutation burden metrics, used as a proxy for the tumor**  
 3 **mutation rate, are correlated across datasets. (A)** Correlation between the total  
 4 number of substitutions and the total number of intergenic or **(B)** intronic mutations  
 5 within tumors in TCGA (WES). **(C)** Correlation between the total number of mutations  
 6 (TMB) and total number of substitutions for tumors in ICGC (WGS) and **(D)** and TCGA  
 7 (WES). Because all mutational burden metric are highly correlated, general patterns of  
 8 selection are unaffected by choice of mutational burden metric.

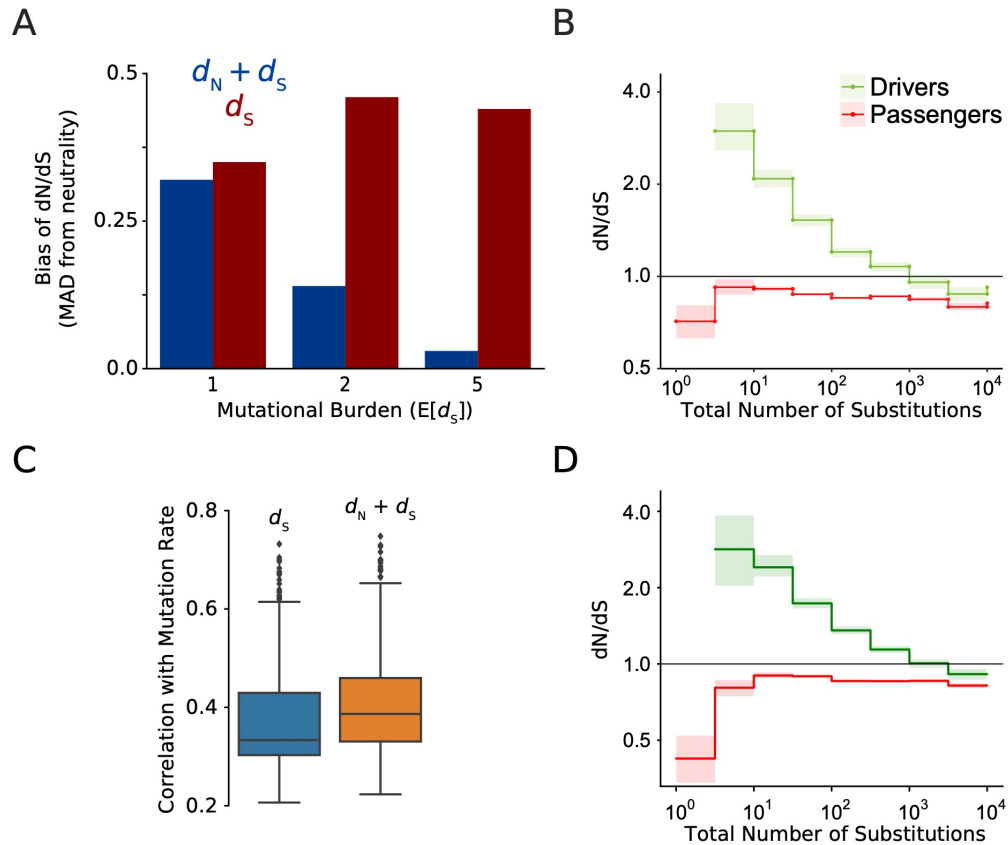

1  
2 **Supplemental Figure 5. Stratification of dN/dS by mutational burden (defined as**  
3  **$d_N + d_S$ ) does not bias dN/dS values and correlates well with mutation rate in**  
4 **simulations. (A)** Theoretical bias of dN/dS (Mean Absolute Deviation from neutrality) of  
5 mutational burden metrics that contribute to dN/dS calculations.  $d_N + d_S$  (i.e. Total  
6 Substitutions) imparts less bias than  $d_S$  (i.e. Total Synonymous Substitutions). Bias  
7 determined by analytical model of dN/dS with ratios of Poisson-sampled mutation tallies  
8 (Methods). Bias rapidly decreases with mutational burden for  $d_N + d_S$ . Total  
9 Substitutions ( $d_N + d_S$ ) exhibit less bias than Total Synonymous Substitutions ( $d_S$ ). **(B)**  
10 Patterns of selection persist when independent mutation counts (completely orthogonal)  
11 were used for estimating selection (dN/dS) and mutational burden ( $d_N + d_S$ ).  
12 Independent accounts were achieved by randomly partitioning mutations into two halves  
13 and using one half to calculate dN/dS and the half to calculate Total Number of  
14 Substitutions separately. Tumors were from TCGA. dN/dS and Error Bars (95%  
15 Confidence Interval) are same as in Figure 2. Solid black line of 1 denotes dN/dS  
16 expected under neutrality. **(C)** Pearson correlation of both mutational burden measures  
17 with mutation rate in computational model of tumor evolution (Methods). The mutational  
18 burdens of ~4 million simulated cancers were compared to their programmed mutation  
19 rate.  $d_N + d_S$  correlated well with mutation rates across a range of evolutionary  
20 parameters and was more highly correlated with mutation rate than  $d_S$  alone. **(D)** Same  
21 as in Figure 2A of the main text, except tumors with no synonymous mutations and  
22 tumors with no nonsynonymous mutations are included. dN/dS values at low Mutational  
23 Burdens are not appreciably altered by these filters.  
24

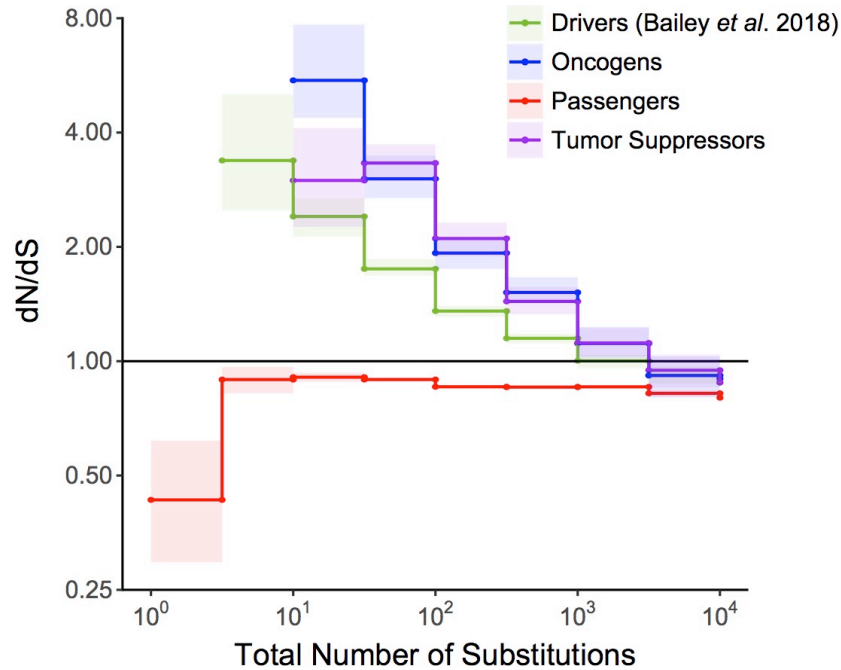

1  
2  
3  
4  
5  
6  
7  
8  
9

**Supplementary Figure 6. Attenuation of selection with increasing mutational burden in both Oncogenes and Tumor Suppressors.** dN/dS of passenger and driver gene sets<sup>16</sup> within tumors in TCGA stratified by the total number of substitutions present in the tumor ( $d_N + d_S$ ). Tumor suppressors (purple), oncogenes (blue) and pan-cancer driver (green) gene sets are shown. Solid black shows dN/dS values of 1, expected under neutrality. Error bars are 95% confidence intervals determined by bootstrap sampling.

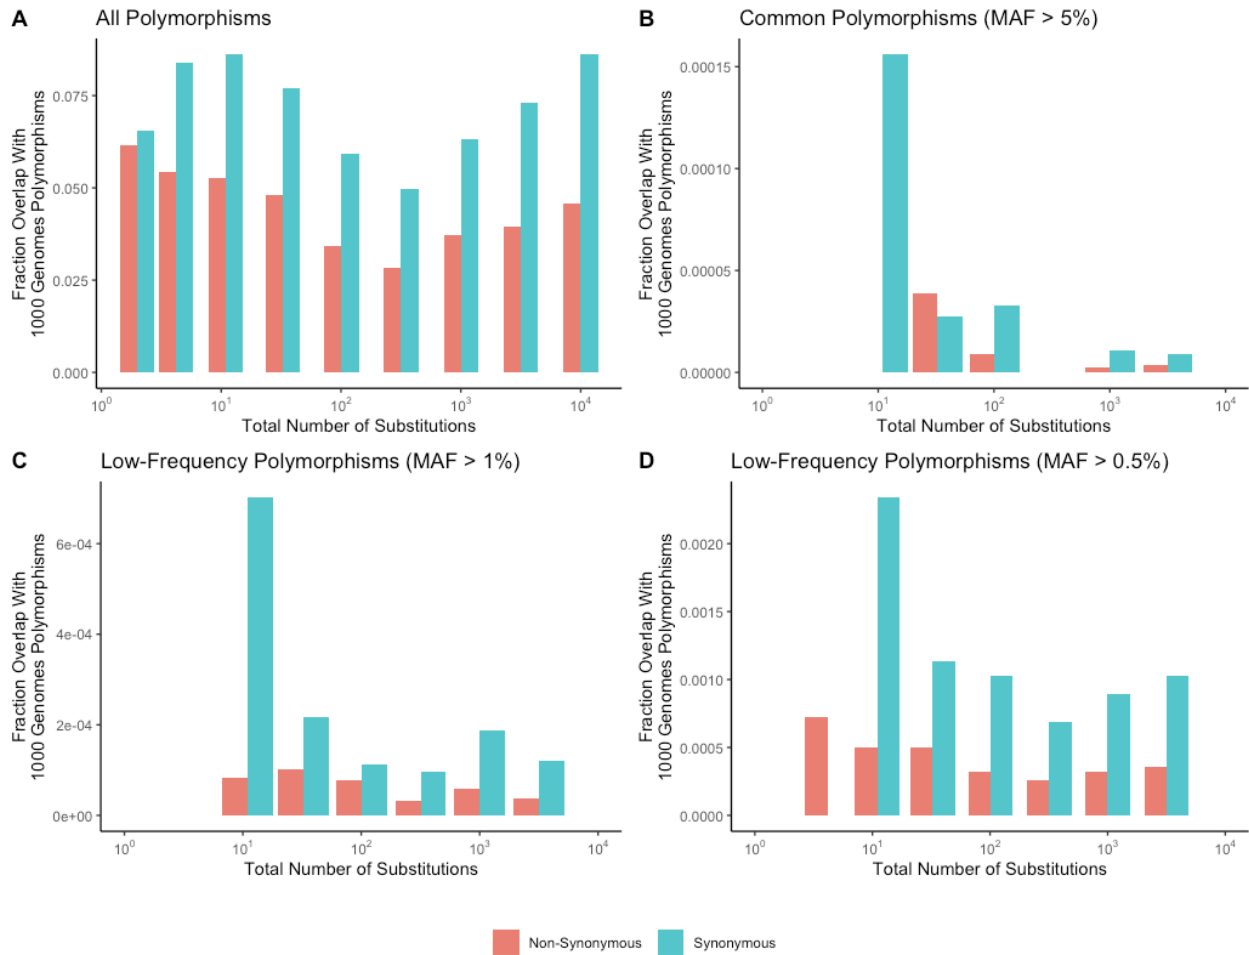

1  
2

3 **Supplemental Figure 7. No common germline polymorphisms observed in low**  
 4 **mutation rate cancers. (A)** Fraction of mutations that overlap all germline  
 5 polymorphisms in the 1000 Genomes Project within tumors stratified by the total  
 6 number of substitutions. **(B-D)** Fraction of mutations that overlap only common (MAF >  
 7 0.05, 0.01 or 0.005) polymorphisms in the 1000 Genomes Project within tumors  
 8 stratified by the total number of substitutions. WGS and WES datasets are shown.  
 9 Colors denote mutations that are synonymous (blue) or nonsynonymous (red). Strong  
 10 negative germline selection is expected only within common polymorphisms. No  
 11 mutations within low mutational burden cancers ( $\leq 10$  substitutions) overlap common  
 12 polymorphic sites (when MAF > 0.1). Note that there are no synonymous mutations at  
 13 MAF > 0.05 within low mutational burden cancers that could lower dN/dS rates through  
 14 germline contamination.

15



1

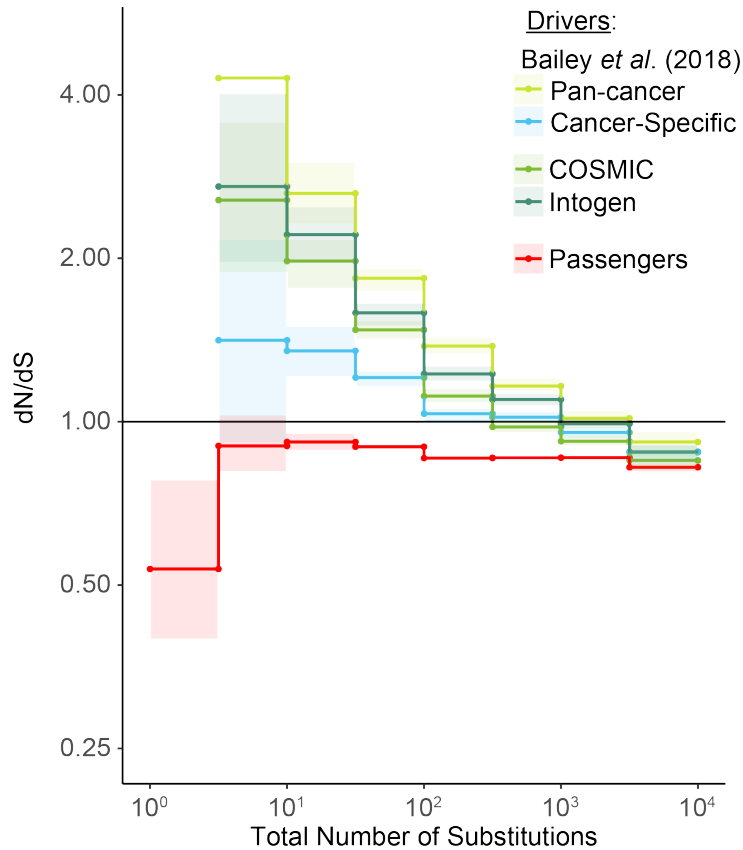

2

3

4 **Supplemental Figure 8. Weaker signals of positive selection within cancer-**  
5 **specific drivers.** dN/dS values of passenger and different driver gene sets within  
6 tumors in TCGA stratified by the total number of substitutions present in the tumor ( $d_N +$   
7  $d_S$ ). Pan-cancer driver (lime) and cancer-specific (blue) driver gene sets identified by  
8 Bailey *et al.* 2018<sup>16</sup> are shown. Pan-cancer driver genes identified in this study also  
9 exhibited stronger signatures of positive selection than driver genes identified by  
10 COSMIC<sup>84</sup> (light green) and Intogen<sup>17</sup> (forest green). Hence, pan-cancer drivers from  
11 Bailey *et al.* 2018 were used throughout this study. Cancer-specific gene sets are  
12 defined as the top 100 recurrently mutated genes within the particular cancer type, and  
13 used separately for each of the 33 cancer types in TCGA. Solid black shows dN/dS  
14 values of 1, expected under neutrality. Error bars are 95% confidence intervals  
15 determined by bootstrap sampling.

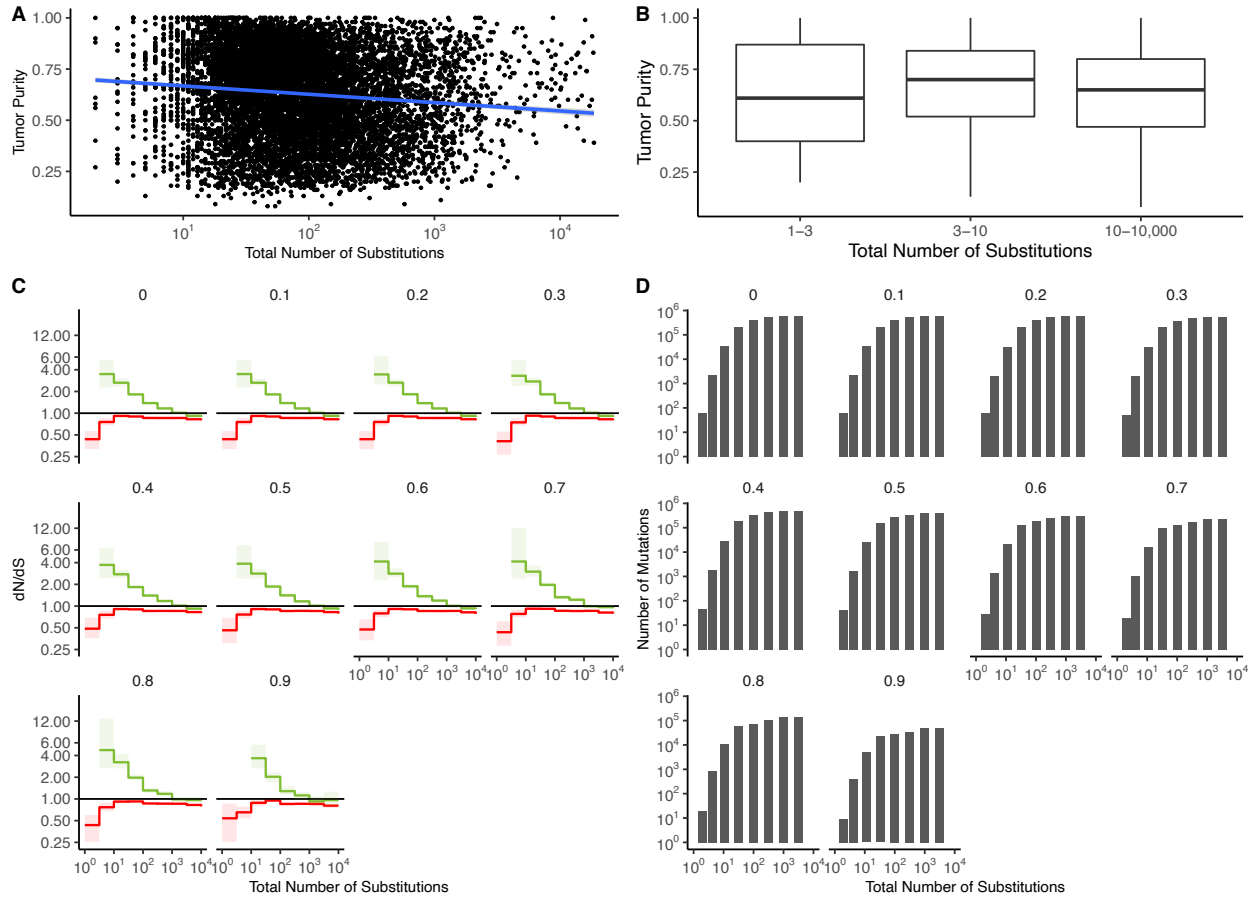

1  
2  
3  
4  
5  
6  
7  
8  
9  
10  
11  
12  
13  
14  
15  
16  
17

**Supplemental Figure 9. Patterns of attenuated selection persist across tumor purity thresholds. (A).** Correlation between tumor purity (calculated by GDC using the ABSOLUTE<sup>69</sup> algorithm, Methods) and the total number of substitutions in all TCGA samples ( $r = -0.0008$ ,  $R^2 = 7 \times 10^{-7}$ ). Blue line denotes a linear regression fit and grey colors denote the 95% confidence intervals for the fit of this linear model. **(B).** Boxplot of tumor purity in TCGA samples stratified into low mutation rate bins (1-3 and 3-10 substitutions) and high mutation rate bins (10-10,000 substitutions). **(C).** dN/dS in driver (green) and passenger (red) gene sets of tumors in TCGA stratified by the total number of substitutions after removing tumors below various purity thresholds. Values at the top denote the threshold of tumors removed from the analysis. (e.g. 0.3 shows dN/dS of tumors with a purity  $\geq 0.3$ .) **(D)** Number of mutations in each bin within **(C)** after removing tumors at increasing purity thresholds. Error bars are 95% confidence intervals determined by bootstrap sampling.

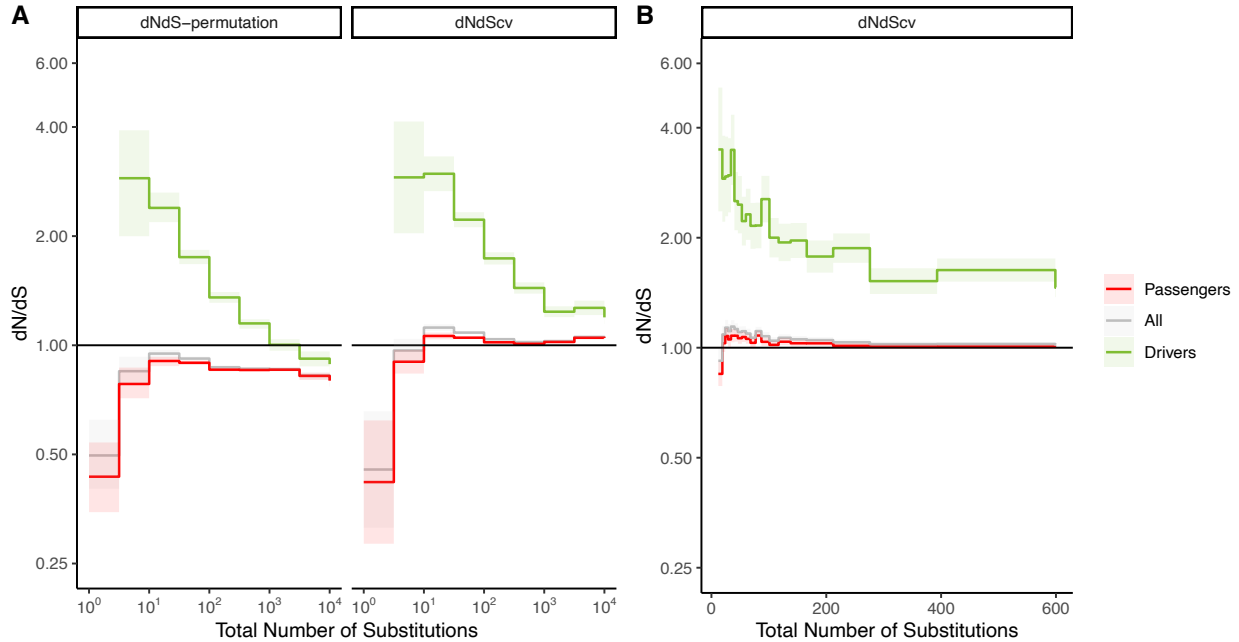

1  
2  
3 **Supplemental Figure 10. Comparison of dN/dS to results in Martincorena *et al.***  
4 **(2017) for tumors stratified by mutational burden. (A).** dN/dS in driver (green),  
5 passenger (red) and all gene sets (grey) of tumors in TCGA stratified by the total  
6 number of substitutions using 9 bins of equal width (log-scale TMB), as depicted in  
7 Figure 2. Left panel uses our non-parametric null model of mutagenesis to calculate  
8 dN/dS, while the right panel uses dNdScv (from Martincorena *et al.* 2017) as a null  
9 model of mutagenesis. Error bars are 95% confidence intervals determined by bootstrap  
10 sampling. **(B).** dN/dS of driver (green), passenger (red) and all gene sets (grey) of  
11 tumors in TCGA stratified by the total number of substitutions using 20 bins of equal  
12 sample sizes, as was done in Figure 5 of Martincorena *et al.* 2017. The binning scheme  
13 and linear axes compress results at low TMB. To replicate Martincorena *et al.* 2017,  
14 three tumor types were also excluded in this analysis: UVM, CHOL, and DLBC. DNdScv  
15 was used as a null model of mutagenesis. dN/dS for driver and passenger genes sets  
16 was not calculated in Figure 5 of Martincorena *et al.* (2017). Error bars are 95%  
17 confidence intervals derived from dNdScv.  
18

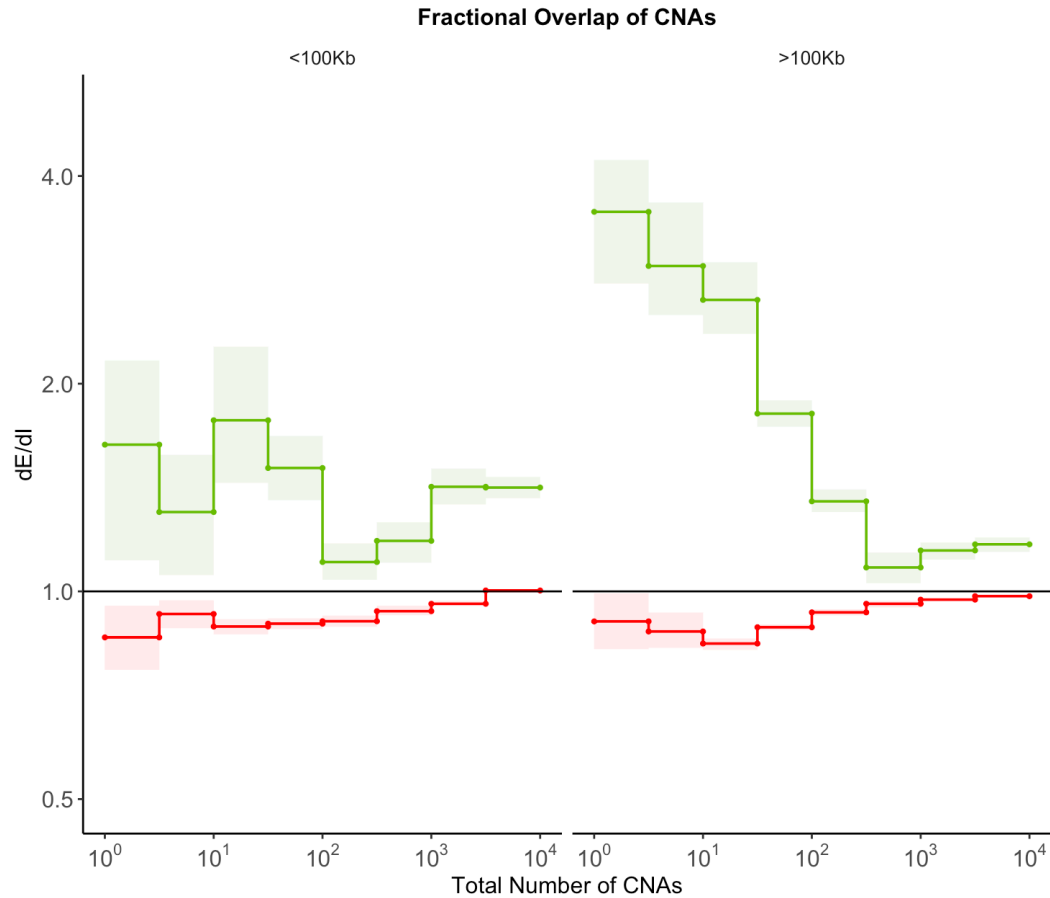

1

2 **Supplemental Figure 11. Fractional overlap of CNAs within exomic regions (dE)**  
 3 **relative to intergenic regions (dI) exhibits similar patterns of selection as**  
 4 **Fractional Overlap.** Calculations of fractional overlap<sup>20</sup> of exomic regions (dE) to  
 5 intergenic (dI) regions within passenger and GISTIC<sup>68</sup> driver gene sets in tumors  
 6 stratified by the total number of CNAs present. dE/dI is shown separately for CNAs  
 7 greater than 100Kb in length (right) and smaller than 100Kb in length (left). Solid black  
 8 line of 1 denotes values expected under neutrality. Error bars are 95% confidence  
 9 intervals determined by bootstrap sampling.

10

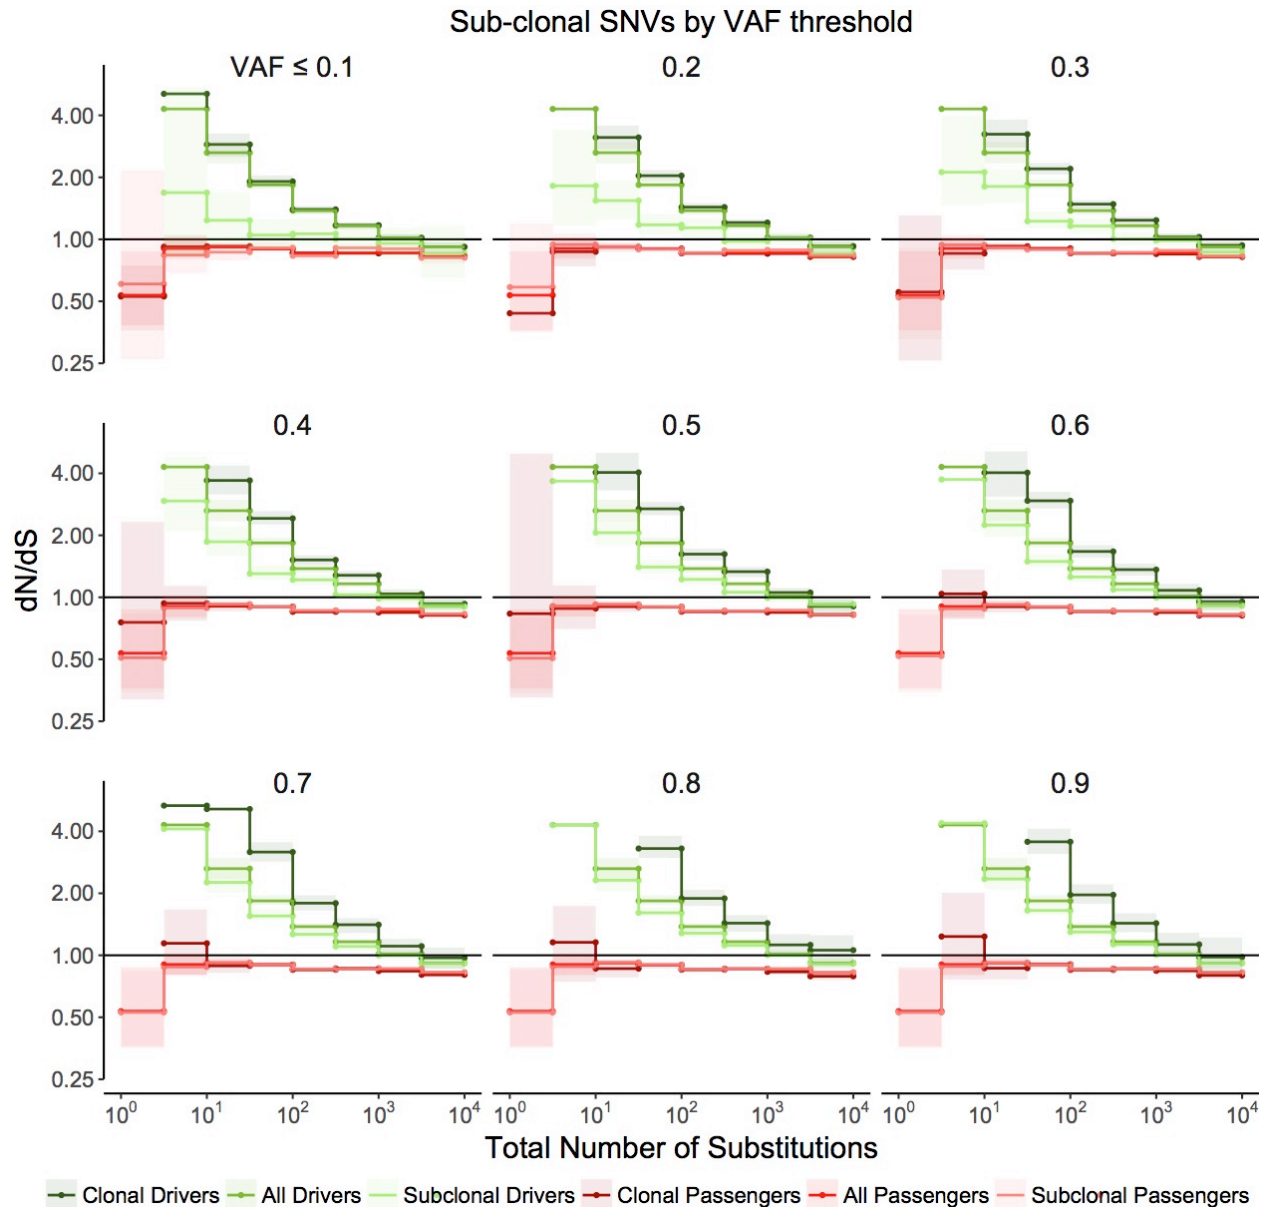

1  
2

3 **Supplemental Figure 12. Signal of negative selection in subclonal mutations are**  
4 **robust to VAF threshold.** dN/dS calculations within clonal and subclonal passenger  
5 and driver gene sets within tumors in TCGA stratified by the total number of  
6 substitutions. Title of each graph corresponds to increasing VAF threshold value used to  
7 define 'subclonal' (e.g. mutations with a VAF > 0.2 are clonal; mutations with a VAF <  
8 0.2 are subclonal). Darker colors denote clonal passengers and drivers, while lighter  
9 colors denote subclonal passengers and drivers. Solid line of 1 is shown of dN/dS  
10 values expected under neutrality. Error bars are 95% confidence intervals determined  
11 by bootstrap sampling.

12

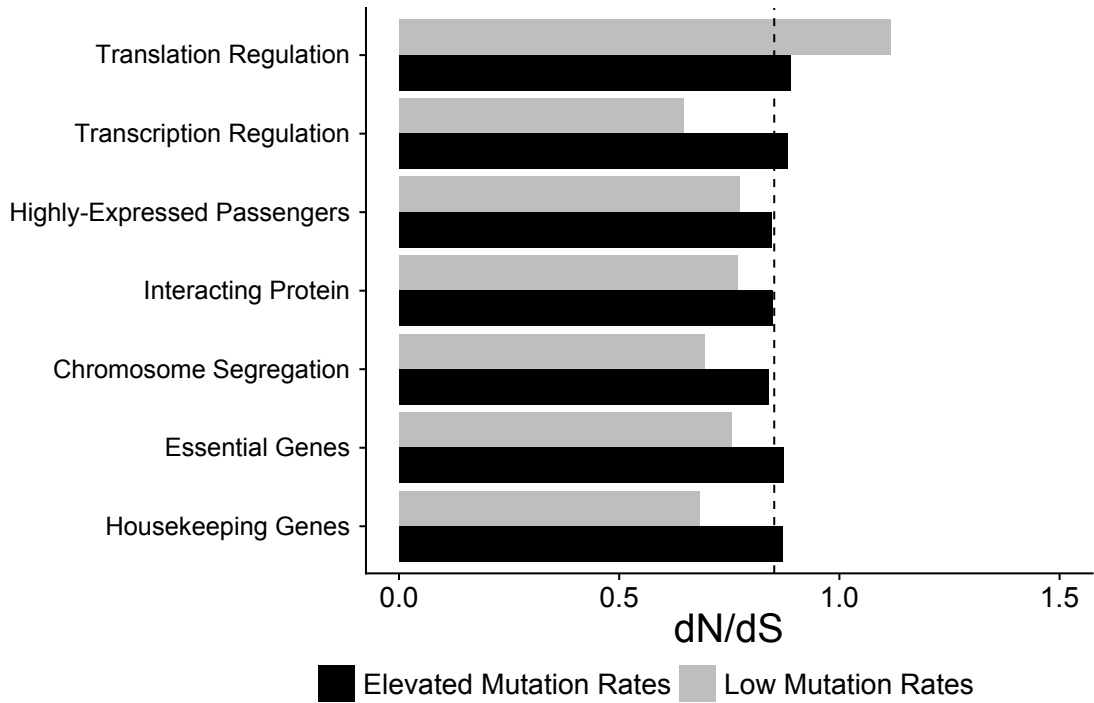

1  
2  
3  
4  
5  
6  
7  
8  
9  
10  
11

**Supplemental Figure 13. Attenuation of negative selection within different functional gene sets.** dN/dS of passengers within different functional gene sets in low and high mutational burden tumors ( $d_N + d_S < 10$  for low, grey;  $d_N + d_S > 10$  for high, black). Both TCGA and ICGC genomic data were used. Dotted line denotes genome-wide dN/dS of passengers for all mutation rates. Error bars are 95% confidence intervals determined by bootstrap sampling. Patterns of negative selection are not specific to any particular functional category (e.g. Essential or Housekeeping genes).

1

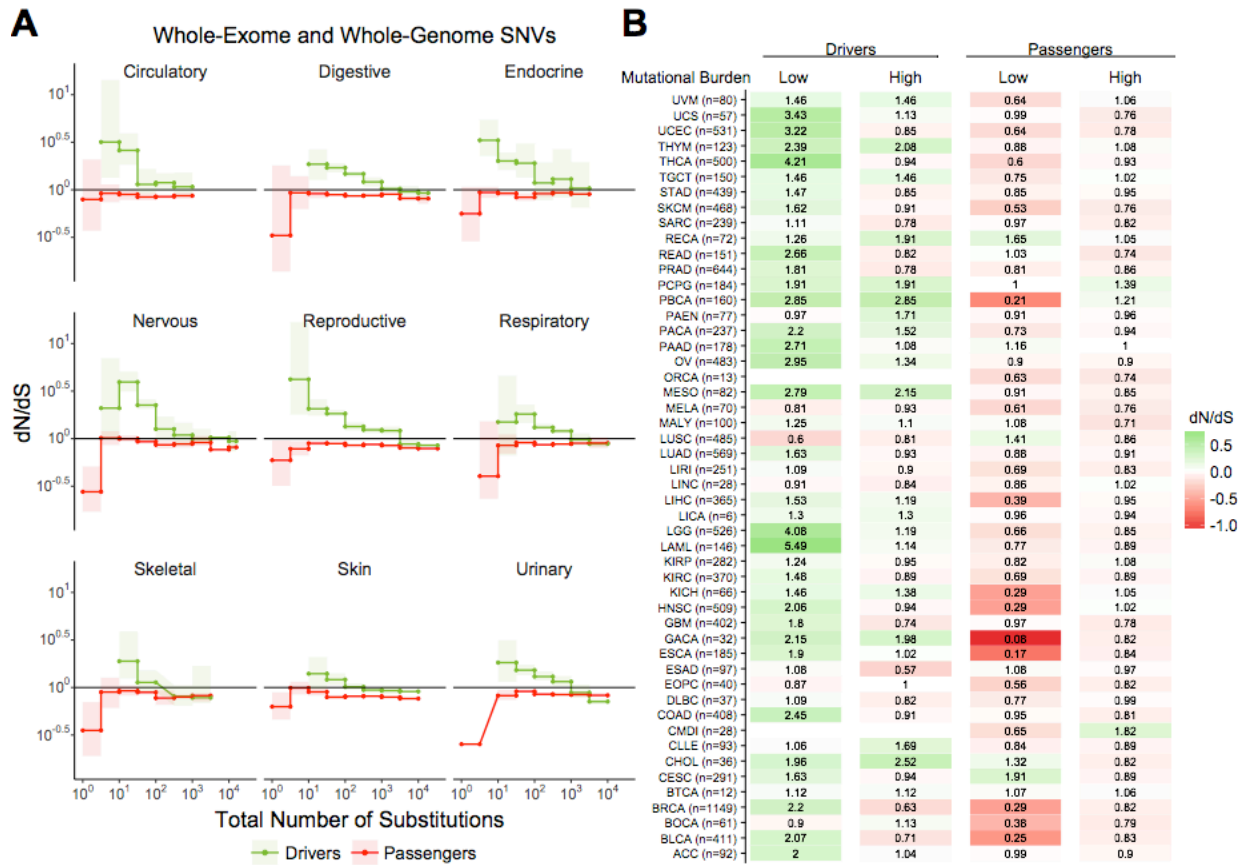

2

3

4

5 **Supplemental Figure 14. Attenuation of selection in SNVs persists across cancer**

6 **subtypes and broad cancer group categories. (A)** dN/dS in passenger and driver

7 gene sets within tumors stratified by the total number of substitutions in broad tumor

8 subcategories. Error bars are 95% confidence intervals determined by bootstrap

9 sampling. **(B)** Log-scale heatmap of dN/dS values in passenger and driver gene sets of

10 tumors stratified by the total number of substitutions within all 50 cancer subtypes in

11 ICGC and TCGA. dN/dS of the lowest and highest mutational burden bin for each

12 cancer subtype are shown.

13

14

15

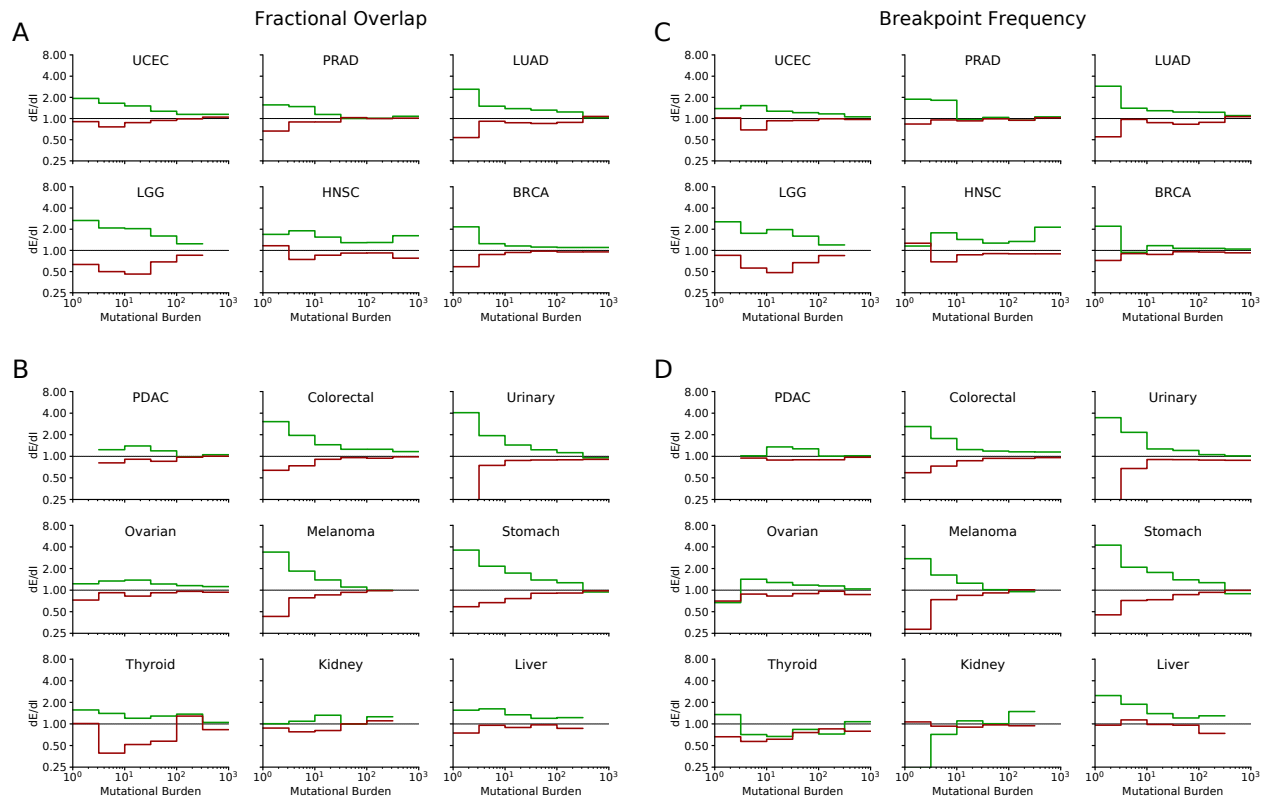

1  
2  
3  
4  
5  
6  
7  
8  
9  
10  
11  
12  
13  
14  
15  
16  
17  
18  
19

**Supplemental Figure 15. Attenuation of selection in CNAs is robust to cancer subtypes and broad cancer group categories.** (A) Normalized fractional overlap ( $dE/dI$ ) of driver (green) and passenger (red) Copy Number Alterations (CNAs) with the human exome for the six most commonly sequenced cancer subtypes (presented in Fig. 2).  $dE/dI > 1$  suggests positive selection, while  $dE/dI < 1$  suggests negative selection. Tumors are stratified by Mutational Burden (Total CNAs). (B) Same as in (A) for cancer subtypes with  $>200$  genotyped samples that were not presented above (nine subtypes). (C-D)  $dE/dI$  of normalized breakpoint frequency stratified by Mutational Burden and segregated by cancer subtype. Subtype groupings are same as (A-B). In general, both  $dE/dI$  measures exhibit positive selection on drivers that attenuates with mutational burden as well as negative selection on passengers that also attenuates with mutational burden across tumor subtypes. However, several exceptions are evident – especially for less-sequenced subtypes (bottom row of B & D).



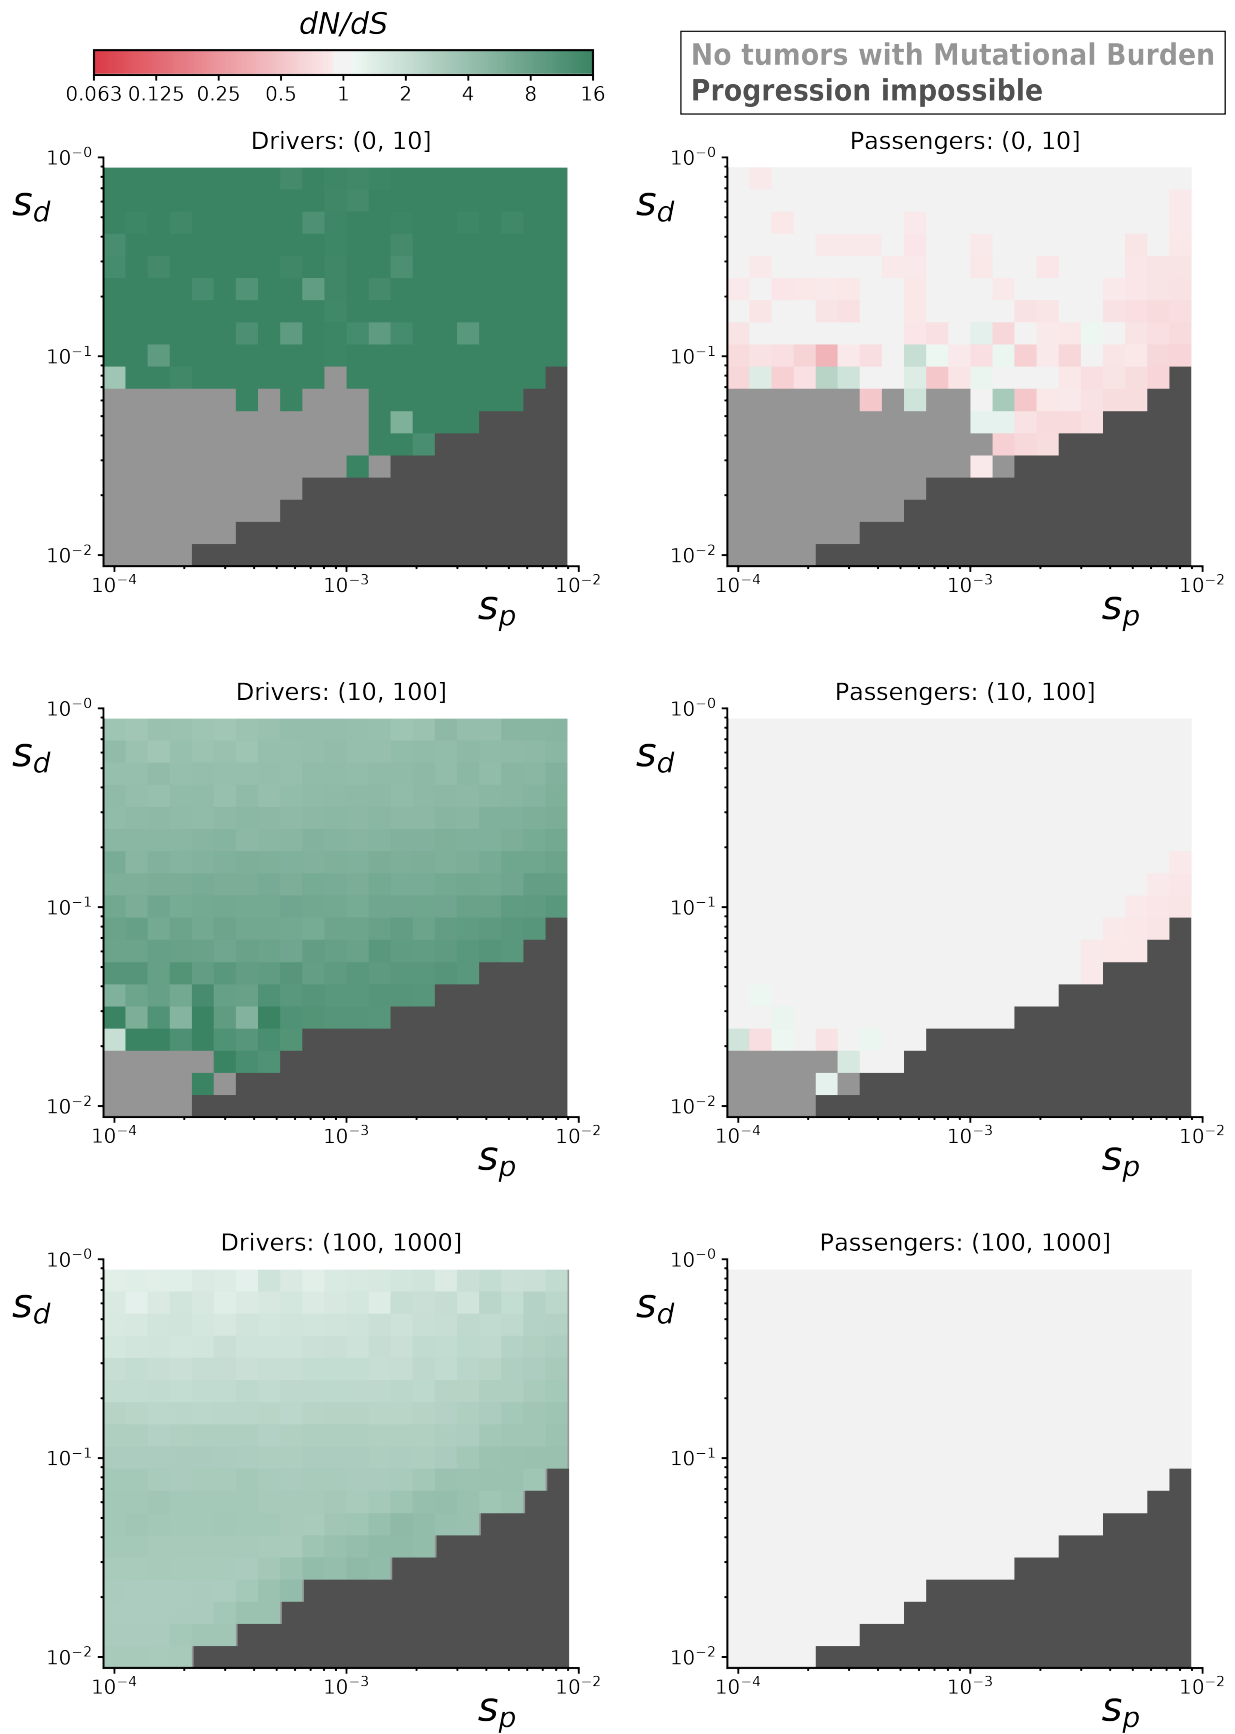

1 **Supplemental Figure 16. dN/dS rates of drivers and passengers in simulated**  
2 **cancers with various fitness coefficients.** 10,000 simulated tumors were generated  
3 for various combinations of mean driver fitness benefits ( $s_{\text{drivers}}$ ) and mean passenger  
4 fitness costs ( $s_{\text{passengers}}$ , Methods). For some parameter combinations, the combined  
5 fitness cost of passengers overwhelmed the fitness benefit of drivers and prevented  
6 cancer progression within 100 years (dark grey). dN/dS values of simulated mutations  
7 were calculated for drivers (left) and passengers (right) at various mutational burden  
8 (Total number of nonsynonymous and synonymous mutations). Top row is a mutational  
9 burden of 1 – 10 ; middle row is 11 – 100, and bottom row is 100 – 1,000. Some  
10 parameter combinations did not produce any tumors with low mutational burdens (light  
11 grey). Across all parameters, positive selection on drivers and negative selection against  
12 passengers attenuates with mutational burden. Passengers exhibit minimal negative  
13 selection in general, despite a collective burden that often prevented tumor progression,  
14 because of strong Hill-Robertson interference in asexual populations.  
15

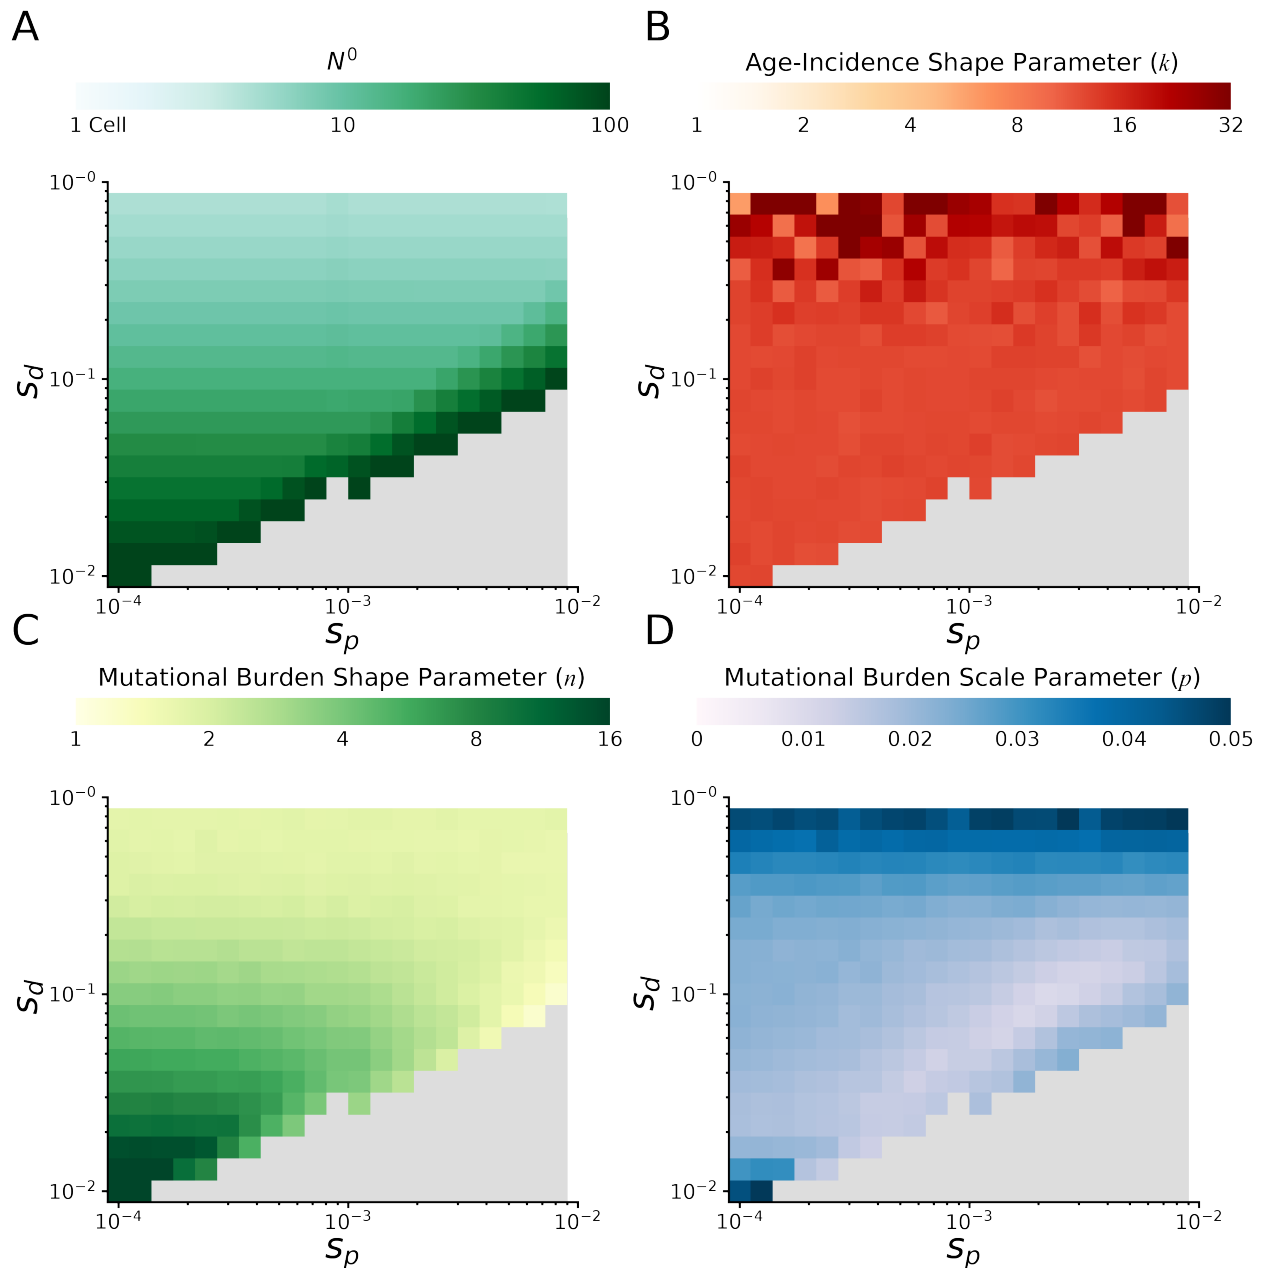

1  
2

3 **Supplementary Figure 17. Probability of cancer by age and mutational burdens in**  
 4 **simulated cancers at various fitness coefficients.** Clinical summary statistics of  
 5 simulated tumors at various combinations of mean driver fitness benefits ( $s_{\text{drivers}}$ ) and  
 6 mean passenger fitness costs ( $s_p$ , Methods). **(A)** Initial population size  $N^0$  of simulated  
 7 tumors. Initial population size approximates the equilibrium population size of a tumor  
 8 following an initiating driver. Large population sizes are necessary for tumor progression  
 9 when passenger deleteriousness is large compared to driver advantageousness –  
 10 otherwise natural selection cannot drive carcinogenesis. Eventually, tumor progression  
 11 is not possible for any reasonable initial population size (grey area). **(B)** MLE of Gamma  
 12 distribution shape parameters describing the cancer age-incidence rates of simulated

1 tumors. A Gamma distribution of age-incidence is expected from the Armitage-Doll  
2 multistage model of tumorigenesis and describes human age-incidence rates well  
3 (Methods)<sup>30</sup>. Larger values correspond to a steeper increase in rate with age; human  
4 patient rates are ~5 pan-cancer. Scale parameter of the parametric fit is not informative  
5 because of a Gauge freedom in the model. **(C)** MLE of shape and **(D)** scale parameters  
6 of Negative Binomial distributions describing the mutational burdens of simulated  
7 tumors. Smaller values of shape parameter correspond to broader distributions of  
8 mutational burden; human tumors exhibit a value of ~2 pan-cancer. Smaller values of  
9 scale parameter correspond to a larger mean mutational burden; human tumors exhibit  
10 a value of ~1/50 (i.e. 50 passengers per rate-limiting driver).

11

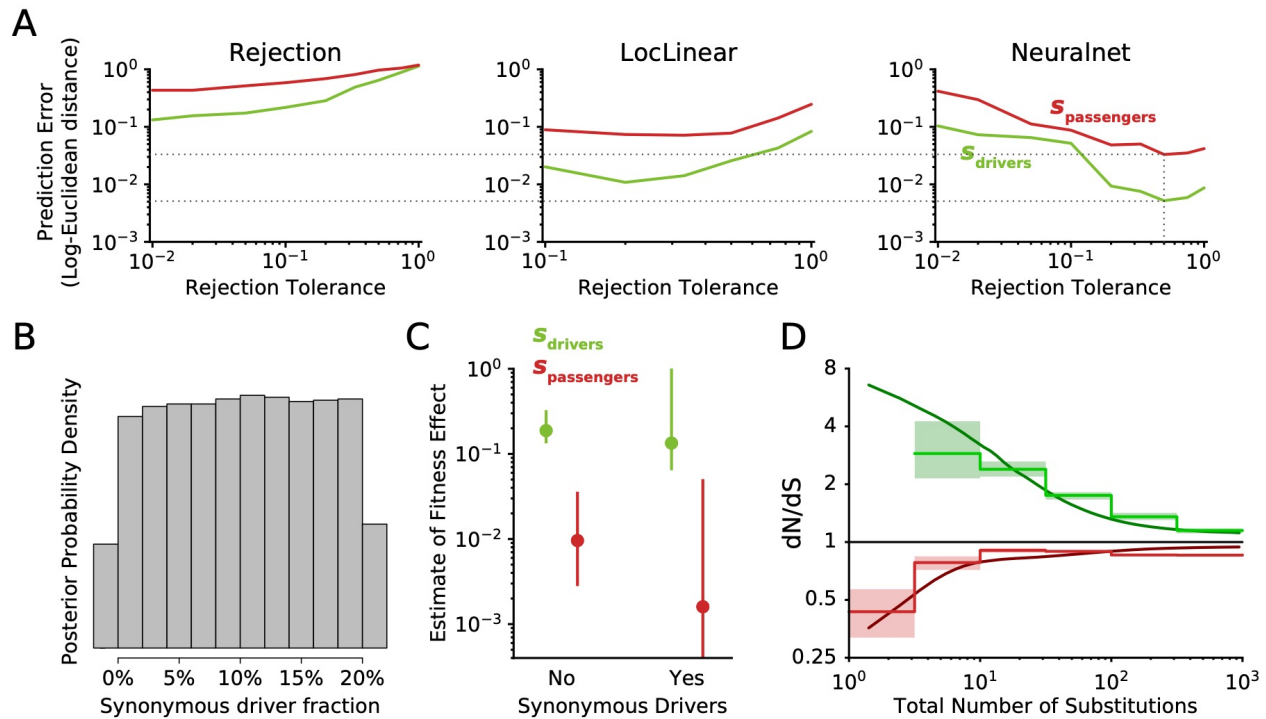

1  
2 **Supplementary Figure 18. Implementation and use of ABC for model selection**  
3 **and parameter estimation. (A)** Leave-one-out Cross Validation (CV) on the simulated  
4 data was used to select an optimal Rejection Tolerance and optimal rejection method.  
5 Observed data can be compared to simulated data using model rejection alone (left), or  
6 by comparing observed data to a (middle) local-linear regression or (right) Feed-  
7 Forward Neural Network single-layer model trained on the simulated data. In general,  
8 unsupervised training of a neural network on simulated data will often improve  
9 prediction accuracy by denoising stochasticity in the simulations (via kernel prediction.)  
10 A neural network with a rejection tolerance of 0.5 minimized prediction error of both  
11 driver and passenger fitness effects (illustrated by dotted lines) and was used to infer  
12 selection coefficients. This Cross Validation optimization procedure for ABC is  
13 advised<sup>82</sup>. **(B)** Posterior probability of models of tumor evolution incorporating  
14 synonymous drivers. The prior distribution of synonymous driver fractions (uniform from  
15 0% to 20%) is nearly-identical to this posterior distribution. This suggests that nearly all  
16 models incorporating synonymous drivers can explained observed dN/dS patterns with  
17 the right combination of fitness parameters. **(C)** Posterior distribution of fitness effect of  
18 driver fitness benefits ( $S_{drivers}$ ) and passenger fitness costs ( $S_{passengers}$ ) after synonymous  
19 drivers are incorporated. MLE (circles) and 95% Confidence Intervals (lines) are  
20 reported. Similar to (B), incorporation of synonymous drivers undermines the ability of  
21 ABC to accurately infer fitness coefficients. **(D)** Comparison of dN/dS rates from one  
22 million simulated tumors (using ML estimates of  $S_{drivers}$  and  $S_{passengers}$ , dark smooth lines)  
23 to observed dN/dS patterns (light, stepped lines). Both observed and simulated dN/dS  
24 rates of passengers rapidly approach 1 as mutation burden increases. This is  
25 presumably because, for populations near mutation-selection balance, the size of the  
26 fittest class of cells declines exponentially with the mutation rate (discussed in <sup>33</sup>).

27

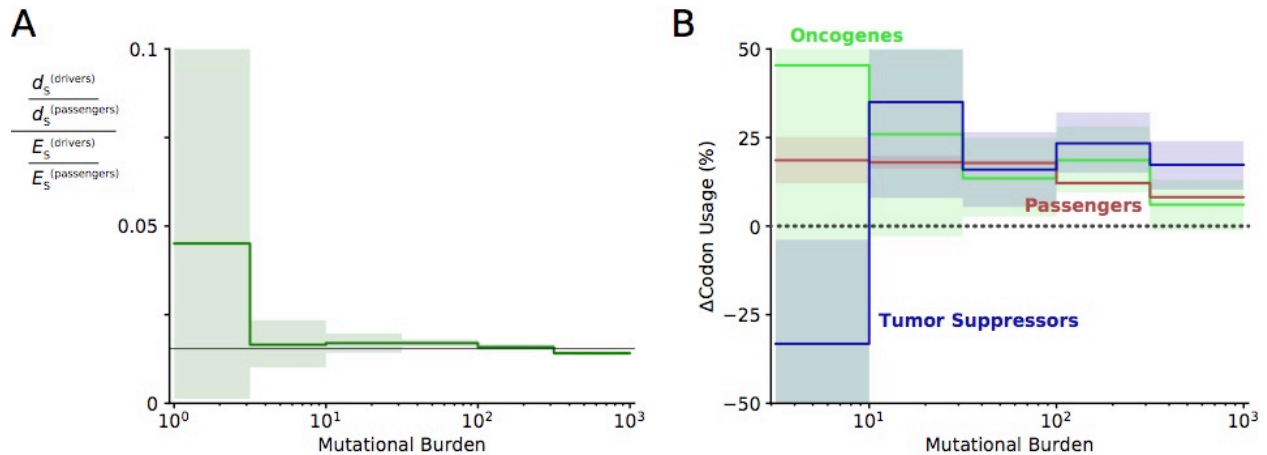

1

2 **Supplementary Figure 19. Evidence of positive selection on synonymous**  
 3 **mutations within driver genes at low mutational burdens. (A)** The quantity of  
 4 synonymous mutations within driver genes was compared to the quantity of  
 5 synonymous mutations within passenger genes and both were normalized by their  
 6 expected frequencies using dNdScv. Black line denotes the genome-wide ratio of  
 7 synonymous drivers to synonymous passengers (~2%, i.e. driver genes are ~2% of the  
 8 human coding genome). At low mutational burdens, a non-significant increase in the  
 9 quantity of synonymous drivers is observed, suggestive of positive selection for these  
 10 mutations. **(B)** The change in codon usage imparted by all synonymous mutations was  
 11 calculated for oncogenes, tumor suppressors, and passenger genes. Bias in codon  
 12 usage suggests a functional effect of synonymous mutations. Increase in codon usage  
 13 is expected to increase translational efficiency and increase protein abundance.  
 14 Oncogenes are expected to exhibit positive selection for increased codon usage and  
 15 exhibit a non-significant increase as mutational burden declines – consistent with  
 16 positive selection for synonymous mutations within oncogenic drivers that is attenuated  
 17 by Hill-Robertson interference. Similarly, tumor suppressors are expected to exhibit a  
 18 decrease in codon usage at low mutational burdens, which is indeed significant ( $p =$   
 19 0.03) presumably because there are more annotated tumor suppressor genes.

20

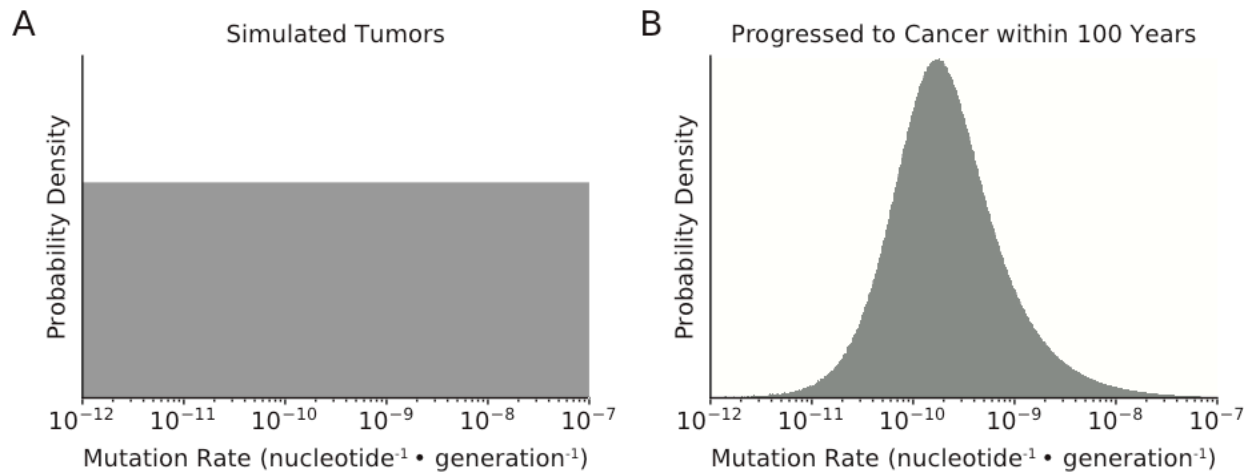

1

2 **Supplementary Figure 20. Distribution of Mutation Rates of simulated tumors. (A)**

3 Mutation rates of all simulated tumors were randomly-sampled from a uniform

4 distribution (in log-space) from  $10^{-12}$  to  $10^{-7}$  nucleotide<sup>-1</sup> • generation<sup>-1</sup>. **(B)** In simulations

5 that best agreed with observed data (MLE of  $s_{\text{drivers}} = 18.8\%$ ,  $s_{\text{passengers}} = 0.96\%$ ), only

6 tumors with intermediate mutation rates progressed to cancer within 100 years. Tumors

7 with lower mutation rates do not progress to cancer within the 100-year time constraint

8 of simulations, while tumors with exceptionally high mutation rates collapse via

9 mutational meltdown.

10

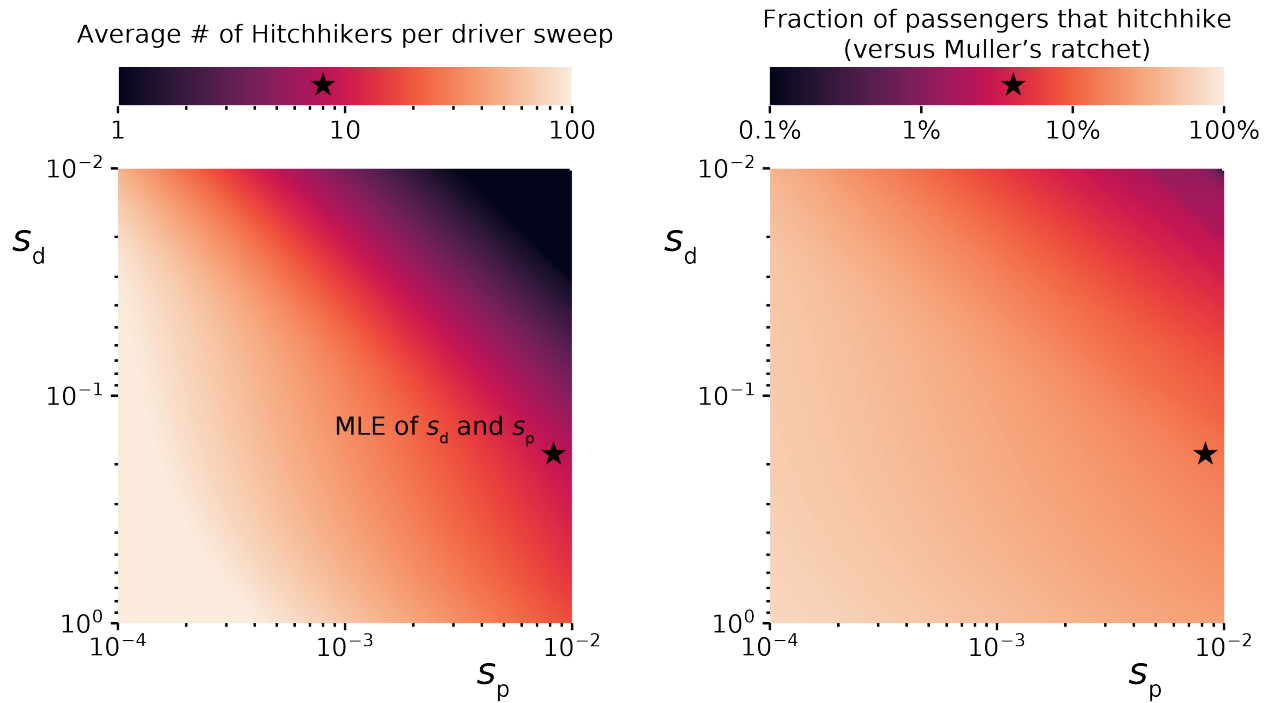

1

2 **Supplemental Figure 21. Relative contribution of Genetic Hitchhiking and Muller's**  
 3 **Ratchet to fix deleterious passengers.** Using analytical theory developed in <sup>7,33,85</sup>, we  
 4 can estimate the relative rates of genetic hitchhiking and Muller's Ratchet in our pan-  
 5 cancer model of tumor evolution. As the relative strength of driver alterations increase  
 6 ( $s_{\text{drivers}}$ ) relative to the selective cost of passengers ( $s_{\text{passengers}}$ ), more passengers  
 7 hitchhike with each driver sweep (left). This increases the relative contribution of  
 8 observed passengers that accumulate via hitchhiking (right). Using the Maximum  
 9 Likelihood Estimates (MLE) of selection for drivers and against passengers, we  
 10 estimate that an average of 8 passengers hitchhike with each driver, which account for  
 11 5.0% of accumulated passengers (the majority, and remainder, accumulate via Muller's  
 12 Ratchet).

13

14



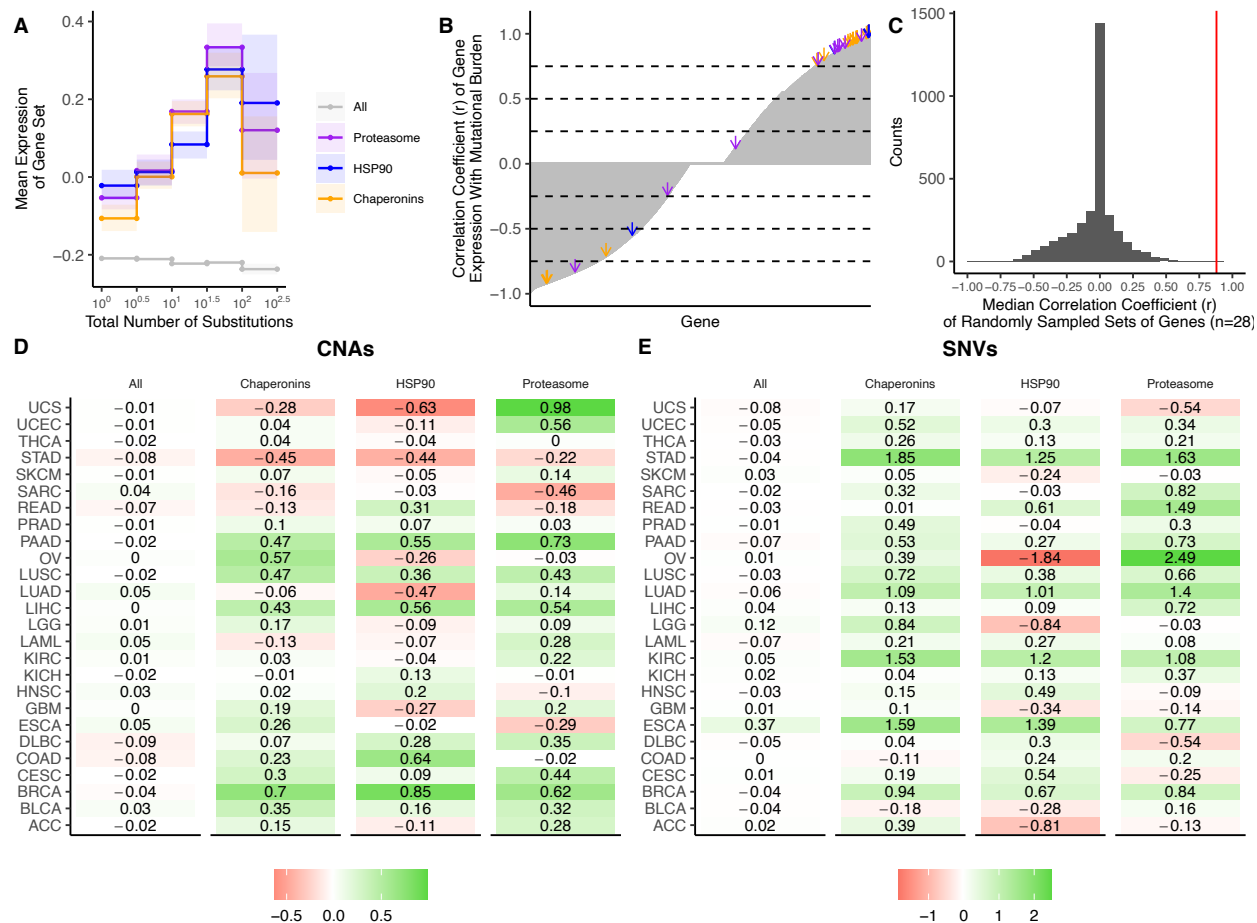

1  
2 **Supplemental Figure 22. Upregulation of heat-shock protein pathways in tumors**  
3 **with elevated mutational burdens. (A)** Z-scores of median gene expression of (i) all  
4 genes, (ii) HSP90, (iii) Chaperonins, and (iv) the Proteasome averaged across tumors  
5 stratified by the total number of CNAs. Expression of HSP90, Chaperonins, and  
6 Proteasome gene sets increases with the mutational burden of tumors (weighted  $R^2$  of  
7 0.78, 0.87 and 0.84, respectively). Error bars are 95% confidence intervals determined  
8 by bootstrap sampling. **(B)** Correlation coefficients ( $r$ ) of the expression of each gene  
9 in the genome (grey) in tumors stratified by the total number of substitutions. Shown in  
10 arrows are the correlation coefficients for HSP90 (blue), Chaperonins (orange), and the  
11 Proteasome (purple). Dashed lines in intervals of 0.25 are for viewing purposes only.  
12 **(C)** Median correlation coefficients of 10 million randomly sampled gene sets of the  
13 same size as HSP90, Chaperonins and the Proteasome ( $n=28$ ) in grey. Red line  
14 denotes the median correlation coefficients of HSP90, Chaperonins, and the  
15 Proteasome (0.88). None of the randomly sampled gene sets have a higher median  
16 correlation coefficient than the observed value (0.88.) **(D-E)** Log-scale heatmap of  
17 changes in the Z-scores of median gene expression values of gene sets in for tumors  
18 stratified by the total number of substitutions **(D)** or CNAs **(E)** for cancer subtypes in  
19 TCGA. Changes in the mean gene expression of all genes, HSP90, Chaperonins, and  
20 Proteasome gene sets in the lowest and highest mutational burden bin for each cancer  
21 subtype are shown. Colors denote whether changes in gene expression from low

1 mutational burden bins to high mutational burden bins are positive (green) or negative  
2 (red). Expression of HSP90, Chaperonins, and Proteasome gene sets increases with  
3 the mutational burden of tumors across cancer types stratified by the number of SNVs  
4 ( $p > 0.05$  ,  $p < 6 \times 10^{-4}$  ,  $p < 3 \times 10^{-3}$  respectively; Wilcoxon signed-rank test) and CNAs (  
5  $p > 0.05$  ,  $p < 2 \times 10^{-2}$  ,  $p < 1.5 \times 10^{-2}$  respectively; Wilcoxon signed-rank test).

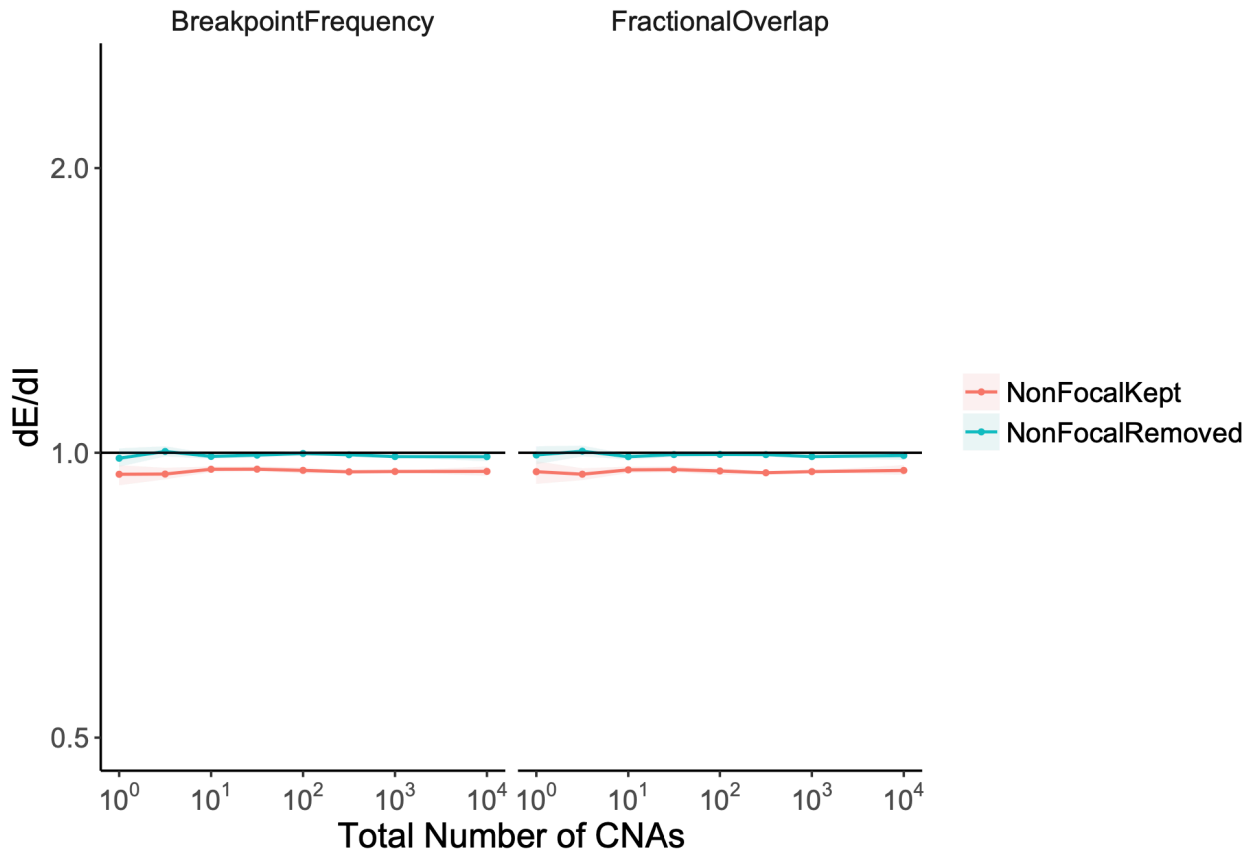

1  
2  
3  
4  
5  
6  
7  
8  
9  
10

**Supplemental Figure 23. Random permutations of the positions of observed CNAs exhibit neutral values of dE/dI.** The stop and start location of each observed CNA was randomly permuted, while preserving its length. dE/dI was calculated for CNAs (with and without non-focal amplifications) using both metrics: breakpoint frequency and fractional overlap. dE/dI values of random permutations are approximately 1, as expected for CNAs not experiencing selection.

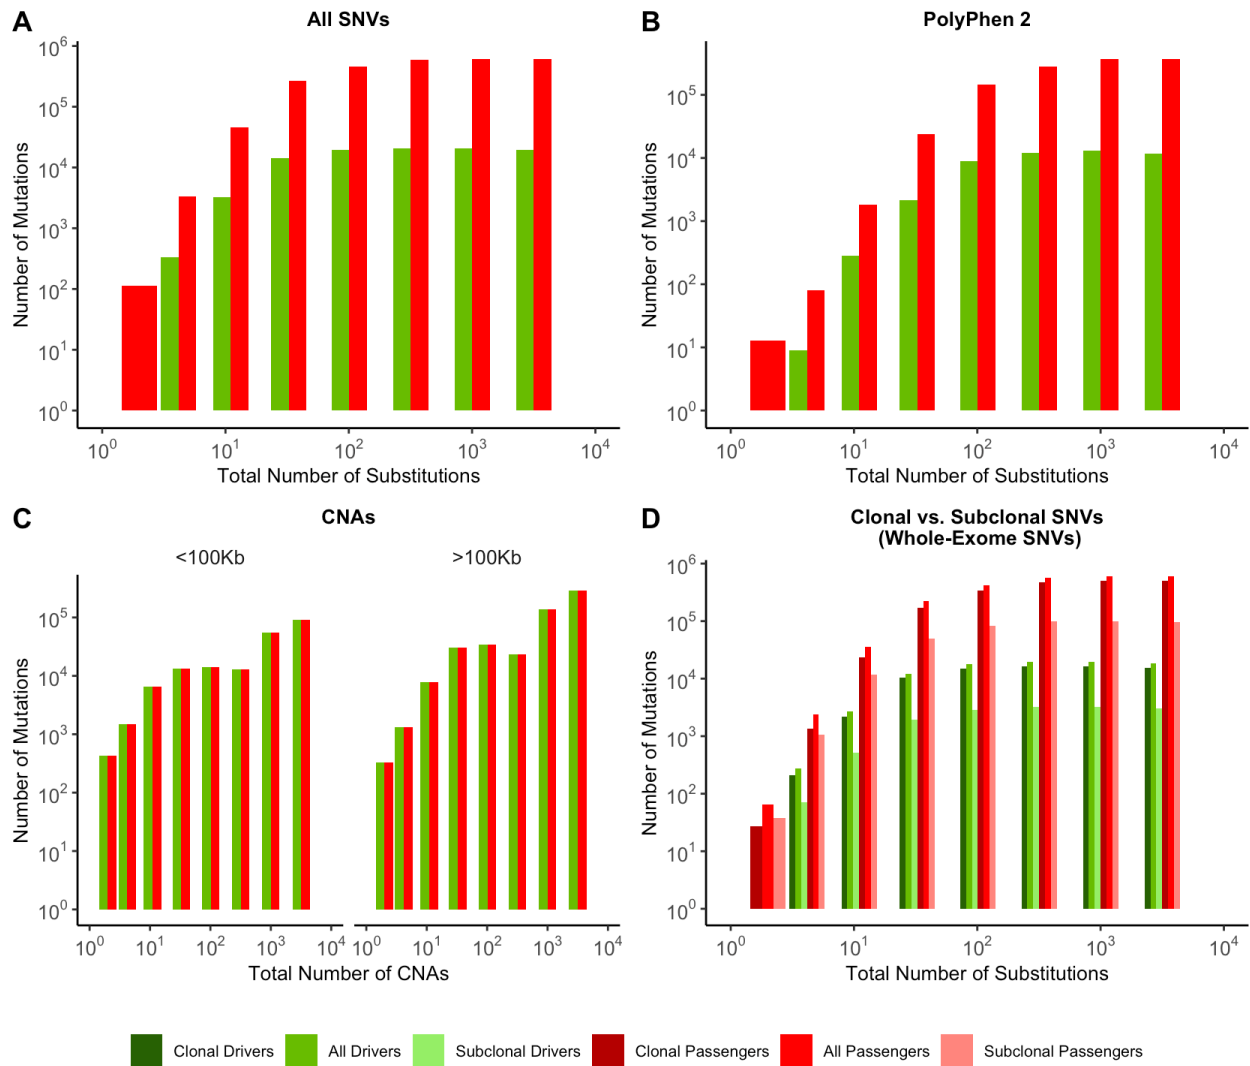

1  
 2 **Supplementary Figure 24. Quantity of mutations within each mutational burden**  
 3 **bin for data depicted in Figure 2. (A-D) all report the total number of samples used in**  
 4 **their respective figure pane within Figure 2. (A) Counts of mutations in passenger (red)**  
 5 **and driver (green) gene sets within tumors stratified by the total number of substitutions**  
 6 **in ICGC and TCGA. (B) Counts of the fraction of pathogenic missense mutations,**  
 7 **annotated by PolyPhen2, in the same driver and passenger gene sets also stratified by**  
 8 **total number of substitutions. (C) Counts of CNAs that reside within putative driver and**  
 9 **passenger gene sets (identified by GISTIC 2.0, Methods) in tumors stratified by the total**  
 10 **number of CNAs and separated by CNA length. (D) Counts of clonal (VAF > 0.2; darker**  
 11 **colors) and subclonal (VAF < 0.2; lighter colors) passenger and driver gene sets in**  
 12 **tumors stratified by the total number of substitutions.**

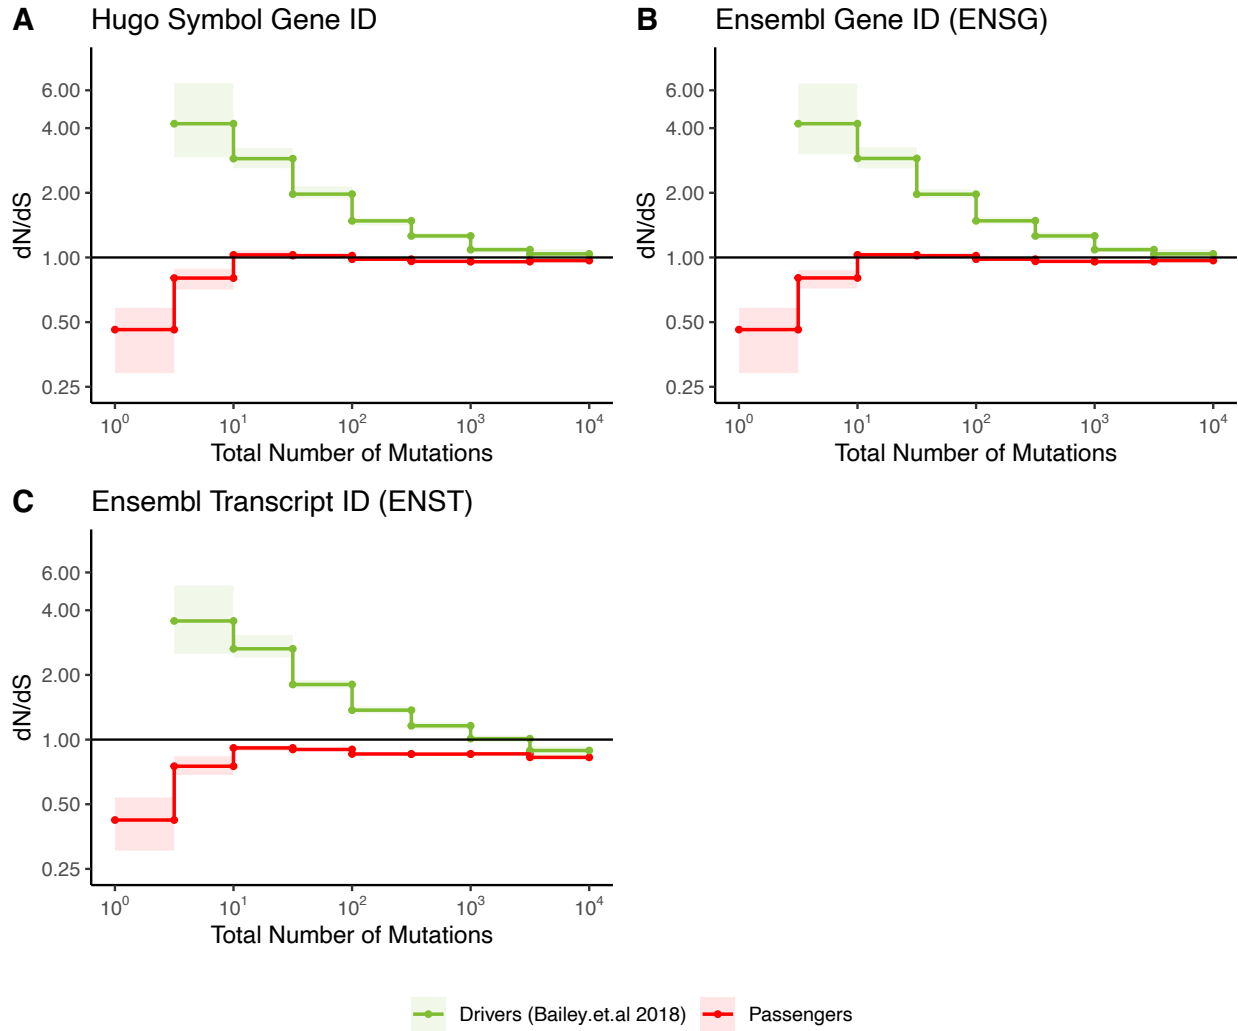

1  
2  
3  
4  
5  
6  
7  
8  
9  
10  
11  
12

**Supplementary Figure 25. Patterns of selection when permuting gene sequences at the transcript or gene level.** All panels show dN/dS of passenger and driver genes in tumors stratified by mutational burden within ICGC and TCGA datasets. **(A-B)** Gene-level sequences, annotated by Hugo symbols or Ensembl gene IDs, are used to permute the tri-nucleotide context of a mutation under the null model of mutagenesis. **(C)** Transcript level gene sequences, annotated by Ensembl, are used to permute the tri-nucleotide context of a mutation under our null model of mutagenesis. The solid line of 1 denotes dN/dS values expected under neutrality. Error bars (shaded area) represent 95% confidence intervals determined by bootstrap sampling.

1 **Supplementary Tables**

2

3 **Table S1. Broad (meta-categories) of cancer subtypes.**

| <b>BROAD CATEGORY (N)</b> | <b>GDC TUMOR SUBTYPES IN GROUP</b>                                           |
|---------------------------|------------------------------------------------------------------------------|
| Circulatory (371)         | LAML, DLBC, CLLE, CMDI, MALY                                                 |
| Endocrine (925)           | ACC, THYM, THCA, PAEN, PCPG                                                  |
| Urinary (1199)            | BLCA, KICH, KIRC, RECA                                                       |
| Nervous (1059)            | LGG, GBM, PBCA                                                               |
| Reproductive (3328)       | BRCA, CESC, EOPC, OV, PRAD, UCEC, TGCT, UCS                                  |
| Respiratory (1557)        | LUSC, LUAD, HNSC                                                             |
| Skeletal (378)            | SARC, BOCA, MESO                                                             |
| Digestive (2181)          | ORCA, LIRI, PAAD, STAD, READ, CHOL, COAD, ESCA, GACA, LINC, ESAD, BTCA, LIHC |
| Skin (614)                | UVM, SKCM, MELA                                                              |

4

1  
2

**Table S2. Assumptions of model of tumor evolution and anticipated effects**

| ASSUMPTION                                       | ANTICIPATED EFFECT ON CONCLUSIONS                                                                       | REFS     |
|--------------------------------------------------|---------------------------------------------------------------------------------------------------------|----------|
| Exponential DFE for drivers & passengers         | ABC estimates effective selection coefficients                                                          | 86       |
| Cells are well-mixed (no spatial structure)      | Reduced Hill-Robertson interference                                                                     | 24,87,88 |
| Gompertzian growth dynamics in-between drivers   | Decreased inferred strength of drivers relative to no growth constraints                                | 33       |
| Only 50% of tumors progress to cancer            | Mutational burdens widen as progression probability declines                                            | 33       |
| No (reciprocal) sign epistasis                   | Stronger fitness benefits of drivers in adaptive contexts                                               | 34,89    |
| Constant mutation rate for each tumor            | Hill-Robertson interference would increase                                                              | 90       |
| Simulated tumor is genotyped at transformation   | Late (subclonal) mutations are ignored; incidence age reduced                                           | 24       |
| Malignancy occurs at 1,000,000 (stem) cells      | Reduced variation in cancer incidence times (as true detection times varies)                            | 33       |
| Subclonal mutations are undetected by genotyping | Lower estimated fitness effects of drivers & passengers (subclonal mutations experience less selection) | 91       |
| No dominance                                     | Nearly-unbiased estimate of heterozygous passenger fitness cost; underestimation of driver benefit      | 92       |

3

## References

1. Martincorena, I. *et al.* Universal Patterns of Selection in Cancer and Somatic Tissues. *Cell* **171**, 1029-1041.e21 (2017).
2. Weghorn, D. & Sunyaev, S. Bayesian inference of negative and positive selection in human cancers. *Nat. Genet.* **49**, 1785–1788 (2017).
3. Hill, W. G. & Robertson, A. The effect of linkage on limits to artificial selection. *Genet. Res.* **8**, 269–94 (1966).
4. Drummond, D. A. & Wilke, C. O. Mistranslation-induced protein misfolding as a dominant constraint on coding-sequence evolution. *Cell* **134**, 341–52 (2008).
5. Lobkovsky, A. E., Wolf, Y. I. & Koonin, E. V. Universal distribution of protein evolution rates as a consequence of protein folding physics. *Proc. Natl. Acad. Sci.* **107**, 2983–2988 (2010).
6. Johnson, T. Beneficial mutations, hitchhiking and the evolution of mutation rates in sexual populations. *Genetics* (1999).
7. Neher, R. a & Shraiman, B. I. Fluctuations of fitness distributions and the rate of Muller’s ratchet. *Genetics* **191**, 1283–1293 (2012).
8. Zapata, L. *et al.* Negative selection in tumor genome evolution acts on essential cellular functions and the immunopeptidome. *Genome Biol.* **19**, 67 (2018).
9. Alexandrov, L. B. & Stratton, M. R. Mutational signatures: the patterns of somatic mutations hidden in cancer genomes. *Curr. Opin. Genet. Dev.* **24**, 52–60 (2014).
10. Haradhvala, N. J. *et al.* Mutational Strand Asymmetries in Cancer Genomes Reveal Mechanisms of DNA Damage and Repair. *Cell* **164**, 538–49 (2016).
11. Ostrow, S. L., Barshir, R., DeGregori, J., Yeger-Lotem, E. & Hershberg, R. Cancer Evolution Is Associated with Pervasive Positive Selection on Globally Expressed Genes. *PLoS Genet.* **10**, 16–20 (2014).
12. Ellrott, K. *et al.* Scalable Open Science Approach for Mutation Calling of Tumor Exomes Using Multiple Genomic Pipelines. *Cell Syst.* **6**, 271-281.e7 (2018).
13. Cancer Genome Atlas Research Network *et al.* The Cancer Genome Atlas Pan-Cancer analysis project. *Nat. Genet.* **45**, 1113–20 (2013).
14. Hudson, T. J. *et al.* International network of cancer genome projects. *Nature* **464**, 993–998 (2010).
15. Forbes, S. a *et al.* The Catalogue of Somatic Mutations in Cancer (COSMIC). *Curr Protoc Hum Genet* **Chapter 10**, Unit 10.11 (2008).
16. Bailey, M. H. *et al.* Comprehensive Characterization of Cancer Driver Genes and Mutations. *Cell* **173**, 371-385.e18 (2018).
17. Gonzalez-Perez, A. *et al.* IntOGen-mutations identifies cancer drivers across tumor types. *Nat. Methods* **10**, 1081–1082 (2013).
18. Adzhubei, I. a *et al.* A method and server for predicting damaging missense mutations. *Nat. Methods* **7**, 248–9 (2010).
19. Korbel, J. O. *et al.* Systematic prediction and validation of breakpoints associated with copy-number variants in the human genome. *Proc. Natl. Acad. Sci.* **104**, 10110–10115 (2007).
20. Zack, T. I. *et al.* Pan-cancer patterns of somatic copy number alteration. *Nat Genet* **45**, 1134–1140 (2013).
21. McGrail, D. J. *et al.* Proteome Instability Is a Therapeutic Vulnerability in Mismatch



- 1 Repair-Deficient Cancer. *Cancer Cell* **37**, 371-386.e12 (2020).
- 2 22. Santagata, S. *et al.* High levels of nuclear heat-shock factor 1 (HSF1) are associated with  
3 poor prognosis in breast cancer. *Proc. Natl. Acad. Sci.* **108**, 18378–18383 (2011).
- 4 23. Messer, P. W. Measuring the Rates of Spontaneous Mutation From Deep and Large-Scale  
5 Polymorphism Data. *Genetics* **182**, 1219–1232 (2009).
- 6 24. Sottoriva, A. *et al.* A Big Bang model of human colorectal tumor growth. *Nat. Genet.* **47**,  
7 209–216 (2015).
- 8 25. López, S. *et al.* Interplay between whole-genome doubling and the accumulation of  
9 deleterious alterations in cancer evolution. *Nat. Genet.* **52**, 283–293 (2020).
- 10 26. Gene Ontology Consortium. The Gene Ontology (GO) database and informatics resource.  
11 *Nucleic Acids Res.* **32**, 258D – 261 (2004).
- 12 27. Grossman, R. L. *et al.* Toward a Shared Vision for Cancer Genomic Data. *N. Engl. J.*  
13 *Med.* **375**, 1109–1112 (2016).
- 14 28. McFarland, C. D., Korolev, K. S., Kryukov, G. V, Sunyaev, S. R. & Mirny, L. a. Impact  
15 of deleterious passenger mutations on cancer progression. *Proc. Natl. Acad. Sci.* **110**,  
16 2910–2915 (2013).
- 17 29. National Cancer Institute, S. S. B. Cancer Incidence – Surveillance, Epidemiology, and  
18 End Results (SEER) Registries Research Data. *Surveillance, Epidemiology, and End*  
19 *Results (SEER) Program (<http://www.seer.cancer.gov>). (2007).*
- 20 30. Frank, S. A. *Dynamics of cancer: Incidence, Inheritance, and Evolution.* (2007).
- 21 31. Supek, F., Miñana, B., Valcárcel, J., Gabaldón, T. & Lehner, B. Synonymous Mutations  
22 Frequently Act as Driver Mutations in Human Cancers. *Cell* **156**, 1324–1335 (2014).
- 23 32. Bozic, I. *et al.* Accumulation of driver and passenger mutations during tumor progression.  
24 *Proc Natl Acad Sci USA* **107**, 18545–18550 (2010).
- 25 33. McFarland, C. D., Mirny, L. a & Korolev, K. S. Tug-of-war between driver and passenger  
26 mutations in cancer and other adaptive processes. *Proc. Natl. Acad. Sci.* **111**, 15138–  
27 15143 (2014).
- 28 34. Rogers, Z. N. *et al.* Mapping the in vivo fitness landscape of lung adenocarcinoma tumor  
29 suppression in mice. *Nat. Genet.* **50**, 483–486 (2018).
- 30 35. Sánchez-Rivera, F. J. *et al.* Rapid modelling of cooperating genetic events in cancer  
31 through somatic genome editing. *Nature* **516**, 428–431 (2014).
- 32 36. Vermeulen, L. *et al.* Defining stem cell dynamics in models of intestinal tumor initiation.  
33 *Science (80-. ).* **342**, 995–998 (2013).
- 34 37. Hanahan, D. & Weinberg, R. A. The Hallmarks of Cancer. *Cell* **100**, 57–70 (2000).
- 35 38. Camps, M., Herman, A., Loh, E. & Loeb, L. a. Genetic constraints on protein evolution.  
36 *Crit Rev Biochem Mol Biol* **42**, 313–326 (2007).
- 37 39. Williams, B. R. *et al.* Aneuploidy Affects Proliferation and Spontaneous Immortalization  
38 in Mammalian Cells. *Science (80-. ).* **322**, 703–709 (2008).
- 39 40. Cassa, C. A. *et al.* Estimating the selective effects of heterozygous protein-truncating  
40 variants from human exome data. *Nat. Genet.* **49**, 806–810 (2017).
- 41 41. Glaire, M. A. & Church, D. N. Hypermutated Colorectal Cancer and Neoantigen Load.  
42 *Immunother. Gastrointest. Cancer* 187–215 (2017).
- 43 42. Gorgoulis, V. G., Pefani, D. E., Pateras, I. S. & Trougakos, I. P. Integrating the DNA  
44 damage and protein stress responses during cancer development and treatment. *J. Pathol.*  
45 **246**, 12–40 (2018).
- 46 43. Dai, C., Whitesell, L., Rogers, A. B. & Lindquist, S. Heat shock factor 1 is a powerful

- 1 multifaceted modifier of carcinogenesis. *Cell* **130**, 1005–1018 (2007).
- 2 44. Zhang, J. *et al.* International Cancer Genome Consortium Data Portal--a one-stop shop for  
3 cancer genomics data. *Database* **2011**, bar026–bar026 (2011).
- 4 45. Carithers, L. J. & Moore, H. M. The Genotype-Tissue Expression (GTEx) Project.  
5 *Biopreserv. Biobank.* **13**, 307–308 (2015).
- 6 46. Faltas, B. M. *et al.* Clonal evolution of chemotherapy-resistant urothelial carcinoma. *Nat.*  
7 *Genet.* **48**, 1490–1499 (2016).
- 8 47. Jiao, Y. *et al.* Exome sequencing identifies frequent inactivating mutations in BAP1,  
9 ARID1A and PBRM1 in intrahepatic cholangiocarcinomas. *Nat. Genet.* **45**, 1470–1473  
10 (2013).
- 11 48. Puente, X. S. *et al.* Non-coding recurrent mutations in chronic lymphocytic leukaemia.  
12 *Nature* **526**, 519–524 (2015).
- 13 49. Chen, K. *et al.* Mutational landscape of gastric adenocarcinoma in Chinese: Implications  
14 for prognosis and therapy. *Proc. Natl. Acad. Sci.* **112**, 1107–1112 (2015).
- 15 50. Tirode, F. *et al.* Genomic Landscape of Ewing Sarcoma Defines an Aggressive Subtype  
16 with Co-Association of STAG2 and TP53 Mutations. *Cancer Discov.* **4**, 1342–1353  
17 (2014).
- 18 51. Li, M. *et al.* Whole-exome and targeted gene sequencing of gallbladder carcinoma  
19 identifies recurrent mutations in the ErbB pathway. *Nat. Genet.* **46**, 872–876 (2014).
- 20 52. Pickering, C. R. *et al.* Integrative genomic characterization of oral squamous cell  
21 carcinoma identifies frequent somatic drivers. *Cancer Discov.* **3**, 770–81 (2013).
- 22 53. Johnson, B. E. *et al.* Mutational Analysis Reveals the Origin and Therapy-Driven  
23 Evolution of Recurrent Glioma. *Science (80-. )*. **343**, 189–193 (2014).
- 24 54. Pilati, C. *et al.* Genomic Profiling of Hepatocellular Adenomas Reveals Recurrent FRK-  
25 Activating Mutations and the Mechanisms of Malignant Transformation. *Cancer Cell* **25**,  
26 428–441 (2014).
- 27 55. Oberg, J. A. *et al.* Implementation of next generation sequencing into pediatric  
28 hematology-oncology practice: moving beyond actionable alterations. *Genome Med.* **8**,  
29 133 (2016).
- 30 56. Chun, H.-J. E. *et al.* Genome-Wide Profiles of Extra-cranial Malignant Rhabdoid Tumors  
31 Reveal Heterogeneity and Dysregulated Developmental Pathways. *Cancer Cell* **29**, 394–  
32 406 (2016).
- 33 57. Guo, G. *et al.* Whole-Exome Sequencing Reveals Frequent Genetic Alterations in BAP1 ,  
34 NF2 , CDKN2A , and CUL1 in Malignant Pleural Mesothelioma. *Cancer Res.* **75**, 264–  
35 269 (2015).
- 36 58. Ren, S. *et al.* Whole-genome and Transcriptome Sequencing of Prostate Cancer Identify  
37 New Genetic Alterations Driving Disease Progression. *Eur. Urol.* **73**, 322–339 (2018).
- 38 59. Armenia, J. *et al.* The long tail of oncogenic drivers in prostate cancer. *Nat. Genet.* **50**,  
39 645–651 (2018).
- 40 60. Shern, J. F. *et al.* Comprehensive Genomic Analysis of Rhabdomyosarcoma Reveals a  
41 Landscape of Alterations Affecting a Common Genetic Axis in Fusion-Positive and  
42 Fusion-Negative Tumors. *Cancer Discov.* **4**, 216–231 (2014).
- 43 61. George, J. *et al.* Comprehensive genomic profiles of small cell lung cancer. *Nature* **524**,  
44 47–53 (2015).
- 45 62. Petrini, I. *et al.* A specific missense mutation in GTF2I occurs at high frequency in thymic  
46 epithelial tumors. *Nat. Genet.* **46**, 844–849 (2014).

- 1 63. Auton, A. *et al.* A global reference for human genetic variation. *Nature* **526**, 68–74  
2 (2015).
- 3 64. Wang, K., Li, M. & Hakonarson, H. ANNOVAR: functional annotation of genetic  
4 variants from high-throughput sequencing data. *Nucleic Acids Res.* **38**, e164–e164 (2010).
- 5 65. Cibulskis, K. *et al.* Sensitive detection of somatic point mutations in impure and  
6 heterogeneous cancer samples. *Nat. Biotechnol.* **31**, 213–219 (2013).
- 7 66. O’Brien, K. P., Remm, M. & Sonnhammer, E. L. L. Inparanoid: a comprehensive  
8 database of eukaryotic orthologs. *Nucleic Acids Res.* **33**, D476–80 (2005).
- 9 67. Campbell, P. & Martincorena, I. dNdScv. *Wellcome Sanger Institute*  
10 <https://www.sanger.ac.uk/science/tools/dndscv> (2017).
- 11 68. Mermel, C. H. *et al.* GISTIC2.0 facilitates sensitive and confident localization of the  
12 targets of focal somatic copy-number alteration in human cancers. *Genome Biol* **12**, R41  
13 (2011).
- 14 69. Carter, S. L. *et al.* Absolute quantification of somatic DNA alterations in human cancer.  
15 *Nat. Biotechnol.* **30**, 413–421 (2012).
- 16 70. Kumar, R. D., Searleman, A. C., Swamidass, S. J., Griffith, O. L. & Bose, R. Statistically  
17 identifying tumor suppressors and oncogenes from pan-cancer genome-sequencing data.  
18 *Bioinformatics* **btv430** (2015) doi:10.1093/bioinformatics/btv430.
- 19 71. Wang, T. *et al.* Identification and characterization of essential genes in the human  
20 genome. *Science (80-. )*. **350**, 1096–1101 (2015).
- 21 72. Eisenberg, E. & Levanon, E. Y. Human housekeeping genes, revisited. *Trends Genet.* **29**,  
22 569–74 (2013).
- 23 73. Calderone, A. & Cesareni, G. mentha: the interactome browser. *EMBnet.journal* **18**, 128  
24 (2012).
- 25 74. Ha, G. *et al.* TITAN: inference of copy number architectures in clonal cell populations  
26 from tumor whole-genome sequence data. *Genome Res.* **24**, 1881–1893 (2014).
- 27 75. Kampinga, H. H. *et al.* Guidelines for the nomenclature of the human heat shock proteins.  
28 *Cell Stress Chaperones* **14**, 105–111 (2009).
- 29 76. Tanaka, K. The proteasome: Overview of structure and functions. *Proc. Japan Acad. Ser.*  
30 *B* **85**, 12–36 (2009).
- 31 77. Arjan G., J. Diminishing Returns from Mutation Supply Rate in Asexual Populations.  
32 *Science (80-. )*. **283**, 404–406 (1999).
- 33 78. Gibson, M. a. & Bruck, J. Efficient Exact Stochastic Simulation of Chemical Systems  
34 with Many Species and Many Channels. *J Phys Chem A* **104**, 1876–1889 (2000).
- 35 79. Turajlic, S. *et al.* Whole genome sequencing of matched primary and metastatic acral  
36 melanomas. *Genome Res.* **22**, 196–207 (2012).
- 37 80. Michor, F., Iwasa, Y., Lengauer, C. & Nowak, M. a. Dynamics of colorectal cancer.  
38 *Semin. Cancer Biol.* **15**, 484–493 (2005).
- 39 81. Howlader, N. *et al.* SEER Cancer Statistics Review 1975–2010. *SEER Cancer Statistics*  
40 *Review, 1975–2010, National Cancer Institute.* (2013).
- 41 82. Csilléry, K., François, O. & Blum, M. G. B. abc: an R package for approximate Bayesian  
42 computation (ABC). *Methods Ecol. Evol.* **3**, 475–479 (2012).
- 43 83. Gelman, A. Parameterization and Bayesian Modeling. *J. Am. Stat. Assoc.* **99**, 537–545  
44 (2004).
- 45 84. Futreal, P. A. *et al.* A census of human cancer genes. *Nat Rev Cancer* **4**, 177–183 (2004).
- 46 85. Bachtrog, D. & Gordo, I. Adaptive evolution of asexual populations under Muller’s

- 1 ratchet. *Evolution (N. Y.)* **58**, 1403–1413 (2004).
- 2 86. Good, B. H., Rouzine, I. M., Balick, D. J., Hallatschek, O. & Desai, M. M. Distribution of  
3 fixed beneficial mutations and the rate of adaptation in asexual populations. *Proc Natl*  
4 *Acad Sci USA* **109**, 4950–4955 (2012).
- 5 87. Korolev, K. S. *et al.* Selective sweeps in growing microbial colonies. *Phys Biol* **9**, 26008  
6 (2012).
- 7 88. Erik A. Martens, Rumen Kostadinov, Carlo C. Maley, and O. H. *et al.* Spatial structure  
8 increases the waiting time for cancer. *New J Phys* **13**, 1–25 (2012).
- 9 89. Krug, J. Adaptation in tunably rugged fitness landscapes: The Rough Mount Fuji Model.  
10 1–33 (2014).
- 11 90. Goyal, S. *et al.* Dynamic mutation-selection balance as an evolutionary attractor. *Genetics*  
12 **191**, 1309–1319 (2012).
- 13 91. McVean, G. A. & Charlesworth, B. The effects of Hill-Robertson interference between  
14 weakly selected mutations on patterns of molecular evolution and variation. *Genetics* **155**,  
15 929–44 (2000).
- 16 92. Whitlock, M. C. Fixation probability and time in subdivided populations. *Genetics* **164**,  
17 767–79 (2003).
- 18
